# Supplementary material
Source: PubMed Central journal article supplement (PMC4183602)
Supplement: ja506889c_si_001.pdf [file ja506889c_si_001.pdf]

# A New Tool to Guide Halofunctionalization Reactions: the Halenium Affinity (*HalA*) Scale

Kumar Dilip Ashtekar,<sup>‡</sup> Nastaran Salehi Marzijarani,<sup>‡</sup> Arvind Jaganathan, Daniel Holmes, James E. Jackson\* and Babak Borhan\*.

Department of Chemistry, Michigan State University, East Lansing, MI 48824

[babak@chemistry.msu.edu](mailto:babak@chemistry.msu.edu), [jackson@chemistry.msu.edu](mailto:jackson@chemistry.msu.edu)

## Table of Contents:

|                                                                                                                          |      |
|--------------------------------------------------------------------------------------------------------------------------|------|
| I. General remarks:.....                                                                                                 | S2   |
| II. Guide to halenium affinity ( <i>HalA</i> ) calculations:.....                                                        | S3   |
| III. Interpreting the halenium affinity table:.....                                                                      | S6   |
| IV. Equilibrium and titration studies on halopyridinium salts:.....                                                      | S12  |
| a. Screening of chlorenium sources for the formation of chloropyridinium complexes of <b>1a</b> :.....                   | S12  |
| b. Titration studies of pyridine derivatives with CDSC: .....                                                            | S15  |
| c. Qualitative analysis of competition experiments between pyridine derivatives:.....                                    | S17  |
| d. <sup>1</sup> H-NMR analysis of chlorination of <b>1c</b> : .....                                                      | S21  |
| e. Formation of halopyridinium salts of <b>1c</b> with different halenium donors: ...                                    | S22  |
| f. Quantitative analysis <i>via</i> competition experiments: .....                                                       | S24  |
| g. Competition study for chlorenium ion transfer from <b>1c</b> -Cl to pyridine derivatives (a quantitative trend):..... | S29  |
| h. Control experiments:.....                                                                                             | S32  |
| V. Synthesis of substrates and intramolecular chlorocyclization of alkenes:....                                          | S36  |
| a. Synthesis of substrates <b>2</b> , <b>4</b> and <b>9</b> :.....                                                       | S36  |
| b. Chlorocyclization of alkenes <b>2</b> , <b>4</b> and <b>9</b> : .....                                                 | S39  |
| VI. Quantum mechanical modeling studies: .....                                                                           | S44  |
| VII. NMR spectra: .....                                                                                                  | S104 |
| VIII. References: .....                                                                                                  | S110 |

## I. General remarks:

All reactions were carried out in flame-dried glassware under an atmosphere of dry nitrogen or argon. Molecular sieves (4Å) were dried at 160 °C under 0.25 mtorr pressure prior to use. Unless otherwise mentioned, solvents were purified as follows. THF was distilled from sodium benzophenone ketyl. NMR spectra were obtained using a 500 MHz Varian NMR spectrometer and referenced using the residual <sup>1</sup>H peak from the deuterated solvent. Infrared spectra were measured on a Nicolet IR/42 spectrometer FT-IR (thin film, NaCl cells). For HRMS (ESI) analysis, a Waters 2795 (Alliance HT) instrument was used and referenced against Polyethylene Glycol (PEG-400-600).

Column chromatography was performed using Silicycle 60Å, 35-75 μm silica gel. Pre-coated 0.25 mm thick silica gel 60 F254 plates were used for analytical TLC and visualized using UV light, iodine, potassium permanganate stain, *p*-anisaldehyde stain or phosphomolybdic acid in EtOH stain.

Halenium sources used in this study: *N*-chlorosuccinimide (NCS), *N*-bromosuccinimide (NBS), *N*-iodosuccinimide (NIS), 1,3-dichloro-5,5-dimethylhydantoin (DCDMH), 1,3-dibromo-5,5-dimethylhydantoin (DBDMH) and *N*-chlorophthalimide (NCP) were re-crystallized prior to use. Chlorodiethylsulfonium hexachloroantimonate (CDSC), bromodiethylsulfonium bromopentachloroantimonate (BDSB), iododiethylsulfonium iodopentachloroantimonate (IDSI) were synthesized as reported previously.<sup>1</sup> Substituted pyridines were distilled and stored over KOH prior to use (except 4-bromopyridine which was distilled immediately after basification of its commercially available HCl salt and used right away). All other commercially available reagents and solvents were used as received unless otherwise mentioned.

## II. Guide to halenium affinity (*HalA*) calculations:

Since we have derived parallels between protonation and halogenation chemistry, the evaluation of gas phase Halenium Affinity (*HalA*) is essentially similar to the reported methods used for derivation of Proton Affinity (*PA*).<sup>2</sup> We define the computationally evaluated *HalA* as the molar enthalpy change for a given Lewis base (:LB) upon its attachment to a halenium ion ( $X^+$ ), as shown below:

$$HalA = -\Delta E(elec) - \Delta ZPE - \Delta E'(vib) + \frac{5}{2}RT ;$$

$$E'_{(vib)}(T) = \sum_{i=1}^{3n-6} \frac{N h \nu_i}{e^{N h \nu_i / RT} - 1}$$

where;  $\Delta E_{(elec)} = E_{(electronic)}(X-LB \text{ adduct}) - [E_{(electronic)}(:LB) + E_{(electronic)}(X^+)]$ ; zero point energy change  $\Delta ZPE = ZPE(X-LB \text{ adduct}) - ZPE(:LB)$ ;  $\Delta E'_{(vib)} = E'_{(vib)}(X-LB \text{ adduct}) - E'_{(vib)}(:LB)$  i.e. difference in temperature dependence of vibrational energy;  $N$  is Avogadro's number,  $h$  is Planck's constant, and  $\nu_i$  is the  $i^{\text{th}}$  vibrational frequency. Finally, the  $5/2 RT$  quantity accounts for translational degrees of freedom and the ideal gas value for the change from two particles to one.

The acceptor fragment (Lewis base) may be neutral or anionic (i.e. the X-LB complex is cationic or neutral), leading to two distinct cases:

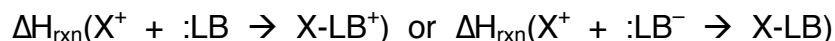

The *HalA* values (gas phase) in kcal/mol are derived at  $T = 298.15$  K (unless noted otherwise) assuming ideal gas behavior.

*Ab initio* assessments may provide accurate *HalA* values, but their computational expense quickly becomes impractical with increasing molecular size. A Density Functional Theory (DFT) approach is affordable and widely available to most organic chemists who wish to evaluate *HalA* values and apply them in the planning of halofunctionalization reactions. Our combined theoretical-experimental optimizations for the best compromise between computational expense and reliability of *HalA* values, have led us to the application of the following basis sets based on the halenium ion under consideration: a.) for fluorenium, chlorenium and bromenium ions - B3LYP/6-31G\*. b.) for iodanium ion – B3LYP/6-31G\*/LANL2DZ. To calculate *HalA* values from theory for gas phase reactions (appropriate solvent models can be applied if necessary) the following steps were followed:

1. An appropriate basis set must be chosen based on the halenium ion under consideration.
2. The Lewis base is initially subjected to a conformational search at the level of theory decided from step 1. To confirm that each structure was a true minimum, vibrational analyses were performed. If necessary, the lowest energy conformer can be re-subjected to a full geometry optimization to verify convergence.
3. The halenium ion (in its triplet state) is also subjected to the same level of theory for a geometry optimization.



4. The Lewis base-halogenium ion adduct is then subjected to step 2 as described above. If there are multiple nucleophilic sites within the same molecule (Lewis base), then separate calculations must be initiated with appropriate attachment of the halogenium ion to each nucleophilic site.

5. The following three values are extracted from each of the output files for geometry minimized Lewis base (lowest energy conformer) and the Lewis base-halogenium ion adduct/complex: a.) electronic energy (E), b.) zero point energy (ZPE) and, c.) temperature dependence of vibrational energy  $E'_{(vib)}$ .

The electronic energy of the halogenium ion is also obtained from its corresponding output file.

6.) Finally, these values (converted to kcal/mol) are then substituted in the following equation to obtain the  $HalA$  (X) for the Lewis base.

$$HalA = -\Delta E(elec) - \Delta ZPE - \Delta E'(vib) + \frac{5}{2}RT ;$$

Alternatively, the excel file template provided as a separate section of supporting information can be used to obtain the  $HalA$  value by simply entering the six values obtained from the output files for geometry minimized Lewis base (lowest energy conformer) and the Lewis base-halogenium ion adduct/complex.

### III. Interpreting the halenium affinity table:

The Halenium affinity table (attached as a separate section of supporting information) provides over 500 *HalA* (Cl) values for various halenium acceptors that are categorized based on functional groups. Each category includes an organized trend of *HalA* values for acceptors based on their ring size, substitution pattern, nucleophilicity etc. For searching a category of acceptors or even a particular acceptor, the table also provides labels and molecular formulas. The labels are based on the functionalities and/or the acceptor atom. For instance, the *HalA* (Cl) of morpholine can be found by searching the document for molecular formula-  $C_4H_9NO$ . Since, morpholine incorporates nitrogen and oxygen atoms serving as halenium ion acceptors, searching the document under the label '**NO**' will lead to a quick recognition of compounds incorporating **N**itrogen and **O**xygen atoms that have been evaluated for halenium affinity (e.g. N-methyl morpholine, 4-hydroxypyridine, methoxypyridines, amides etc.). Apart from simply being a listing of *HalA* (Cl) values, the table also provides the reader with useful and handy trends that can be interpreted based on their ring size, steric strain etc. The following four examples illustrate a few of several trends.

## Example 1

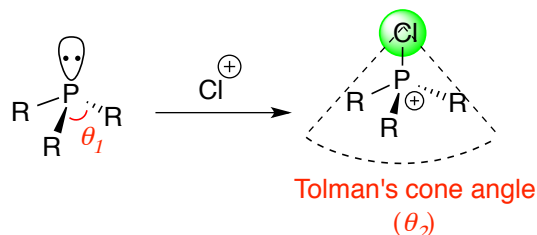

|                  |                                                 |   |                                                  |   |                                                    |   |                                                                |   |                                                          |
|------------------|-------------------------------------------------|---|--------------------------------------------------|---|----------------------------------------------------|---|----------------------------------------------------------------|---|----------------------------------------------------------|
|                  | $\text{H}-\text{P}-\text{H}$<br> <br>$\text{H}$ | < | $\text{H}-\text{P}-\text{H}$<br> <br>$\text{Ph}$ | < | $\text{Ph}-\text{P}-\text{Ph}$<br> <br>$\text{Ph}$ | < | $1\text{-naph}-\text{P}-1\text{-naph}$<br> <br>$1\text{-naph}$ | < | $i\text{-Pr}-\text{P}-t\text{-Bu}$<br> <br>$i\text{-Pr}$ |
| Label            | <b>P1</b>                                       |   | <b>P2</b>                                        |   | <b>P6</b>                                          |   | <b>P8</b>                                                      |   | <b>P5</b>                                                |
| $\theta_1$       | 93.4°                                           |   | 93.0°                                            |   | 102.6°                                             |   | 103.0°                                                         |   | 107.4°                                                   |
| $\theta_2$       | 48.0°                                           |   | 51.0°                                            |   | 106.1°                                             |   | 123.5°                                                         |   | 146.1°                                                   |
| <i>HalA</i> (Cl) | 156.0                                           |   | 184.6                                            |   | 215.0                                              |   | 221.3                                                          |   | 220.5                                                    |

The relationship of sterics incorporated in substituted phosphines to their electron donating ability can be best described by the Tolman's concept of cone angles.<sup>3</sup> To represent the trend of halonium affinity in phosphines, we have employed the cone angle where the metal center is replaced by a chlorine atom. As shown above, the increasing steric demand of the substituents on phosphine leads to an increased internal angle ( $\theta_1$ ) for R-P-R (**P1**-93.4° < **P2**-93.0° < **P6**-102.6° < **P8**-103.0° < **P5**-107.4°) eventually shifting the trigonal pyramidal geometry of the phosphine towards trigonal planar. Thus in sterically bulky phosphines, the R-P bond gains more 's' character leading to higher 'p' character in the lone pair. A lone pair with more 'p' character is less bound to the nucleus and displays enhanced nucleophilicity for the free phosphine. Meanwhile, as substituent bulk increases, the strain in the larger cone angle ( $\theta_2$ ) cases of the halo-phosphonium ion opposes this effect, leading to a leveling off of the rate of increase in the *HalA* (Cl) values.

## Example 2

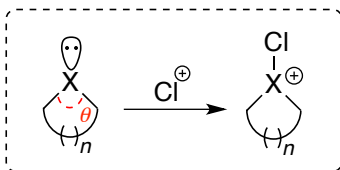

|                                |            |   |            |   |            |   |            |
|--------------------------------|------------|---|------------|---|------------|---|------------|
|                                |            | < |            | < |            | < |            |
| Label                          | <b>S13</b> |   | <b>S14</b> |   | <b>S15</b> |   | <b>S16</b> |
| $\angle\text{C-S-C } (\theta)$ | 47.5°      |   | 76.6°      |   | 93.7°      |   | 97.8°      |
| <i>HalA</i> (Cl)<br>(Kcal/mol) | 147.3      |   | 155.2      |   | 159.1      |   | 161.5      |
|                                |            |   |            |   |            |   |            |
|                                |            | < |            | < |            | < |            |
| Label                          | <b>N58</b> |   | <b>N59</b> |   | <b>N60</b> |   | <b>N61</b> |
| $\angle\text{C-N-C } (\theta)$ | 61.4°      |   | 90.5°      |   | 104.6°     |   | 111.7°     |
| N-Cl (Å)                       | 1.76       |   | 1.79       |   | 1.80       |   | 1.80       |
| <i>HalA</i> (Cl)<br>(Kcal/mol) | 157.4      |   | 164.3      |   | 165.4      |   | 165.9      |

As described for example 1 above, a similar trend of *HalA* (Cl) is observed for compounds **S13** to **S16** and **N58** to **N61**. With increasing ring size, the angle strain for C-N-C or C-S-C ( $\theta$ ) is relieved. The increase in 'p' character of the lone pair with increasing ring size enhances the nucleophilicity of the heteroatoms and hence their halonium affinity. In contrast, as we go from left to right the increasing 'p' character of the lone pair results in a longer bond to the chlorine atom (intrinsic effect due to the geometry). This can be seen from increasing N-Cl distance in the chlorinated analogs. Among the compounds shown above, the lone pair electrons in **S13** and **N58** are tightly

bound to the nucleus as they have the highest 's' character and hence the resulting S-Cl or N-Cl bond is the strongest.

### Example 3

|                                |               |   |               |   |               |   |                   |   |               |   |               |
|--------------------------------|---------------|---|---------------|---|---------------|---|-------------------|---|---------------|---|---------------|
|                                | =             | < | Me            | < | Et            | < | i-Pr              | < | t-Bu          | < | Ph            |
|                                | <b>A44</b>    |   | <b>A45</b>    |   | <b>A46</b>    |   | <b>A47</b>        |   | <b>A48</b>    |   | <b>A49</b>    |
| <i>HalA</i> (Cl)<br>(Kcal/mol) | 136.2         |   | 146.0         |   | 148.4         |   | 150.9             |   | 153.6         |   | 167.4         |
|                                |               |   |               |   |               |   | ↓ Cl <sup>⊖</sup> |   |               |   |               |
|                                |               |   |               |   |               |   |                   |   |               |   |               |
| Label                          | <b>A44-Cl</b> |   | <b>A45-Cl</b> |   | <b>A46-Cl</b> |   | <b>A47-Cl</b>     |   | <b>A48-Cl</b> |   | <b>A49-Cl</b> |
| $\theta_1$                     | 67.3°         |   | 61.8°         |   | 60.5°         |   | 58.7°             |   | 54.9°         |   | 43.6°         |
| $\theta_2$                     | 67.3°         |   | 74.4°         |   | 76.1°         |   | 78.7°             |   | 84.2°         |   | 102.2°        |

The ascending trend of *HalA* (Cl) values in this example (as anticipated) displays the increasing reluctance of chloronium ion to form a three membered cyclic intermediate (chloriranium ion) with the increasing inductive and hyperconjugative donating effects of the substituent on the terminal olefin. Ethylene (**A44**) by itself forms a symmetrically bridged chloriranium ion **A44-Cl**. The increasing donating effect of the substituents (**A45-A48**) distorts this symmetry as indicated by the C-Cl distances and the bond angles  $\theta_1$  and  $\theta_2$ . The phenyl ring in styrene (**A49**) stabilizes the chloronium ion via resonance electron donation. The delocalization of this positive charge results in the corresponding chloromethyl carbenium ion **A49-Cl**.<sup>4</sup>



approaches the natural bond angle in cyclopropane ( $\theta = 60.0^\circ$ ) via partial hybridization of the  $sp^2$  carbons. Though cyclobutene undergoes similar changes in its bond angles upon formation of **A87-Cl**, it has a relatively higher *HalA* (Cl). A switch in the trend of *HalA* (Cl) values is observed for cyclopentene (**A88**) and cyclohexene (**A89**). Their orbital energies being similar, the only difference arises due to the change in angle strain upon formation of **A88-Cl** and **A89-Cl**. The resulting hybridization in **A88-Cl** brings  $\theta_2$  ( $109.2^\circ$ ) closer to the bond angle in the parent cyclopentane ( $\theta = 103.3^\circ$ ,  $\theta_2 - \theta = 5.9^\circ$ ) in comparison to formation of **A89-Cl**, which results in elevated angle strain as  $\theta_2$  ( $120.8^\circ$ ) deviates further from cyclohexane ( $\theta = 111.5^\circ$ ,  $\theta_2 - \theta = 9.3^\circ$ ). Finally, as  $\theta_1$  increases with increasing ring size ( $\theta_1$ -**A91**), the corresponding change in the geometry of the olefin escalates its nucleophilicity.

#### IV. Equilibrium and titration studies on halopyridinium salts:

##### a. Screening of chlorenium sources for the formation of chloropyridinium complexes of **1a**:

To test the validity of theoretically evaluated halonium affinity values, we studied the possibility for the formation of chloropyridinium complexes *via*  $^1\text{H}$  NMR. In this respect, 2,4,6-trimethylpyridine **1a** was initially chosen as a model substrate and acetone- $d_6$  was identified as the optimum solvent of choice. The corresponding halopyridinium salts of **1a** displayed low solubility in other commercially available deuterated solvents. Halo-pyridinium salts of **1a** were found to be soluble in tetrahydrofuran- $d_8$  (THF), but this solvent was prohibitively expensive for the large number of planned experiments. Furthermore, the possibility of chlorination of acetone under reaction conditions was ruled out based on three control experiments (see section III-h for further discussion), thus assuring that acetone is not a reactive solvent.

The formation of halo-pyridinium complex (**1a-X**) was monitored by observing the

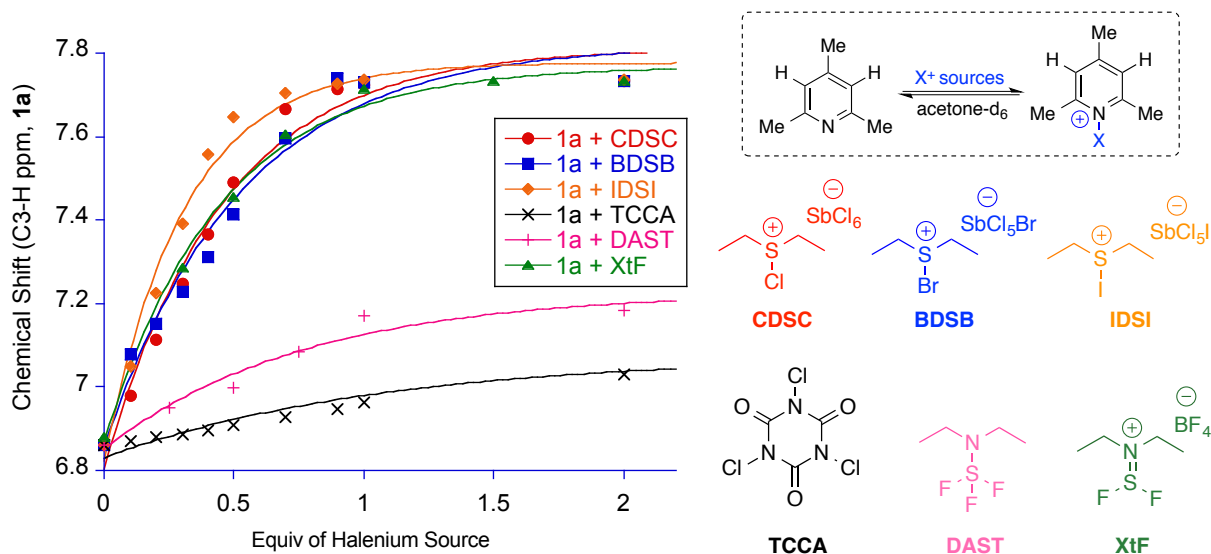

**Figure S1.** Plot for titration of **1a** with various halonium ion sources representing the chemical shift change of C3-H (ppm, **1a**) as a function of added halonium ion source.



chemical shift (ppm) change of the C3-H aromatic hydrogens of **1a** upon treatment with various amounts of halenium sources ( $X^+$ ). As seen in Figure S1, halenium ion sources such as NCS, NCP, dichloramine-T and TCCA with *HalA* values lower than **1a** did not fully transfer halenium ion to **1a**, whereas XtalFluor-E<sup>®</sup>, CDSC, BDSB, and IDSI did form the halo-pyridinium salts. A significant downfield shift of C3-H (approximately 0.9 ppm) is evident when 1.0 equivalent of the latter halenium sources are added to **1a** (since the extent of positive charge localized on the pyridine nucleus is the same in the halo-pyridinium salts **1a-F**, **1a-Cl**, **1a-Br** and **1a-I**, the extent of downfield chemical shift observed for C3-H was also the same upon addition of 1.0 equiv of halenium sources). After addition of 1.0 equivalent of halenium ion source to **1a**, there no further observable change in the chemical shift of C3-H (of **1a-Cl**) as the titration is extended beyond 1.0 equiv of the halenium source (indication for the formation of 1:1 complex). Based on the *HalA* values, TCCA and DAST do not have the ability to completely transfer  $X^+$  ion, resulting only in stronger halogen bonding that leads to a 0.16 and 0.34 ppm downfield shift of C3-H, respectively. No chemical shift changes were observed when NCS, DCDMH, dichloramine-T, and N-chlorophthalimide sources were used. Addition of up to 5.0 equiv of TCCA (i.e. 15.0 equiv of active chlorenium ion) did not shift C3-H further downfield. However, with this excess of halogenating reagent, new peaks appeared in the aromatic region of the <sup>1</sup>H-NMR spectrum, suggesting side reactions such as benzylic chlorination. EI-MS studies on the crude mixture displayed masses for mono, di- and tri-chlorinated **1a**). Radical chlorination of the aromatic ring can be ruled out since the same product was obtained when the experiment was repeated in the dark.

**Table S1.** Absolute and relative *HalA* values (gas phase) of **1a** in comparison to different halonium sources. Since SM8 is not compatible for elements >Kr, the gas phase *HalA* values are depicted for comparison of the halonium (F, Cl, Br and I) sources.

| Entry | Halonium source | Halonium ion (X) | <i>HalA</i> (X) of <b>1a</b> (kcal/mol) | <i>HalA</i> (X) of halonium ion source (kcal/mol) | $\Delta HalA$ (kcal/mol) |
|-------|-----------------|------------------|-----------------------------------------|---------------------------------------------------|--------------------------|
| 1     | DAST            | F <sup>+</sup>   | 288.8                                   | 432.2                                             | 143.4                    |
| 2     | XtF             | F <sup>+</sup>   | 288.8                                   | 294.7                                             | 5.9                      |
| 3     | NCS             | Cl <sup>+</sup>  | 168.2                                   | 290.1                                             | 121.9                    |
| 4     | DCDMH           | Cl <sup>+</sup>  | 168.2                                   | 275.7                                             | 107.5                    |
| 5     | NCP             | Cl <sup>+</sup>  | 168.2                                   | 286.7                                             | 118.5                    |
| 6     | Dichloramine-T  | Cl <sup>+</sup>  | 168.2                                   | 273.3                                             | 105.1                    |
| 7     | TCCA            | Cl <sup>+</sup>  | 168.2                                   | 253.0                                             | 84.8                     |
| 8     | CDSC            | Cl <sup>+</sup>  | 168.2                                   | 161.3                                             | -6.9                     |
| 9     | BDSB            | Br <sup>+</sup>  | 179.4                                   | 133.2                                             | -46.2                    |
| 10    | IDSI            | I <sup>+</sup>   | 141.1                                   | 96.7                                              | -44.4                    |

NCS, DCDMH, NCP and Dichloramine-T, and have 121.9, 107.5, 118.5, and 105.1 (kcal/mol) higher gas phase chloronium affinities than trimethyl pyridine, respectively (Table S1, entries 3-6). These large differences are corroborated by the experimental data and explain why the corresponding halo-pyridinium complexes are not formed. In organic solvents, conversion of neutral species into charged products is typically uphill in energy, so the conjugate anion of the halonium ion donor will always be more potent acceptor than **1a**. Thus, it is no surprise that chloronium ion transfer from neutral donors to substituted pyridines to yield halo-pyridiniums is unlikely. Therefore, for all subsequent experiments, CDSC was employed as the chloronium donor, BDSB as the Br<sup>+</sup> donor and IDSI as the I<sup>+</sup> donor; the corresponding gas phase *HalA* values (gas phase) are 161.3, 133.2, and 96.7 kcal/mol, respectively (Table S1, entries 8-10).

## b. Titration studies of pyridine derivatives with CDSC:

Substituted pyridines 4-phenylpyridine (**1h**), 4-cyanopyridine (**1f**), pyridine 4-carbaldehyde (**1i**), 4-trifluoromethylpyridine (**1e**), and 4-dimethylaminopyridine (**1j**) were titrated with CDSC (0.0-2.0 equiv) in acetone- $d_6$  at room temperature (Figure S2). The range of  $HaIA$  (Cl) values (gas phase) for these pyridines spans from 145.2 to 176.0 kcal/mol. B3LYP/6-31G\*/SM8 is not compatible for the antimony (VI) chloride counterion associated with CDSC, hence we resorted comparing gas phase  $HaIA$  (Cl) values of

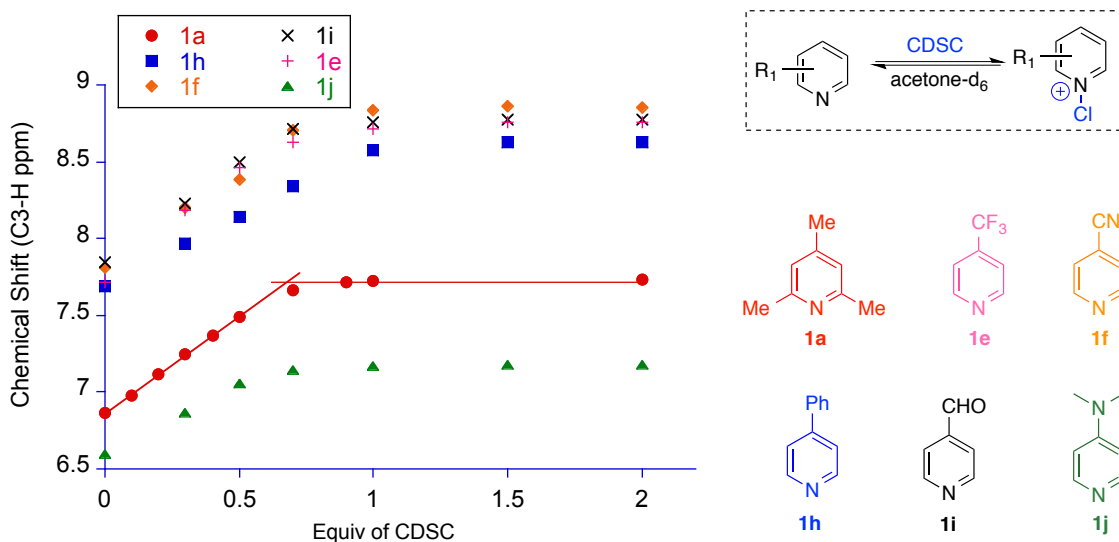

**Figure S2.** Plot for titration of pyridines **1a-i** with various CDSC representing the chemical shift change of C3-H (ppm) as a function of added CDSC. The biphasic nature of the data for the titration of **1a** is illustrated by two straight lines.

diethyl sulfide and substituted pyridines. The gas phase  $HaIA$  (Cl) values are 161.3 for diethyl sulfide and 168.2 for **1a**. Figure S2 depicts the downfield shifts of the pyridines' C3-H resonances as they are titrated with CDSC (0.0-2.0 equiv), forming chloropyridinium complexes. In all cases the formation of a 1:1 complex of Lewis base:halonium ion was confirmed on the basis of the unchanged chemical shifts of C3-H beyond addition of a stoichiometric equivalent of CDSC.

As Table S2 shows, halonium ion transfer to substituted pyridines can be easily monitored from the downfield chemical shift change of the aromatic proton (*meta* proton, C3-H). The most electron rich pyridine **1j** (DMAP) shows an attenuated shift as a result of the electron donating C<sub>4</sub>-*N,N*-dimethylamine, which prior to chloronium transfer alters the chemical shift of the C3-H significantly in comparison to other substituted pyridines. The observed chemical shift change between the free pyridine derivatives and their protonated analogs (~1 ppm downfield), closely matches those observed upon treatment of pyridine derivatives **1a-j** with 1.0 equiv of CDSC. This clearly suggests complete chloronium atom transfer to the nitrogen in all these pyridines to form the corresponding chloropyridinium salts. However, the exact chemistry of Cl<sup>+</sup> delivery by CDSC is not completely understood. The range of *HalA* (Cl) values (SM8-acetone) for the pyridines in Table S2 spans from 137.2 to 154.3 kcal/mol, while that simply calculated for diethyl sulfide is 151.6, yet as noted above, complete chloronium transfer is clearly indicated by the NMR results. Exploratory studies of possible explanations

**Table S2.** Absolute and relative *HalA* values in kcal/mol obtained from gas phase and (SM8-acetone) calculation of pyridine derivatives **1a-j** in comparison to diethyl sulfide–mimicking CDSC. <sup>a</sup>The  $\Delta HalA$  values displayed below represent the difference in *HalA* (Cl) values between the pyridine derivatives and diethyl sulfide. The *HalA* value of diethyl sulfide is 161.3 kcal/mol (gas phase) and 151.6 kcal/mol (SM8-acetone).

| Entry | Pyridine derivatives            | <i>HalA</i> gas phase | <i>HalA</i> | $\Delta HalA$ gas phase | $\Delta HalA$ SM8-acetone <sup>a</sup> | $\Delta$ ppm (C3-H) |
|-------|---------------------------------|-----------------------|-------------|-------------------------|----------------------------------------|---------------------|
| 1     | <b>1j</b> (4-NMe <sub>2</sub> ) | 176.0                 | 154.3       | 14.7                    | 2.7                                    | 0.576               |
| 2     | <b>1a</b> (2,4,6-trimethyl)     | 168.2                 | 148.2       | 6.9                     | -3.4                                   | 0.868               |
| 3     | <b>1h</b> (4-Ph)                | 165.7                 | 145.7       | 4.4                     | -5.9                                   | 0.936               |
| 4     | <b>1i</b> (4-CHO)               | 150.8                 | 140.8       | -10.5                   | -10.8                                  | 0.921               |
| 5     | <b>1f</b> (4-CN)                | 145.2                 | 138.0       | -16.1                   | -13.6                                  | 1.048               |
| 6     | <b>1e</b> (4-CF <sub>3</sub> )  | 149.3                 | 137.2       | -12.0                   | -14.4                                  | 1.050               |

involving differential ion pairing of the  $\text{SbCl}_6^-$  counterion with  $\text{Et}_2\text{SCI}^+$  vs the chloropyridinium cations are not accessible to the present method as the SM8 solvent model included in the Spartan code does not extend to antimony. Hence, we focus our analysis on comparisons of the *HalA* values within the same class (i.e. the pyridine derivatives in this case) of Lewis bases.

### c. Qualitative analysis of competition experiments between pyridine derivatives:

To validate the *HalA* scale on a more conclusive manner, the equilibrium of various substituted chloropyridiniums were investigated. In a typical experiment, a stock solution of CDSC (1.0 equiv) was added at room temperature to an acetone- $d_6$  solution of pyridine **A** (1.0 equiv), which has a lower calculated *HalA* than diethyl sulfide. Complete formation of the chloro-pyridinium complex (**A-Cl**) was then confirmed by  $^1\text{H}$  NMR analysis. To this complex (**A-Cl**), pyridine **B** (1.0 equiv), chose to have a higher calculated *HalA* value than **A** was added to generate **B-Cl** *via* abstraction of chloronium

**Table S3.** Absolute and relative *HalA* values in kcal/mol (SM8-acetone) of pyridine derivatives **1a-j**.

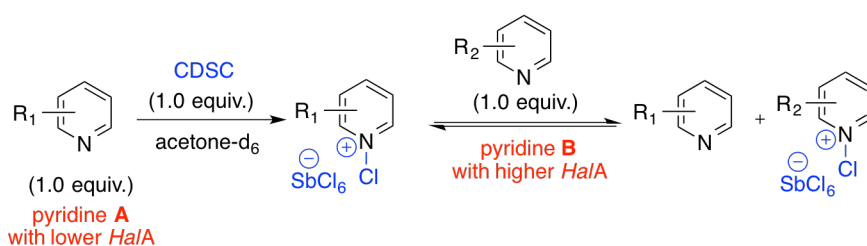

| Entry | Pyridine derivatives (A)       | <i>HalA</i> (kcal/mol) of pyridines (A) | ( $A_{Cl}/A$ ) | Pyridine derivatives (B)        | <i>HalA</i> (kcal/mol) | ( $B_{Cl}/B$ ) |
|-------|--------------------------------|-----------------------------------------|----------------|---------------------------------|------------------------|----------------|
| 1     | <b>1e</b> (4-CF <sub>3</sub> ) | 137.2                                   | 0.35           | <b>1a</b> (2,4,6-trimethyl)     | 148.2                  | 0.80           |
| 2     | <b>1f</b> (4-CN)               | 138.0                                   | 0.37           | <b>1a</b> (2,4,6-trimethyl)     | 148.2                  | 0.80           |
| 3     | <b>1f</b> (4-CN)               | 138.0                                   | 0.52           | <b>1e</b> (4-CF <sub>3</sub> )  | 137.2                  | 0.56           |
| 4     | <b>1e</b> (4-CF <sub>3</sub> ) | 137.2                                   | 0.04           | <b>1j</b> (4-NMe <sub>2</sub> ) | 154.3                  | 0.75           |
| 5     | <b>1a</b> (2,4,6-trimethyl)    | 148.2                                   | 0.29           | <b>1j</b> (4-NMe <sub>2</sub> ) | 154.3                  | 0.79           |
| 6     | <b>1i</b> (4-CHO)              | 150.8                                   | 0.29           | <b>1h</b> (4-Ph)                | 165.7                  | 1.0            |
| 7     | <b>1h</b>                      | 165.7                                   | 0.28           | <b>1a</b>                       | 168.2                  | 0.70           |

ion from **A**-Cl. The established equilibrium was then analyzed *via*  $^1\text{H-NMR}$  analysis. The amount of each chlorinated pyridine derivative was determined by examining the chemical shift change of C3-H and correlating it with the titration data of each substituted pyridine with CDSC (Figure S2). For example, in the competition between **1e** and **1a**, C3-H for **1e**-Cl under the equilibrium mixture resonates at 8.27 ppm. Using linear interpolation based on the biphasic behavior seen between the limiting shifts observed for unchlorinated and chlorinated pyridines in titrations with CDSC, this shift indicates that 0.35 mol fraction of **1e** is chlorinated. Similarly, C3-H of **1a**, resonating at 7.67 ppm correlates to a 0.80 mol fraction of **1a**. (Note: the sum of the individual mole fractions is over 100% ( $0.35 + 0.80 = 1.15$ ) and this can be attributed to the fact that the actual chemical shift observed for C3-H under sub-stoichiometric amounts of halonium source is influenced by dimerization). Table S3 shows the fraction of chlorinated pyridine **A** and **B**, extracted from the titration curves in Figure S2 based on the changes in the chemical shifts of C3-H aromatic proton of the substituted pyridines. This shows a correlation between the calculated chlorenium affinities and experimental results. As anticipated, pyridine **B** with higher *HalA* value yields a greater ratio of **B**<sub>Cl</sub>:**B**. This is a fair *qualitative* comparison to display the transfer of chlorenium ion from pyridine **A** (with a relatively lower *HalA*) to pyridine **B** exhibiting a relatively higher *HalA* value. Pyridine derivative **1a** has 18.9 and 23.0 kcal/mol higher *HalA* than **1e** and **1f**, respectively, and thus the chlorenium ion is mostly transferred to **1a** (with 0.80 equivalents chlorinated, Table S3, entry 1 and 2). The smallest difference in the fraction of chlorinated complex is observed between **1f** and **1e** (0.56 versus 0.52, Table S3, entry 3). This is in

complete agreement with the *HalA* values of the two pyridines. *HalA* (Cl) of **1f** is 138.0 kcal/mol and *HalA* (Cl) of **1e** is 137.2 kcal/mol.

These experiments qualitatively display the correlation between theoretically calculated *HalA* values and the fraction of chlorinated pyridine observed by <sup>1</sup>H NMR. However, these experimental results cannot be used for quantitative analysis. As shown in Figures S1 and S2, the titration curves are nonlinear prior to addition of full stoichiometric equivalent amounts of halonium ion sources (CDSC, BDSB and IDSI), clearly suggesting the possibility of dimerization. This dimerization was confirmed when treatment of **1a** with 0.5 equivalents of BDSB (or IDSI) in CDCl<sub>3</sub> displayed a downfield shift of the C3-H to 7.2 ppm. The extent of this shift is in accordance to the reported halogenated dimers of **1a**.<sup>5</sup> The tendency of halo-pyridinium to undergo dimerization with the free base when subjected to sub-stoichiometric amounts of halonium source limits the quantitative analysis.<sup>6</sup> Moreover, the rapid exchange of chlorenium ion between the chlorinated and non-chlorinated acceptors leads to an averaged NMR signal, which does not allow for a direct measure of each species *via* integration.

Seeking reliable means for qualitative and quantitative analysis, we attempted to block pyridine-halogen-pyridine dimerization and the fast exchange of halonium ion in order to observe the chlorinated and non-chlorinated species under NMR timescale. Our rigorous optimizations identified pyridines **1b** and **1c** as model candidates for this study. Chlorinated **1b-Cl** and **1c-Cl** and their non-chlorinated counterparts **1b** and **1c** could be observed by <sup>1</sup>H NMR at -90 °C in acetone-*d*<sub>6</sub>. This enables the integration of each

individual species (free base and its chlorinated analog) such that the ratios of chlorinated and non-chlorinated counterparts could be obtained.



d. <sup>1</sup>H-NMR analysis of chlorination of 4-methyl-2,6-di-*tert*-butyl pyridine (**1c**):

To rigorously confirm *HalA* assessments on a quantitative scale, we resorted to equilibrium studies of chloropyridinium salts. Addition of 0.5 equiv of CDSC to **1c** in acetone-*d*<sub>6</sub> at room temperature led to the observation of two species (broad peaks) by <sup>1</sup>H NMR (Figure S3). Lowering the temperature to -30 °C, resulted in two sharp peaks corresponding to **1c** and chlorinated **1c**-Cl in a 1:1 ratio. This demonstrates that **1c** has a slow exchange with its chlorinated form (**1c**-Cl) under the NMR timescale; thus enabling the observation of the chlorinated pyridine and its free base by <sup>1</sup>H-NMR analysis at -30 °C. The bulky *t*-butyl substituents on the *ortho* positions efficiently inhibited the dimerization and the rapid intermolecular transfer of halenium ions. **1c** was

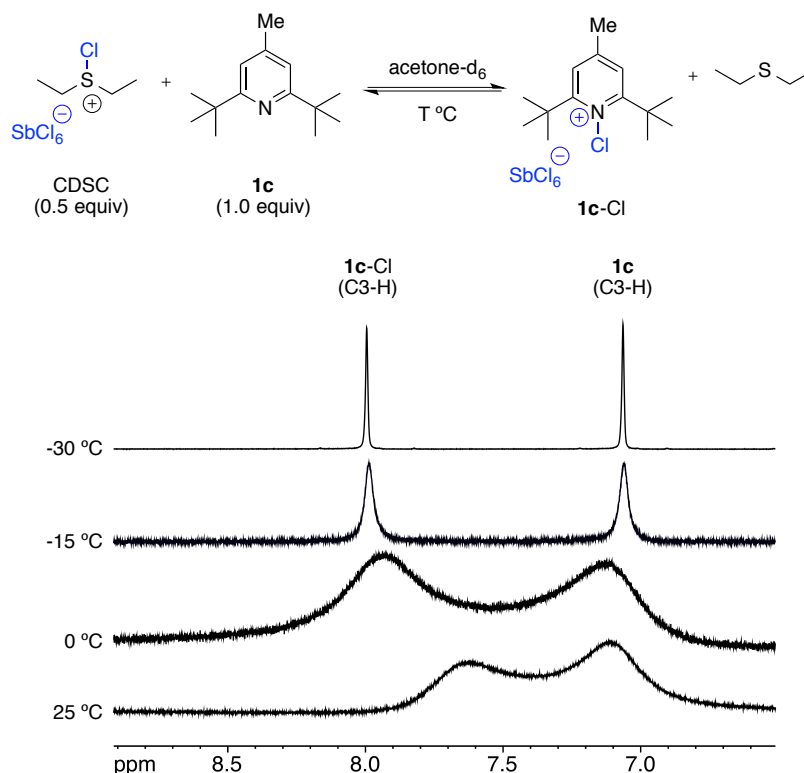

**Figure S3.** <sup>1</sup>H NMR spectra of **1c** at different temperatures under sub-stoichiometric amounts (0.5 equiv) of CDSC.

then titrated with CDSC to observe the ratios of **1c** and **1c-Cl** at -30 °C. Figure S4 shows the overlay of <sup>1</sup>H NMR spectra (C3-H) with different amounts of CDSC. The resonance at 7.06 ppm corresponds to the free base, while the downfield peak at 8.06 ppm corresponds to **1c-Cl**. Upon addition of 1.0 equiv of CDSC, the resonance at 7.06 ppm disappears, and only **1c-Cl** is observed (8.06 ppm, Figure S4, entry 6).

**e. Formation of halopyridinium salts of **1c** with different halenium donors:**

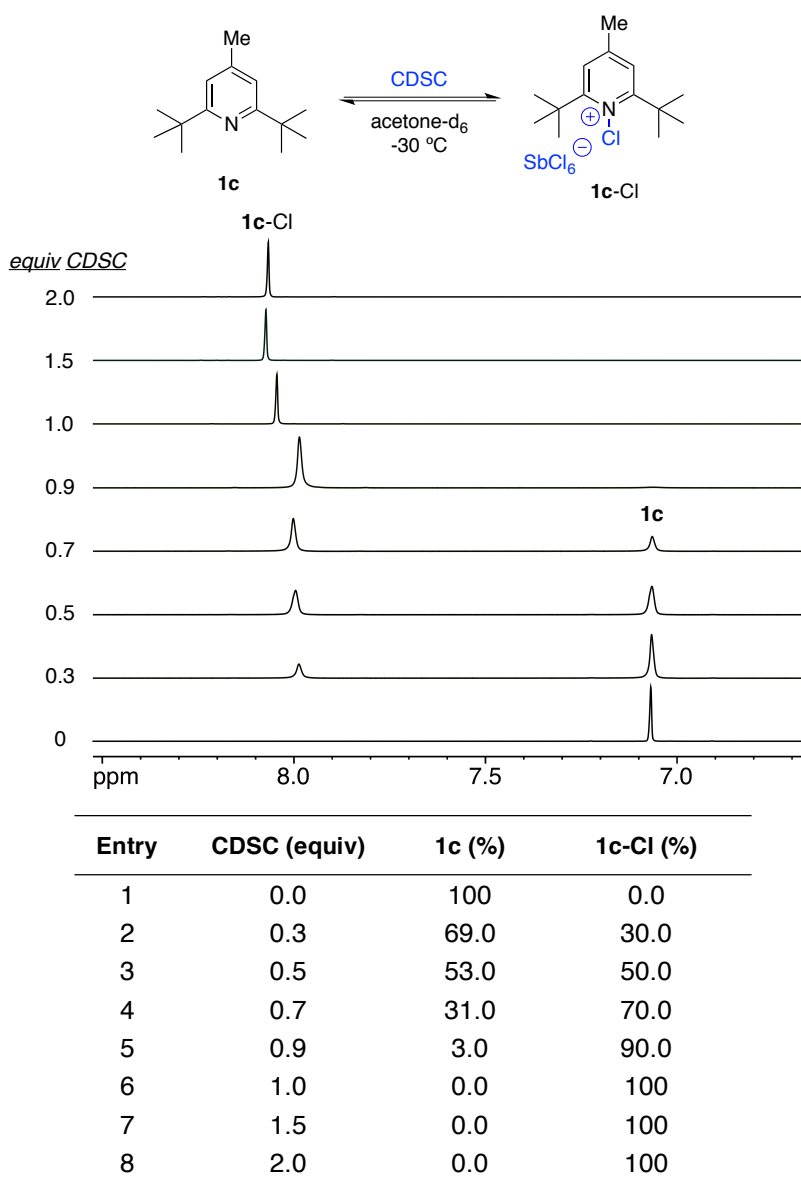

**Figure S4.** Titration data for chlorination of **1c** with CDSC.

Since **1c** and **1c-Cl** can be observed as separate entities under the NMR timescale at -30 °C, we initiated similar studies with different halenium sources to observe the formation of **1c-X** and validate the theoretical *HalA* estimates. The counter anions of DAST and TCCA have a higher *HalA* than **1c** (Table S4, entries 1 and 3) therefore, as anticipated, <sup>1</sup>H NMR showed no evidence of their transferring halenium ion. Similarly, as expected from the *HalA* values, only CDSC, BDSB and IDSI led to a complete transfer of halenium ion to **1c** forming the corresponding halo-pyridinium salts (Table S4, entries 4-6).

**Table S4.** Absolute *HalA* values and experimentally observed ratios of **1c** and **1c-X** using different halenium ion sources. Since SM8 is not compatible for elements >Kr, the gas phase *HalA* values are depicted for comparison of the halenium (F, Cl, Br and I) sources.

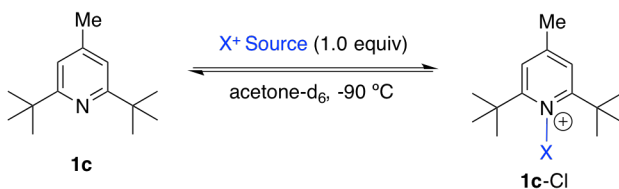

| Entry | Halenium source | Halenium ion (X) | <i>HalA</i> (X) of <b>1c</b> gas phase (kcal/mol) | <i>HalA</i> of Halenium source gas phase (kcal/mol) | ( <b>1c-Cl</b> )% |
|-------|-----------------|------------------|---------------------------------------------------|-----------------------------------------------------|-------------------|
| 1     | DAST            | F <sup>+</sup>   | 287.9                                             | 432.2                                               | 0.0               |
| 2     | XtF             | F <sup>+</sup>   | 287.9                                             | 294.7                                               | 47.0              |
| 3     | TCCA            | Cl <sup>+</sup>  | 153.1                                             | 253.0                                               | 0.0               |
| 4     | CDSC            | Cl <sup>+</sup>  | 153.1                                             | 161.3                                               | 100               |
| 5     | BDSB            | Br <sup>+</sup>  | 160.4                                             | 133.2                                               | 100               |
| 6     | IDSI            | I <sup>+</sup>   | 118.4                                             | 96.7                                                | 100               |

### f. Quantitative analysis *via* competition experiments:

The optimized conditions mentioned above were employed to study the competition for chloronium ion capture between **1a** and **1c**. Since, **1a** has a 15.0 kcal/mol higher chloronium affinity than **1c**, halonium ions should preferentially bind to **1a** over **1c** with an equilibrium constant  $> 10^{10}$ . As shown by the  $^1\text{H-NMR}$  spectra overlay (Figure S5), titration of the pre-formed **1c-Cl** complex with **1a** leads to a corresponding decrease in the concentration of **1c-Cl** as the chloronium ion is now transferred onto the stronger Lewis base **1a** (intensity of the peak at 8.06 ppm for **1c-Cl** decreases while the intensity of the peak at 7.06 ppm which corresponds to free **1c**, increases). Moreover, a careful inspection of Figure S5 indicates a downfield shift of the

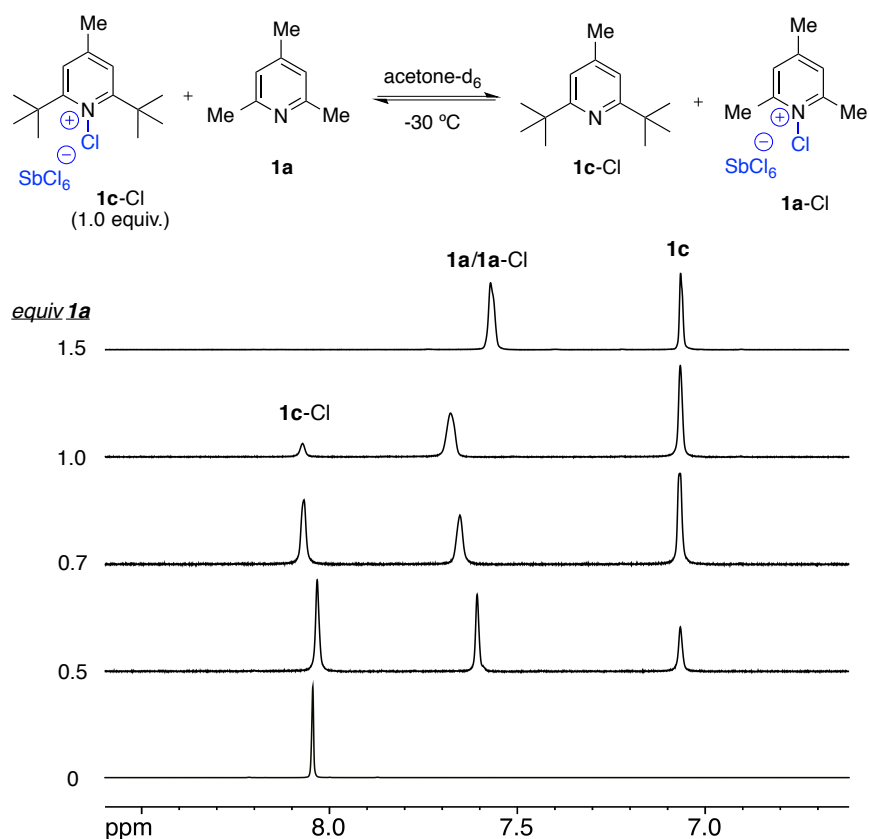

**Figure S5.** Quantification of *HalA* assessment *via* competitive chlorination between **1c** and **1a**.

chlorinated species **1a-Cl** and **1c-Cl** until the mixture is titrated with 1.0 equiv of **1a**, a Lewis base capable of undergoing dimerization (as discussed earlier). The fraction of **1c-Cl** listed in Table S5 is derived from the integration of these two peaks corresponding to **1c** and **1c-Cl**. Formation of **1a-Cl** is also revealed by the downfield shift of C3-H of **1a**. The fraction of **1a-Cl** (Table S5) is derived by correlating its observed chemical shift to its titration data (Figure S2). Similarly, as shown below (Figure S6), the fraction of **1c-Cl** and **1a** was plotted against the number of equivalents of **1a** added.

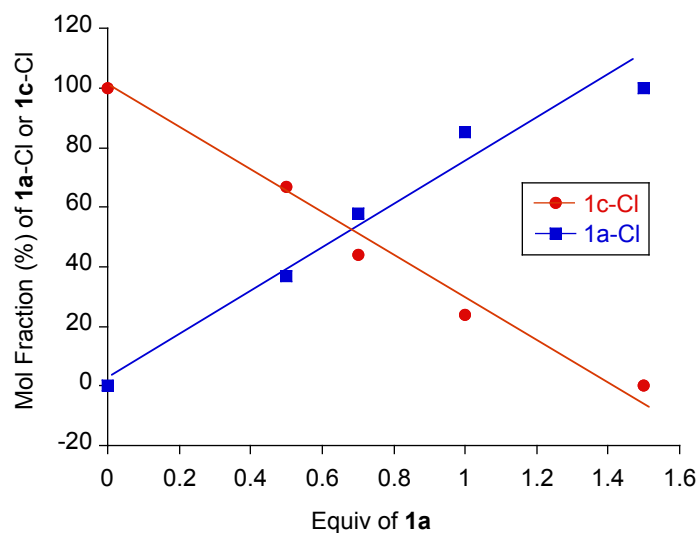

**Figure S6.** Plot for mol fraction (%) of **1a-Cl** and **1c-Cl** vs equiv of **1a** added.

**Table S5.** Data for titration of **1c-Cl** with **1a**.  $Ha/A (Cl)_{1c} = 127.2$  kcal/mol (SM8-acetone).  $Ha/A (Cl)_{1a} = 148.2$  kcal/mol (SM8-acetone).

| Entry | 1a (equiv) | (1c-Cl)% | (1a-Cl)% |
|-------|------------|----------|----------|
| 1     | 0.0        | 100      | 0.0      |
| 2     | 0.5        | 67.0     | 37.0     |
| 3     | 0.7        | 44.0     | 58.0     |
| 4     | 1.0        | 16.0     | 85.0     |
| 5     | 1.5        | 0.0      | 100      |

Note: Although our NMR analysis conditions were chosen to minimize exchange and dimerization of **1c** and **1c-Cl**, the formation of hetero-dimers of **1c-Cl** with free **1a** is possible, and dimerization of **1a** with **1a-Cl** certainly occurs even under low temperature

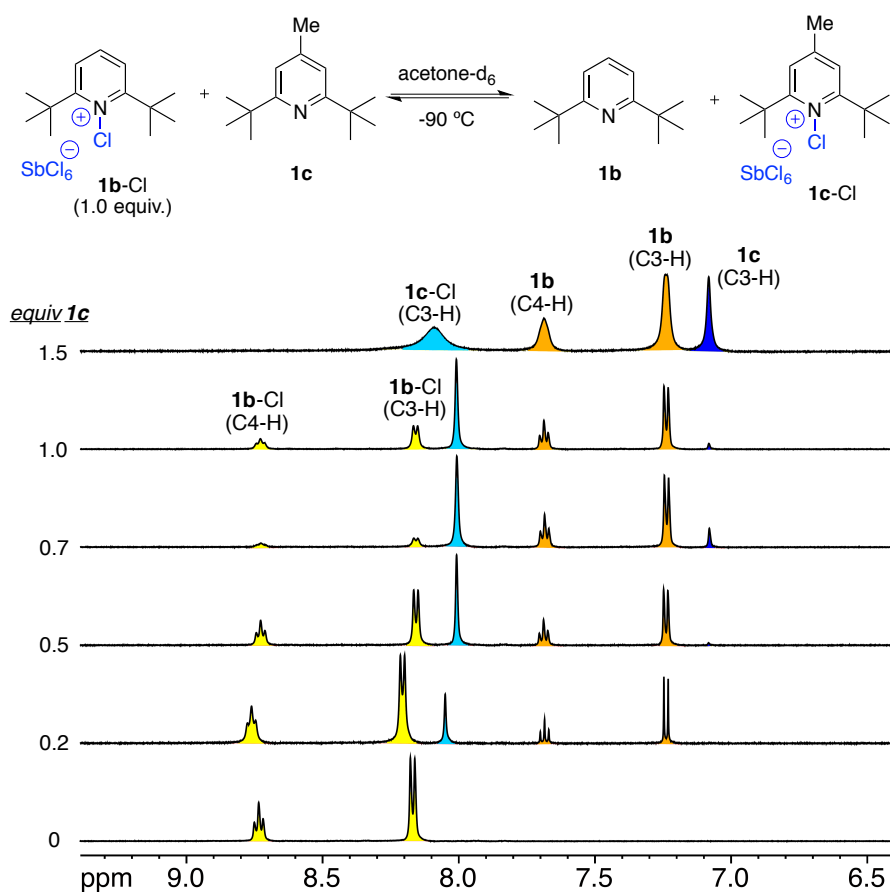

**Figure S7.** Overlay of  $^1\text{H}$  NMR spectra displaying the titration of **1b-Cl** with **1c**.

**Table S6.** Data for titration of **1c**-Cl with **1b**.  $HalA (Cl)_{1c} = 127.2$  kcal/mol.  $HalA (Cl)_{1b} = 126.1$  kcal/mol (B3LYP/6-31G\*/SM8-acetone).

| Entry | 1c (equiv) | (1b-Cl)% | (1c-Cl)% |
|-------|------------|----------|----------|
| 1     | 0.0        | 100      | 0.0      |
| 2     | 0.2        | 82.0     | 100.0    |
| 3     | 0.3        | 69.0     | 97.0     |
| 4     | 0.5        | 58.0     | 98.0     |
| 5     | 0.6        | 37.0     | 93.0     |
| 6     | 0.7        | 36.7     | 95.0     |
| 7     | 0.9        | 19.8     | 86.2     |
| 8     | 1.0        | 12.0     | 88.0     |
| 9     | 1.5        | 0.0      | 56.0     |

condition in the presence of sub-stoichiometric amounts of halonium ion source.

To thwart the competing dimerization, we resorted on competition studies using 2,6-di-*tert*-butylpyridine (**1b**) and **1c**. At -90 °C in acetone-*d*<sub>6</sub> the free bases **1b** and **1c** were distinctly observed from the corresponding chloropyridiniums **1b**-Cl and **1c**-Cl by <sup>1</sup>H-NMR. The fraction of free bases **1b** and **1c** was derived simply by integration of the corresponding peaks at 7.06 (**1c**) and 8.06 (**1c**-Cl) ppm (see Figure S7). Furthermore, the C3-H resonances of **1b** and **1b**-Cl were distinctly observable at 7.24 and 8.16 ppm, respectively, whereas the corresponding C4-H could be observed at 7.69 and 8.73 ppm. The overlay of <sup>1</sup>H-NMR spectra at different equivalents of **1c** is shown in Figure S7. As the spectra show, addition of the stronger Lewis base **1c** depletes **1b**-Cl, confirming the equilibrium shift anticipated by *HalA* calculations. When an equimolar mixture of **1b** and **1c** was treated with 1.0 equiv of CDSC, an equilibrium mixture of **1b**-Cl and **1c**-Cl (in a 1:7 ratio, Table S6, entry 8) was observed by <sup>1</sup>H-NMR. The experimental result is in complete accord with the theoretical *HalA* predictions at the B3LYP/6-31G\*/SM8 (acetone) level of theory ( $\Delta HalA$  at -90 °C = 1.1 kcal/mol; predicting a 1:7 ratio). The

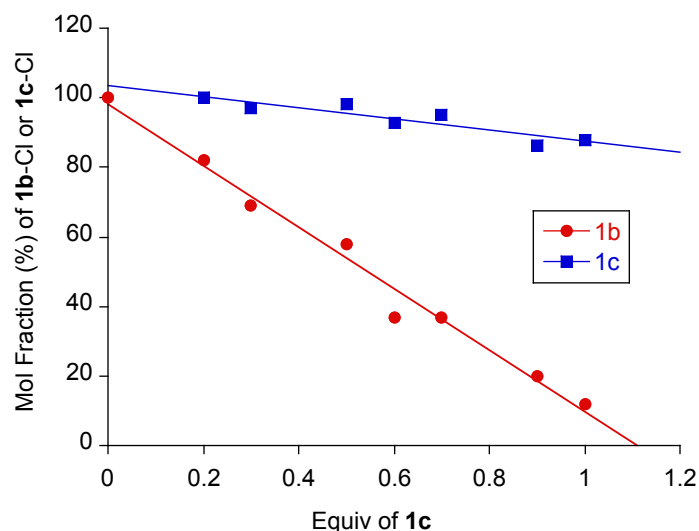

**Figure S8.** Plot for mol fraction (%) of **1b-Cl** and **1c-Cl** vs equiv of **1c** added.

fraction of chlorinated **1b** and **1c** were plotted against the equivalents of added **1c** (Figure S8). This study not only validates quantification via *HalA* but also highlights its value in predicting the outcome of reactions involving subtle steric and electronic changes.

The competition reaction between **1b** and **1c** was repeated at different temperatures (ranging from -90 °C to -30 °C) to probe the effect on chlorenium ion

**Table S7.** Effect of temperature on equilibrium ratios of **1b-Cl** and **1c-Cl** in presence of their free bases **1b** and **1c**.

| Entry | Temperature (°C) | $\Delta HalA$ (kcal/mol) at T °C | (1b-Cl)% | (1c-Cl)% |
|-------|------------------|----------------------------------|----------|----------|
| 1     | -30              | 1.104                            | 17.0     | 88.0     |
| 2     | -50              | 1.094                            | 20.0     | 87.0     |
| 3     | -70              | 1.091                            | 22.0     | 85.0     |
| 4     | -90              | 1.081                            | 21.0     | 83.0     |



transfer. Table S7 displays the fraction of chlorinated **1b** and **1c** at different temperatures (listed *HalA* values were calculated using the SM8 model to simulate acetone). The calculated  $\Delta HalA$  values decrease upon lowering the temperature, which is in agreement with the experimental results (fraction of **1c** that is chlorinated drops from 88.0 to 83.0 %). Note that a slight excess of chlorenium donor is reflected in the >100% sum of these percentages.

**g. Competition study for chlorenium ion transfer from 1c-Cl to pyridines derivatives (a quantitative trend):**

Having qualitatively and quantitatively validated the chlorenium ion transfers, **1c** was subjected to similar competition studies with a series of pyridines exhibiting different electronic and steric profiles. Pyridine derivative (**A**) with a lower inherent *HalA* than **1c** was chlorinated by its reaction with CDSC. To this chloropyridinium complex **A-**

**Table S8.** Data for observed equilibrium ratios when 1.0 equiv of **1c** is added to chloropyridinium derivatives **1(a-j)-Cl**. *HalA* values are estimated at the B3LYP/6-31G\*/SM8 (acetone) level of theory.

| Entry | Pyridine Derivatives (A)         | <i>HalA</i> (A) (kcal/mol) | <i>HalA</i> (1c) (kcal/mol) | $\Delta HalA$ (kcal/mol) | (1c-Cl)% |
|-------|----------------------------------|----------------------------|-----------------------------|--------------------------|----------|
| 1     | <b>1f</b> (4-CN)                 | 138.0                      | 127.2                       | +10.8                    | 100      |
| 2     | <b>1e</b> (4-CF <sub>3</sub> )   | 137.2                      | 127.2                       | +10.0                    | 97       |
| 3     | <b>1b</b> (2,6-di- <i>t</i> -Bu) | 126.1                      | 127.2                       | -1.1                     | 88       |
| 4     | <b>1g</b> (4-Br)                 | 138.8                      | 127.2                       | +11.6                    | 53       |
| 5     | <b>1d</b> (4- <i>t</i> -Bu)      | 146.3                      | 127.2                       | +19.1                    | 4        |
| 6     | <b>1a</b> (2,4,6-trimethyl)      | 148.2                      | 127.2                       | +21.0                    | 0        |
| 7     | <b>1h</b> (4-Ph)                 | 145.7                      | 127.2                       | +18.5                    | 32       |
| 8     | <b>1j</b> (4-NMe <sub>2</sub> )  | 154.3                      | 127.2                       | +27.1                    | 30       |

Cl, 1.0 equiv of **1c** was added and the corresponding ratio at equilibrium was evaluated by  $^1\text{H}$  NMR. As shown in Table S8 (entry 1-3), the difference in *HaIA* between **1c** and the corresponding pyridine derivative **1f**, **1e**, and **1b** correlates to the observed equilibrium ratio of **1c**-Cl by  $^1\text{H}$  NMR. Thus, the fraction of **1c**-Cl calculated from experimental results complements the theoretical *HaIA* estimates. On the other hand, 4-bromopyridine (**1g**), 4-tert-butylpyridine (**1d**), and 2,4,6-trimethylpyridine (**1a**), which have higher *HaIA* values than **1c** also demonstrate experimental results that comply with the theoretical estimations (entry 4-6). The calculated  $\Delta HaIA$  values decrease upon

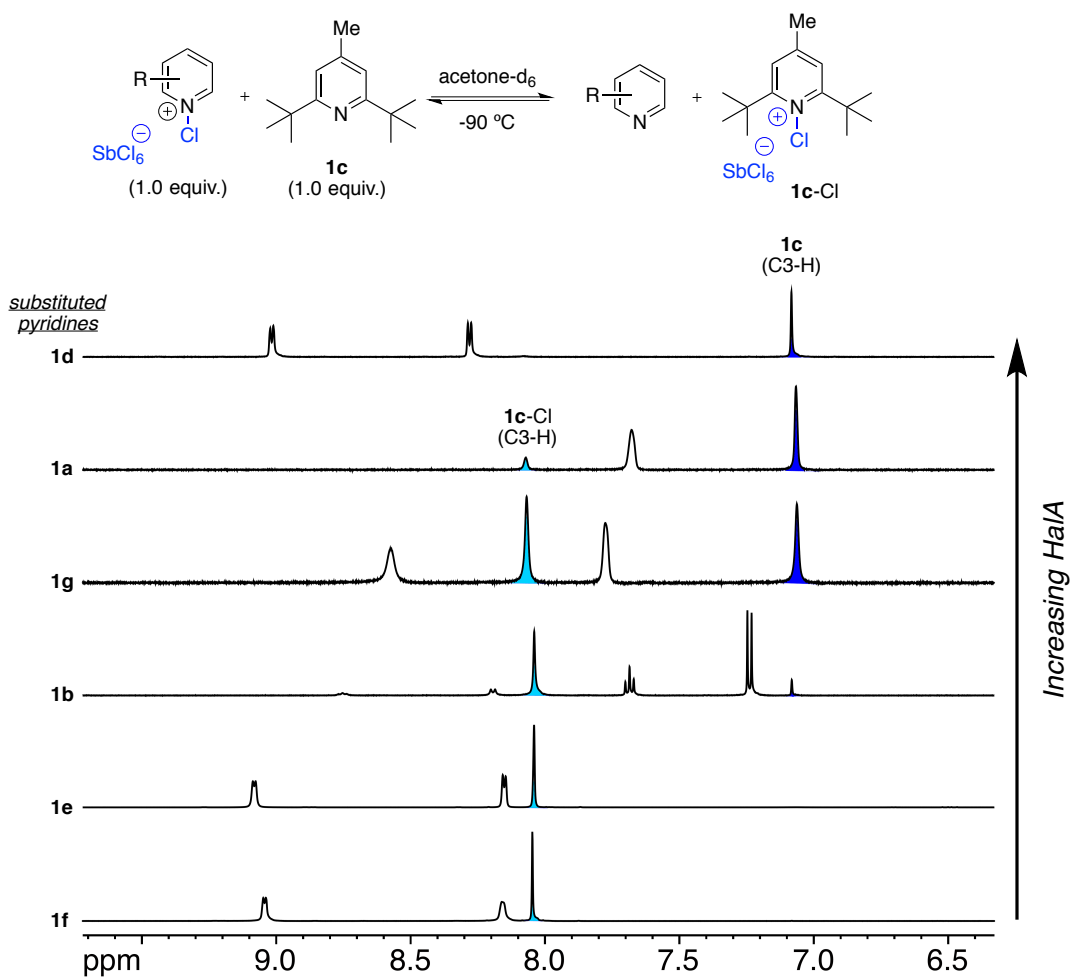

**Figure S9.** Overlay of  $^1\text{H}$  NMR spectra displaying equilibrium ratios when chloropyridinium derivatives **1(a-f)**-Cl were treated with 1.0 equiv of **1c**.

lowering the temperature, which is in agreement with the experimental results (fraction of **1c** that is chlorinated drops from 88.0 to 83.0 %). The identity of this precipitated could not be established due to instability of the chlorinated complexes, hence reliable experimental results were not obtained upon chlorination of **1h** and **1j**.

The overlay of  $^1\text{H}$ -NMR spectra of **1c**-Cl in competition with other pyridines is shown in Figure S9. These examples clearly demonstrate the validity of *HalA* as an efficient tool that allows quantitative ranking of halonium ion affinities for Lewis bases.

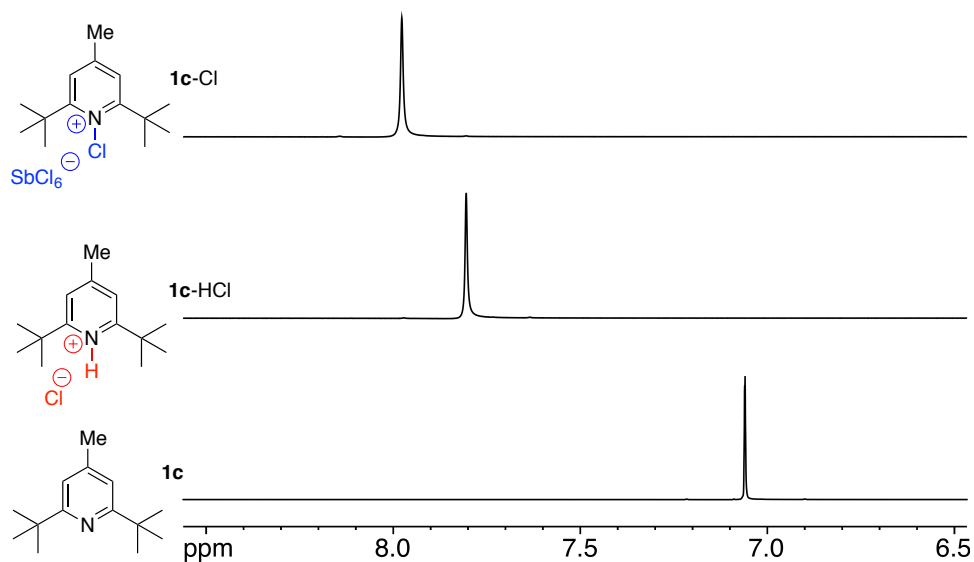

**Figure S10.** Overlay of  $^1\text{H}$  NMR spectra of **1c**-Cl, **1c**-HCl and **1c** displaying their relative chemical shifts.

## h. Control experiments:

The halo-pyridinium salts with antimony (VI) halide as the counter anion were insoluble in most of the commercially available deuterated solvents. Although THF- $d_6$  was efficient in dissolving these salts, it was not economically viable for the entire set of planned experiments. Furthermore, use of acetonitrile- $d_3$  led to Ritter-type reactions causing decomposition of the halo-pyridinium salts. Hence, for all the above experiments involving analyses of halo-pyridinium salts, acetone- $d_6$  was identified as the optimum solvent. We were aware of the possibility that treatment of pyridines with halenium sources in acetone might lead to protonation (rather than chlorination) of the pyridinium nitrogen atom yielding  $\alpha$ -chloroacetone as the end product. The protonated pyridines would exhibit a similar downfield shift of the C3-H and thus lead to an erroneous result. This possibility was ruled out based on our control experiments - 1.) by observing no change in chemical shift of the chloropyridiniums upon addition of  $K_2CO_3$ ,

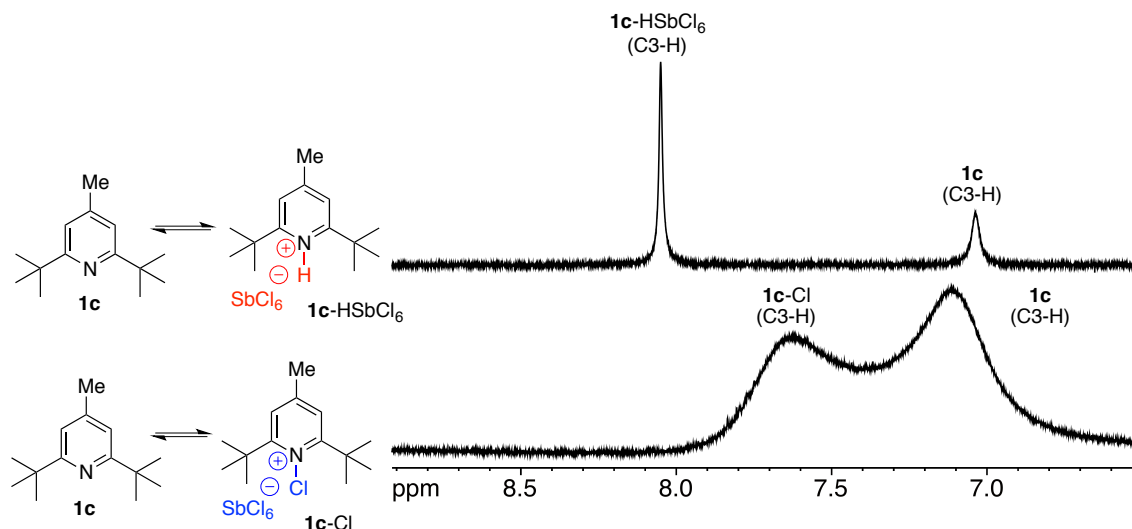

**Figure S11.** Overlay of  $^1\text{H}$  NMR spectra displaying the protonated salt (**1c-HSbCl<sub>6</sub>**) and the analogous chlorinated salt (**1c-Cl**) in presence of the free base (**1c**) in acetone- $d_6$  at room temperature.

2.) by employing THF as a solvent and observing identical behavior as seen with acetone- $d_6$ , and, 3.) by successfully initiating a chlorolactonization of alkenoic acid using the *in situ* generated chloro-pyridinium **1a-Cl**.

1.) To verify whether the species under consideration were chloro-pyridinium salts, we deliberately synthesized their protonated analogs by bubbling HCl gas in the ethereal solution of **1c** at 0 °C followed by filtration of the precipitated salt (**1c-HCl**). The salt was dried and suspended in 1,2-dichloroethane and treated with 1.5 equiv of  $\text{SbCl}_5$  at -40 °C. This yielded the protonated pyridinium- $\text{SbCl}_6$  salt. Having the same counter anion -  $\text{SbCl}_6^-$ ,  $^1\text{H}$  NMR spectra of **1c-H** (protonated salt) and **1c-Cl** (chlorinated salt) were compared in acetone- $d_6$  at room temperature (Figure S11). The equilibrium mixture of **1c** and **1c-Cl** at room temperature shows a set of poorly resolved peaks between 7.0-7.6 ppm. In contrast, the equilibrium mixture of **1c** and **1c-HSbCl<sub>6</sub>** displays a set of two sharp peaks at 7.06 and 8.06 ppm corresponding to the protonated salt and the free base, respectively. The difference in their chemical shifts (ppm) and broadness of the peak clearly confirms the identity of two different species (protonated and chlorinated) and the relative rate of exchange (compared to NMR timescale) under similar conditions. Furthermore, the protonated and chlorinated species shown above were subjected to 1.0 equiv of  $\text{K}_2\text{CO}_3$  and the resulting mixtures were analyzed by  $^1\text{H}$ NMR. Upon addition of  $\text{K}_2\text{CO}_3$  at room temperature, the peak corresponding to **1c-HSbCl<sub>6</sub>** disappeared instantaneously with increased intensity for the peak due to free **1c**. However, addition of  $\text{K}_2\text{CO}_3$  to the equilibrium mixture of **1c** and **1c-Cl** did not lead to any immediate observable change in the intensity or ratio of the free base and its

chlorinated counterpart. When this solution was left at room temperature for over 30 min, some evidence of decomposition of **1c**-Cl was observed by  $^1\text{H}$  NMR. This clearly shows that under the standard optimized conditions, the addition of halenium source leads to the formation of halo-pyridinium salts rather than simple protonation.

2.) Chlorination of **1c** with CDSC was performed using non-deuterated THF as a solvent ( $^1\text{H}$  NMR spectrum at  $-90\text{ }^\circ\text{C}$  was obtained using suppression of THF resonances). A similar behavior (when acetone- $d_6$  was employed) of **1c** and **1c**-Cl was observed leading to two distinct peaks in  $^1\text{H}$  NMR at 7.06 ppm for **1c** and 8.06 ppm for

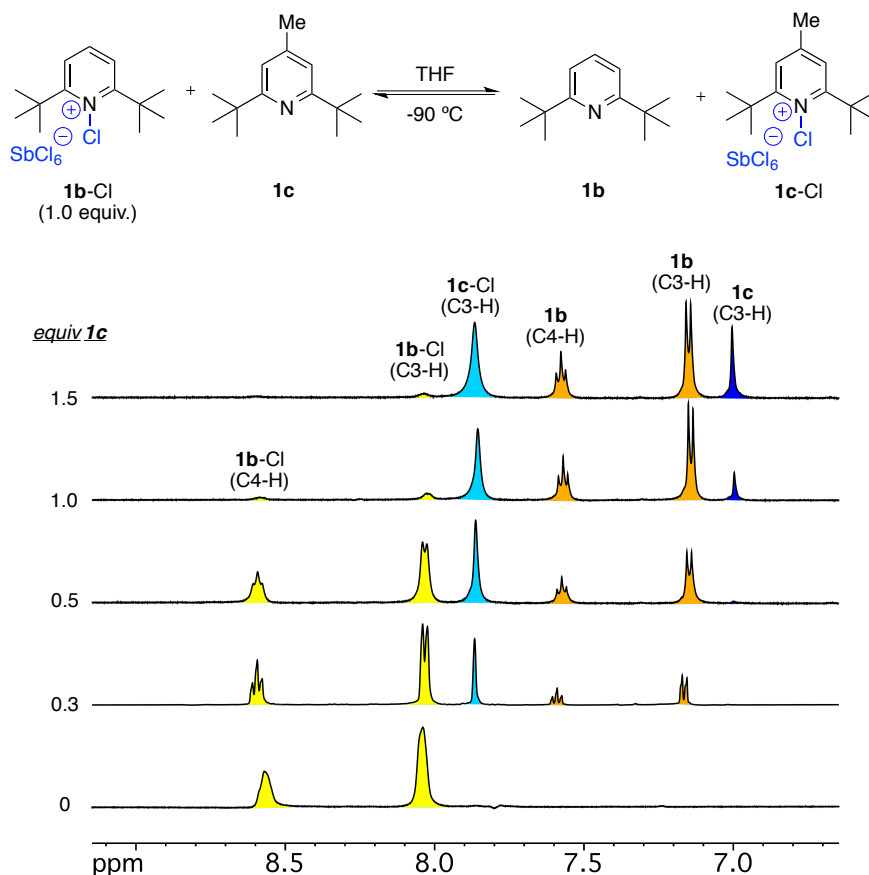

**Figure S12.** Competition for chloronium ion capture between **1b** and **1c** at  $-90\text{ }^\circ\text{C}$  in THF as a solvent. The chemical shifts (ppm) for the free bases (**1b** and **1c**) and the corresponding chloronium salts (**1b**-Cl and **1c**-Cl) are identical to those observed in acetone- $d_6$  at  $-90\text{ }^\circ\text{C}$ .

**1c-Cl** (Figure S12). Since there are no enolizable protons available in THF, the appearance of the downfield peak at 8.06 ppm clearly demonstrates formation of **1c-Cl**.

3.) Finally, the *in-situ* generated complex – **1a-Cl** (using 1.0 equiv each, **1a** and CDSC) in  $\text{CDCl}_3$  was treated with 1.0 equiv of alkenoic acid (**17**) at room temperature (Figure S13). The chlorenium ion from **1a-Cl** was transferred to the alkenoic acid (**17**), successfully initiating a chlorolactonization reaction yielding the chlorolactone (**17a**).

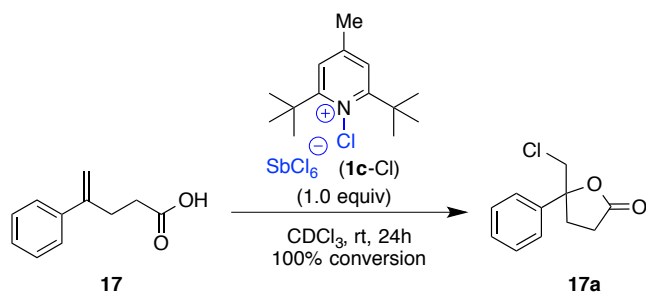

**Figure S13.** Chlorolactonization of **17** using **1c-Cl** as an active chlorenium source.

## V. Synthesis of substrates and intramolecular chlorocyclization of alkenes:

### a. Synthesis of substrates **2**, **4** and **9**:

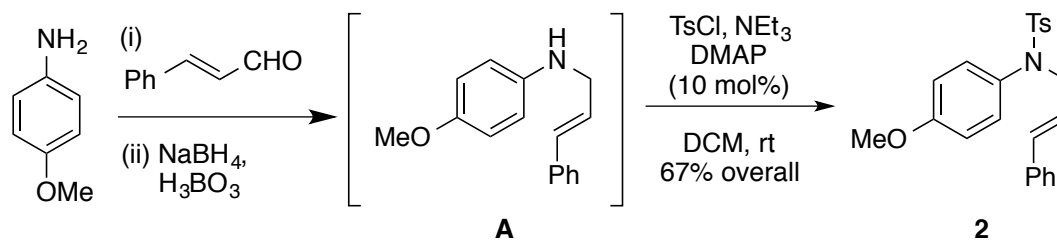

### *N*-cinnamyl-*N*-(4-methoxyphenyl)-4-methylbenzenesulfonamide (**2**):

Intermediate (**A**) was synthesized as reported previously.<sup>7</sup> *p*-Anisidine (1.0 g, 8.12 mmol) was placed in a porcelain mortar along with freshly distilled *trans*-cinnamaldehyde (1.02 mL, 1.0 equiv, 8.12 mmol). This mixture was grinded using a pestle for about 10 min until a bright yellow solid was obtained. Part of this mixture was analyzed by  $^1\text{H}$  NMR to verify completion of the reaction (imine formation is quantitative). To this crude imine, a 1:1 mixture (pre-mixed) of  $\text{NaBH}_4$  (768 mg, 2.5 equiv, 20.3 mmol) and  $\text{H}_3\text{BO}_3$  (1.26 g, 2.5 equiv, 20.3 mmol) were added at once. Mixing was continued using mortar and pestle for another 20 min until a dry yellow solid was obtained. The reaction mixture was then transferred to a separatory funnel. The mortar was washed with  $\text{CH}_2\text{Cl}_2$  (15 mL) and the washings were transferred to the same separatory funnel. This solution was then washed with 50% aqueous  $\text{NaHCO}_3$  solution following by 5 mL of brine. The organics were separated, dried over anhydrous  $\text{Na}_2\text{SO}_4$ , filtered, concentrated and then subjected to the next step without further purification. The crude amine **A** was transferred to a 100 mL round bottom flask and dissolved in dry  $\text{CH}_2\text{Cl}_2$  (10 mL). To this mixture were added  $\text{NEt}_3$  (2.3 mL, 2.0 equiv, 16.24 mmol) and



4-(*N,N*-dimethylamino)pyridine (91 mg, 0.1 equiv, 0.81 mmol) followed by tosyl chloride (1.86 g, added in 3 portions). This mixture was allowed to stir for 5 h at room temperature and the progress of the reaction was monitored by thin layer chromatography (TLC). Upon completion of the reaction, the organics were poured in a separatory funnel and washed with satd. aqueous NaHCO<sub>3</sub> solution. The organics were separated, dried over anhydrous Na<sub>2</sub>SO<sub>4</sub>, filtered, concentrated and subjected to purification using silica gel column chromatography employing 20% ethyl acetate in hexanes as eluent. Pure product **2** was obtained as a white solid (2.14 g, 67% overall yield).

Analytical data for **2**: White solid, mp 79 °C; <sup>1</sup>H NMR (500 MHz, CDCl<sub>3</sub>) δ 7.54-7.51 (2H, m.), 7.26-7.20 (7H, m.), 6.98-6.94 (2H, m.), 6.79-6.76 (2H, m.), 6.35 (1H, dd, *J* = 16.0, 5.0 Hz), 6.13-6.06 (1H, m.), 4.29 (2H, ddd, *J* = 1.5, 5.0, 11.0 Hz), 3.76 (3H, s.), 2.42 (3H, s.) ppm; <sup>13</sup>C NMR (125 MHz, CDCl<sub>3</sub>) δ 159.0, 143.3, 136.4, 135.7, 133.7, 131.7, 129.4, 129.4, 128.5, 127.8, 126.4, 124.2, 114.1, 55.3, 53.6, 21.6 ppm; IR (film) 3019, 2932, 2837, 1595, 1507 (s), 1447, 1346 (s), 1249, 1162 (s), 684 cm<sup>-1</sup>. HRMS (ESI) Calculated Mass for C<sub>23</sub>H<sub>24</sub>NO<sub>3</sub>S: ([M+H]<sup>+</sup>) = 394.1477, Found ([M+H]<sup>+</sup>) = 394.1478.

***N*-cinnamyl-4-methyl-*N*-(3,4,5-trimethoxyphenyl)benzenesulfonamide (**4**):**

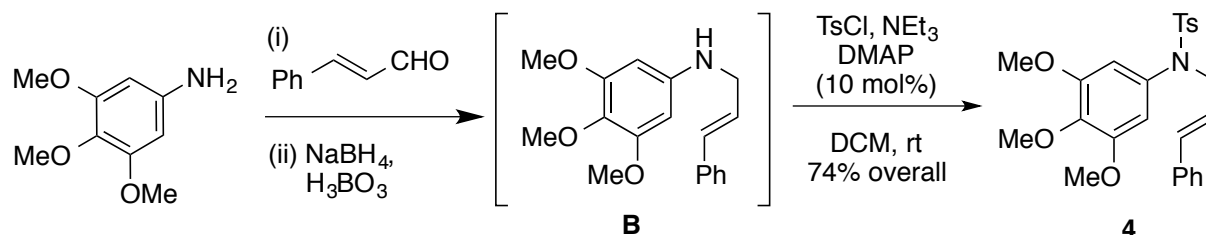

The same procedure used for the synthesis of **2** (as described above) was employed for the synthesis of **4**. Using 1.0 g (5.5 mmol) of 3,4,5-trimethoxyaniline, pure product (**4**) was isolated (2.14 g, 74% overall yield).

Analytical data for **4**: White solid, mp 121 °C; <sup>1</sup>H NMR (500 MHz, CDCl<sub>3</sub>) δ 7.58 (2H, dd, *J* = 8.0 Hz.), 7.27-7.19 (7H, m.), 6.38 (1H, d, *J* = 16.0 Hz.), 6.23 (2H, s.), 6.10 (1H, ddd, *J* = 6.5, 13.5, 16.0 Hz), 4.27 (2H, dd, *J* = 1.0 Hz, 7.0 Hz.), 3.80 (3H, s.), 3.66 (6H, s.), 2.41 (3H, s.) ppm; <sup>13</sup>C NMR (125 MHz, CDCl<sub>3</sub>) δ 153.0, 143.6, 137.7, 136.3, 135.7, 134.8, 133.9, 129.4, 128.6, 127.9, 127.8, 126.4, 124.1, 106.5, 60.9, 56.1, 53.7, 21.5 ppm; IR (film) 3000, 2938, 2837, 1595 (s), 1503, 1454, 1416, 1347, 1232, 1163 (s), 1128 (s), 661 cm<sup>-1</sup>. HRMS (ESI) Calculated Mass for C<sub>25</sub>H<sub>28</sub>NO<sub>5</sub>S: ([M+H]<sup>+</sup>) = 454.1688, Found ([M+H]<sup>+</sup>) = 454.1685.

***N*-cinnamyl-4-methyl-*N*-(2-phenylallyl)benzenesulfonamide (**9**):**

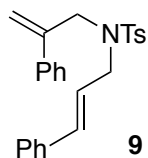

Substrate **9** was synthesized as reported previously.<sup>8</sup>

Analytical data for **9**: Crystalline white solid, mp 130 °C; <sup>1</sup>H NMR (500 MHz, CDCl<sub>3</sub>) δ 7.66 (2H, d, *J* = 8.0 Hz.), 7.39-7.37 (2H, m.), 7.31-7.19 (8H, m.), 7.13 (2H, d, *J* = 6.5 Hz.), 6.30 (1H, d, *J* = 15.5 Hz.), 5.78 (1H, ddd, *J* = 7.0, 14.0 and 16.0 Hz.), 5.45 (1H, apparent singlet.), 5.24 (1H, d, *J* = 1.0 Hz.), 4.26 (2H, s.), 3.86 (2H, d, *J* = 7.0 Hz.), 2.41 (3H, s.) ppm; <sup>13</sup>C NMR (125 MHz, CDCl<sub>3</sub>) δ 143.3, 142.8, 138.5, 137.0, 136.2, 134.1, 129.6, 128.5, 128.4, 128.0, 127.8, 127.4, 126.6, 126.3, 123.4, 116.3, 50.6, 48.9, 21.5 ppm; IR (film) 3056, 3031, 2922, 1599, 1495, 1447, 1340 (s), 1159 (s), 1093, 910, 738, 659 cm<sup>-1</sup>. HRMS (ESI) Calculated Mass for C<sub>25</sub>H<sub>26</sub>NO<sub>2</sub>S: ([M+H]<sup>+</sup>) = 404.1684, Found ([M+H]<sup>+</sup>) = 404.1687.

**b. Chlorocyclization of alkenes **2**, **4** and **9**:**

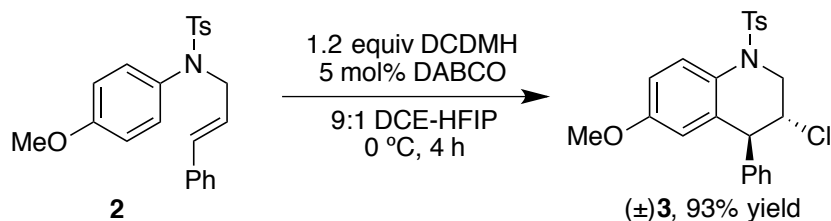

***trans*-3-chloro-6-methoxy-4-phenyl-1-tosyl-1,2,3,4-tetrahydroquinoline (**3**):**

A 5 mL round bottom flask containing a stir bar was charged with **2** (100 mg, 0.25 mmol) and dissolved in a 9:1 mixture of 1,2-dichloroethane:hexafluoroisopropanol (2.5

mL). To this solution 1,4-diazabicyclo[2.2.2]octane (1.5 mg, 0.05 equiv, ~0.01 mmol) was added and the reaction mixture was placed in an ice bath for about 5 min. Subsequently, 1,3-dichloro-5,5-dimethylhydantoin (DCDMH) (60 mg, 1.2 equiv, 0.31 mmol) was added and stirring was continued for another 3.5 h. The progress of the reaction was monitored by TLC and upon complete consumption of substrate **2**, the reaction was quenched with 10% aqueous sodium sulfite (1 mL). The organics were then separated, dried over anhydrous Na<sub>2</sub>SO<sub>4</sub>, filtered, concentrated and subjected to purification using silica gel column chromatography employing 10% ethyl acetate in hexanes as eluent. After purification, pure product **3** was obtained as a white solid (101 mg, 93%).

Analytical data for **3**: White solid, mp 118 °C; <sup>1</sup>H NMR (500 MHz, CDCl<sub>3</sub>) δ 7.82 (1H, d, *J* = 9.0 Hz.), 7.55 (2H, d, *J* = 8.5 Hz.), 7.27 (2H, d, *J* = 8.0 Hz.), 7.19 (1H, t, *J* = 8.0 Hz.), 7.11 (2H, t, *J* = 7.0 Hz.), 6.70 (1H, dd, *J* = 3.0 and 9.5 Hz.), 6.47 (2H, d, *J* = 7.5 Hz.), 6.13 (1H, d, *J* = 2.0 Hz.), 4.65 (1H, dd, *J* = 4.0 and 13.5 Hz.), 3.89 (1H, d, *J* = 9.5 Hz.), 3.76-3.70 (1H, m.), 3.60-3.56 (4H, m.), 2.44 (3H, s.) ppm; <sup>13</sup>C NMR (125 MHz, CDCl<sub>3</sub>) δ 157.4, 144.2, 141.1, 136.3, 133.5, 130.0, 128.8, 128.6, 128.3, 127.5, 127.4, 126.5, 114.9, 113.1, 57.0, 55.2, 54.2, 52.3, 21.5 ppm; IR (film) 3030, 2928, 2838, 1610 (s), 1493 (s), 1356 (s), 1248, 1163 (s), 1037, 910, 801, 736 cm<sup>-1</sup>. HRMS (ESI) Calculated Mass for C<sub>23</sub>H<sub>23</sub>NO<sub>3</sub>ClS: ([M+H]<sup>+</sup>) = 428.1087, Found ([M+H]<sup>+</sup>) = 428.1087.

Attempted chlorocyclization of substrate **4**:

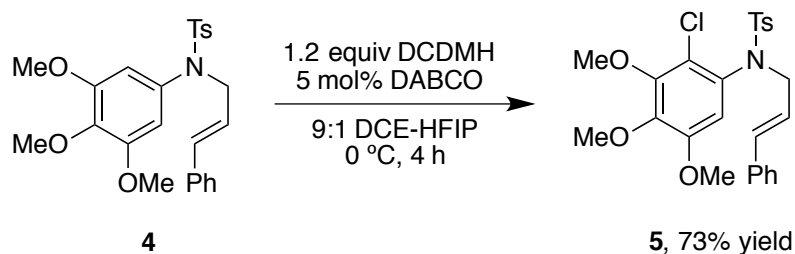

Compound **4** (100 mg, 0.22 mmol) was subjected to the same chlorocyclization conditions (as described above for substrate **2**) and 79 mg (73% yield) of the ring-chlorinated product **5** was obtained as pale yellow oil.

Analytical data for **5**: Pale yellow oil;  $^1\text{H}$  NMR (500 MHz,  $\text{CDCl}_3$ ) two rotamers ( $\sim 2.5:1$  ratio) along *N*-Ts were observed at room temperature. Heating the sample to 50 °C did not lead to complete convergence of the spectral lines corresponding to the rotamers. Major rotamer:  $\delta$  7.68 (1H, d,  $J = 8.0$  Hz.), 7.27-7.19 (10H, m.), 6.54 (1H, s.), 6.30 (1H, d,  $J = 16.0$  Hz.), 6.18 (1H, ddd,  $J = 7.0, 13.5$  and  $16.0$  Hz.), 4.41-4.38 (1H, m.), 4.20-4.14 (1H, m.), 3.86 (3H, s.), 3.80 (3H, s.), 3.68 (3H, s.), 2.41 (3H, s.) ppm;  $^{13}\text{C}$  NMR (125 MHz,  $\text{CDCl}_3$ )  $\delta$  151.5, 150.4, 143.6, 136.3, 134.2, 131.5, 129.6, 129.5, 128.5, 127.9, 127.3, 126.4, 123.9, 111.7, 61.1, 56.1, 53.1, 21.6 ppm; IR (film) 3023, 2940, 1596, 1576, 1485 (s), 1444, 1396, 1351, 1240, 1163 (s), 1112 (s), 1016, 870, 661  $\text{cm}^{-1}$ . HRMS (ESI) Calculated Mass for  $\text{C}_{25}\text{H}_{27}\text{NO}_5\text{ClS}$ :  $([\text{M}+\text{H}]^+)$  = 487.1220, Found  $([\text{M}+\text{H}]^+)$  = 487.1221.

Chlorocyclization of substrate **9**:

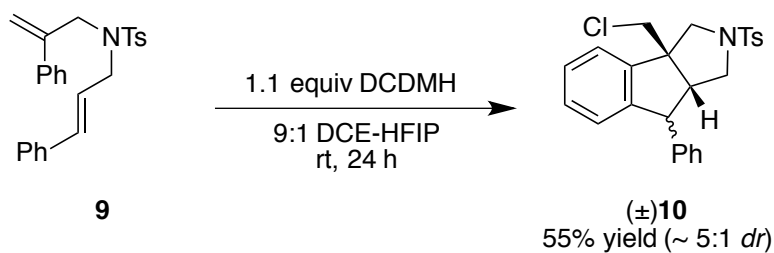

In a 5 mL round bottom flask containing a stir bar, **9** (100 mg, 0.25 mmol) was dissolved in a 9:1 mixture of 1,2-dichloroethane:hexafluoroisopropanol (2.5 mL). Then, 1,3-dichloro-5,5-dimethylhydantoin (DCDMH) (54 mg, 1.1 equiv, 0.27 mmol) was added and the reaction mixture was stirred for 24 h. The progress of the reaction was monitored by TLC and upon complete consumption of substrate **9**, the reaction was quenched with 10% aqueous sodium sulfite (1 mL). The organics were then separated, dried over anhydrous Na<sub>2</sub>SO<sub>4</sub>, filtered, concentrated and subjected to purification using silica gel column chromatography employing 20% ethyl acetate in hexanes as eluent. After purification, product **10** was obtained as a white solid (60 mg, 55% yield). Crude <sup>1</sup>H NMR analysis indicated a 5:1 *dr* for **10**. Although complete conversion of **9** was attained (as judged by TLC and <sup>1</sup>H NMR), the mass balance was accounted by a complex mixture of products, which were inseparable by chromatography (identity of these products could not be assigned due to overlapping peaks in NMR). An analytically pure sample of **10** was obtained *via* preparative TLC. The relative stereochemistry of the major diastereomer could not be assigned with the aid of NOESY experiments owing to the nature of *cis*-(5,5) fusion in the tricyclic framework of **10**.

Analytical data for **10**: White waxy solid;  $^1\text{H}$  NMR (500 MHz,  $\text{CDCl}_3$ ) 5:1 *dr*, major diastereomer:  $\delta$  7.67 (2H, d,  $J = 8.0$  Hz.), 7.32-7.20 (8H, m.), 7.07 (2H, d,  $J = 7.5$  Hz.), 6.89 (1H, d,  $J = 8.0$  Hz.), 4.15 (1H, d,  $J = 5.5$  Hz.), 3.67 (2H, s.), 3.47 (2H, dd,  $J = 3.5$  and 9.5 Hz.), 3.34 (1H, d,  $J = 9.5$  Hz.), 3.28 (1H, dd,  $J = 6.5$  and 9.5 Hz.), 2.88 (1H, ddd,  $J = 2.5, 6.5$  and 8.5 Hz.), 2.42 (3H, s.) ppm;  $^{13}\text{C}$  NMR (125 MHz,  $\text{CDCl}_3$ )  $\delta$  145.4, 144.1, 144.0, 143.9, 132.0, 129.7, 128.8, 128.8, 128.1, 127.9, 127.0, 125.7, 123.3, 60.0, 57.5, 56.7, 53.9, 49.9, 21.6 ppm; IR (film) 3928, 2961, 2867, 1598, 1453, 1349 (s), 1260, 1165 (s), 1099, 1026, 911, 807, 702, 665  $\text{cm}^{-1}$ . HRMS (ESI) Calculated Mass for  $\text{C}_{25}\text{H}_{25}\text{NO}_2\text{ClS}$ : ( $[\text{M}+\text{H}]^+$ ) = 438.1295, Found ( $[\text{M}+\text{H}]^+$ ) = 438.1297.

## VI. Quantum mechanical modeling studies:

Based on the nature of halonium ion (F, Cl, Br or I), full optimizations for all conformations of the 'halonium ion' acceptors and the corresponding 'Lewis base-halonium ion' complexes were performed using density functional calculations at the B3LYP/6-31G\* level (with the LANL2DZ(d) pseudopotential and basis used for iodine) as implemented in the Spartan-10 software running on Macintosh and Linux platforms. To confirm that each structure was a true minimum, vibrational analyses were performed. For structures presented in Figure 2, Figure 5b and Figure 6 in the manuscript, the *HalA* (Cl) values were calculated using the energies obtained from a full geometry optimization of the structures in simulated acetone at B3LYP/6-31G\*/SM8 level of theory. Alternatively, when the *gas phase* energies of the same structures were corrected for solvation in simulated acetone using the SM8 model available in the Spartan code to run single point (i.e. B3LYP/6-31G\*/SM8) calculations, the resulting data led to the same conclusion. To verify convergence and consistency of the optimizations, a number of examples were re-optimized from multiple starting points; energetic variations of 0.02 kcal/mol or less were found among these calculated structures. Relative enthalpies  $\Delta H^\circ_{\text{rel}}$  were calculated for the *gas phase* structures by including zero-point and thermal corrections to 298.15 K. Importantly, neither the vibration nor the solvation corrections introduced differences between relative  $E^\circ$  and relative  $H^\circ$  values that were large enough to reorder the relative energy structures; thus, either set of data led to the same conclusions.



### Cartesian coordinates for geometry minimized styrene:

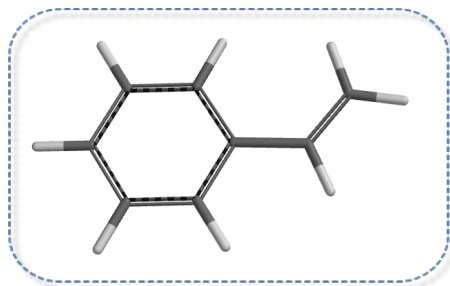

| Atom |       | X          | Y          | Z          |
|------|-------|------------|------------|------------|
| 1    | H H1  | 3.8906963  | -0.1039465 | 0.0006791  |
| 2    | C C1  | 2.8698467  | 0.2657609  | 0.0010817  |
| 3    | C C2  | 1.8324097  | -0.5808014 | -0.0009399 |
| 4    | H H2  | 2.7517904  | 1.3461327  | 0.0033224  |
| 5    | H H3  | 2.0454119  | -1.6501016 | -0.0027489 |
| 6    | C C3  | 0.3985202  | -0.2467405 | -0.0006402 |
| 7    | C C4  | -2.3724006 | 0.2865908  | 0.0003848  |
| 8    | C C5  | -0.0834339 | 1.0750850  | -0.0010208 |
| 9    | C C6  | -0.5422606 | -1.2906386 | 0.0000292  |
| 10   | C C7  | -1.9121771 | -1.0300166 | 0.0005909  |
| 11   | C C8  | -1.4498423 | 1.3375891  | -0.0004488 |
| 12   | H H6  | 0.6174931  | 1.9048299  | -0.0018638 |
| 13   | H H7  | -0.1890770 | -2.3197190 | 0.0002462  |
| 14   | H H8  | -2.6188624 | -1.8558522 | 0.0012169  |
| 15   | H H9  | -1.7991778 | 2.3669659  | -0.0007321 |
| 16   | H H10 | -3.4389364 | 0.4948622  | 0.0008431  |

### Cartesian coordinates for geometry minimized styrene + F cation:

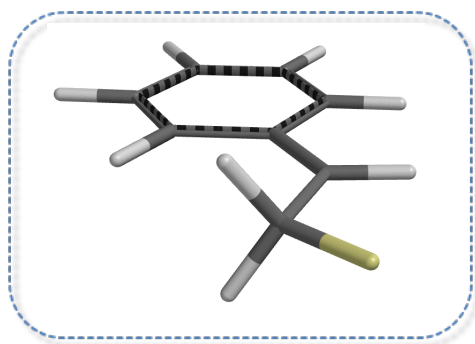

| Atom |      | X         | Y          | Z          |
|------|------|-----------|------------|------------|
| 1    | H H2 | 2.8006008 | 0.8488801  | 0.6519632  |
| 2    | C C1 | 2.7085660 | 0.2902544  | -0.2938554 |
| 3    | C C2 | 1.5334306 | -0.6181780 | -0.2430910 |
| 4    | H H3 | 2.5850185 | 1.0299477  | -1.1015570 |
| 5    | H H4 | 1.7830570 | -1.6715264 | -0.3782480 |
| 6    | C C3 | 0.2035457 | -0.2816827 | -0.0507188 |

|    |   |     |            |            |            |
|----|---|-----|------------|------------|------------|
| 7  | C | C4  | -2.5045408 | 0.2809256  | 0.3249902  |
| 8  | C | C5  | -0.2361024 | 1.0744593  | 0.1365294  |
| 9  | C | C6  | -0.7692893 | -1.3400906 | -0.0410085 |
| 10 | C | C7  | -2.1064585 | -1.0547618 | 0.1451608  |
| 11 | C | C8  | -1.5733418 | 1.3422209  | 0.3209874  |
| 12 | H | H6  | 0.4856653  | 1.8855877  | 0.1324170  |
| 13 | H | H7  | -0.4356001 | -2.3641986 | -0.1821204 |
| 14 | H | H8  | -2.8453117 | -1.8490166 | 0.1531099  |
| 15 | H | H9  | -1.9168737 | 2.3614270  | 0.4627659  |
| 16 | H | H10 | -3.5578961 | 0.5047057  | 0.4714904  |
| 17 | F | F1  | 3.8455304  | -0.4389539 | -0.5088152 |

**Cartesian coordinates for geometry minimized styrene + Cl cation:**

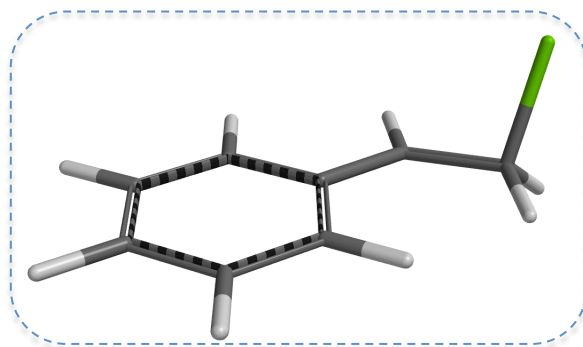

| Atom |    | X   | Y          | Z          |            |
|------|----|-----|------------|------------|------------|
| 1    | Cl | C11 | 3.2758162  | 0.0329725  | -1.8063251 |
| 2    | H  | H2  | 3.5289469  | -0.0248172 | 0.5680118  |
| 3    | C  | C1  | 2.7218866  | 0.2924718  | -0.0971674 |
| 4    | C  | C2  | 1.5507764  | -0.6129596 | -0.0072821 |
| 5    | H  | H3  | 2.5110803  | 1.3505918  | 0.0440545  |
| 6    | H  | H4  | 1.7990723  | -1.6737210 | -0.0222951 |
| 7    | C  | C3  | 0.2067354  | -0.2710434 | 0.0403656  |
| 8    | C  | C4  | -2.5261721 | 0.2862665  | 0.1816959  |
| 9    | C  | C5  | -0.2565230 | 1.0888791  | 0.0506730  |
| 10   | C  | C6  | -0.7568595 | -1.3372371 | 0.0969362  |
| 11   | C  | C7  | -2.1046711 | -1.0552540 | 0.1714872  |
| 12   | C  | C8  | -1.6064943 | 1.3533468  | 0.1197515  |
| 13   | H  | H6  | 0.4526671  | 1.9073041  | -0.0037532 |
| 14   | H  | H7  | -0.4056968 | -2.3653040 | 0.0845860  |
| 15   | H  | H8  | -2.8352386 | -1.8558000 | 0.2181726  |
| 16   | H  | H9  | -1.9665647 | 2.3766974  | 0.1247055  |
| 17   | H  | H10 | -3.5887611 | 0.5076062  | 0.2363835  |

**Cartesian coordinates for geometry minimized styrene + Br cation:**

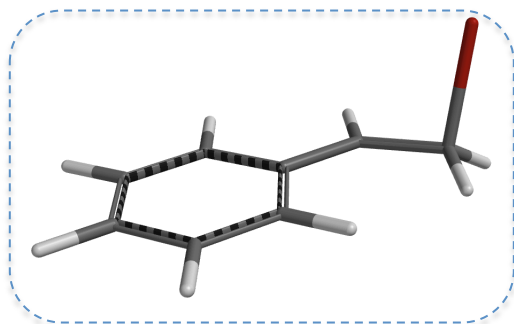

| Atom |        | X          | Y          | Z          |
|------|--------|------------|------------|------------|
| 1    | H H2   | 3.5697360  | -0.0504926 | 0.5475900  |
| 2    | C C1   | 2.7137838  | 0.2913182  | -0.0319186 |
| 3    | C C2   | 1.5582490  | -0.6125257 | 0.0299976  |
| 4    | H H3   | 2.5259948  | 1.3517069  | 0.1031904  |
| 5    | H H4   | 1.8038016  | -1.6736580 | 0.0441067  |
| 6    | C C3   | 0.2050238  | -0.2699339 | 0.0549767  |
| 7    | C C4   | -2.5422655 | 0.2870390  | 0.1691956  |
| 8    | C C5   | -0.2622947 | 1.0902243  | 0.0582713  |
| 9    | C C6   | -0.7607195 | -1.3372320 | 0.1043399  |
| 10   | C C7   | -2.1141792 | -1.0555682 | 0.1637094  |
| 11   | C C8   | -1.6177899 | 1.3545758  | 0.1150925  |
| 12   | H H6   | 0.4442188  | 1.9103845  | 0.0134268  |
| 13   | H H7   | -0.4108292 | -2.3647834 | 0.0969540  |
| 14   | H H8   | -2.8416681 | -1.8570948 | 0.2036541  |
| 15   | H H9   | -1.9764367 | 2.3767833  | 0.1182231  |
| 16   | H H10  | -3.6039676 | 0.5069392  | 0.2149216  |
| 17   | Br Br1 | 3.3093428  | 0.0523175  | -2.0057309 |

**Cartesian coordinates for geometry minimized styrene + I cation at the B3LYP/6-**

**31G\*/LANL2DZ level:**

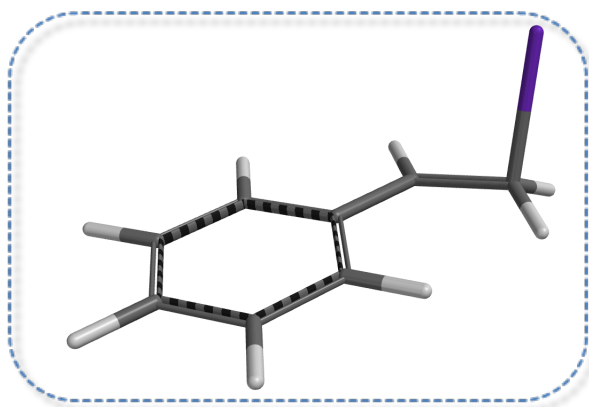

| Atom |       | X          | Y          | Z          |
|------|-------|------------|------------|------------|
| 1    | H H2  | 3.5660177  | -0.0553705 | 0.5724722  |
| 2    | C C1  | 2.7079995  | 0.2982736  | 0.0078013  |
| 3    | C C2  | 1.5599104  | -0.5963249 | 0.0434782  |
| 4    | H H3  | 2.5287101  | 1.3580360  | 0.1445492  |
| 5    | H H4  | 1.8021039  | -1.6548963 | 0.0955743  |
| 6    | C C3  | 0.2014926  | -0.2589280 | 0.0433076  |
| 7    | C C4  | -2.5325765 | 0.2831161  | 0.1677538  |
| 8    | C C5  | -0.2668403 | 1.0894980  | 0.0546987  |
| 9    | C C6  | -0.7508916 | -1.3226186 | 0.0883419  |
| 10   | C C7  | -2.1010179 | -1.0491769 | 0.1523919  |
| 11   | C C8  | -1.6172590 | 1.3483483  | 0.1180072  |
| 12   | H H6  | 0.4334051  | 1.9150566  | 0.0170130  |
| 13   | H H7  | -0.3995600 | -2.3490830 | 0.0759140  |
| 14   | H H8  | -2.8235147 | -1.8555499 | 0.1907949  |
| 15   | H H9  | -1.9779479 | 2.3699122  | 0.1321514  |
| 16   | H H10 | -3.5945859 | 0.4984912  | 0.2199692  |
| 17   | I I1  | 3.2645546  | -0.0187839 | -2.1242187 |

**Cartesian coordinates for geometry minimized  $\alpha$ -methylstyrene:**

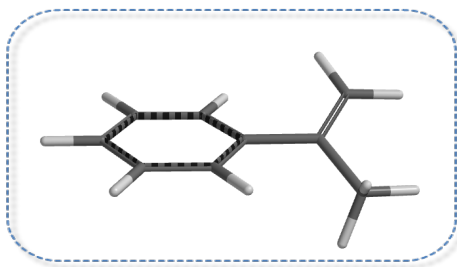

| Atom |       | X          | Y          | Z          |
|------|-------|------------|------------|------------|
| 1    | H H1  | -0.0543720 | 2.2503769  | -0.1497244 |
| 2    | C C1  | -0.4286364 | 1.3767145  | 0.3754165  |
| 3    | C C4  | -1.4766033 | -0.8504688 | 1.6715387  |
| 4    | C C2  | 0.0410623  | 0.1002697  | 0.0136178  |
| 5    | C C6  | -1.3892479 | 1.5375872  | 1.3704535  |
| 6    | C C5  | -1.9175001 | 0.4238483  | 2.0275127  |
| 7    | C C3  | -0.5145509 | -1.0094413 | 0.6737549  |
| 8    | H H6  | -1.7367719 | 2.5357278  | 1.6248454  |
| 9    | H H5  | -2.6712871 | 0.5487679  | 2.8002426  |
| 10   | H H3  | -0.1837947 | -2.0110102 | 0.4172445  |
| 11   | H H4  | -1.8819748 | -1.7273009 | 2.1701069  |
| 12   | C C7  | 1.0786076  | -0.0715433 | -1.0405486 |
| 13   | C C8  | 1.9807647  | 0.8846413  | -1.3109147 |
| 14   | H H8  | 2.0297302  | 1.8131786  | -0.7504886 |
| 15   | C C9  | 1.0973657  | -1.3792354 | -1.8012150 |
| 16   | H H2  | 1.3966913  | -2.2169699 | -1.1577300 |
| 17   | H H10 | 0.1063311  | -1.6244976 | -2.2022647 |
| 18   | H H14 | 2.7179693  | 0.7566693  | -2.0985613 |

19 H H7

1.8062168

-1.3373140

-2.6332862

**Cartesian coordinates for geometry minimized  $\alpha$ -methylstyrene + F cation:**

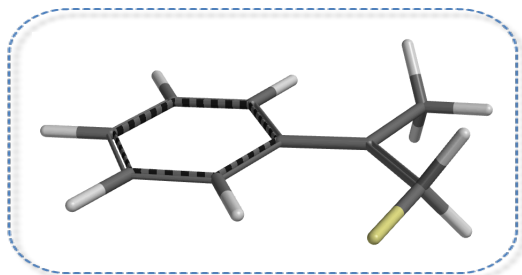

| Atom |     | X          | Y          | Z          |
|------|-----|------------|------------|------------|
| 1 H  | H1  | 0.8268993  | 1.9386516  | 0.7763814  |
| 2 C  | C1  | -0.0748199 | 1.3466181  | 0.7544581  |
| 3 C  | C4  | -2.4366449 | -0.1956646 | 0.6883418  |
| 4 C  | C2  | -0.0841211 | 0.0831349  | 0.0673998  |
| 5 C  | C6  | -1.2177010 | 1.8098166  | 1.3786756  |
| 6 C  | C5  | -2.3929706 | 1.0458066  | 1.3506329  |
| 7 C  | C3  | -1.3092163 | -0.6698768 | 0.0553704  |
| 8 H  | H6  | -1.2039172 | 2.7654028  | 1.8921011  |
| 9 H  | H5  | -3.2856129 | 1.4171075  | 1.8467243  |
| 10 H | H3  | -1.3499687 | -1.6261442 | -0.4517926 |
| 11 H | H4  | -3.3548840 | -0.7733159 | 0.6769108  |
| 12 C | C7  | 1.0490968  | -0.4357215 | -0.5833723 |
| 13 C | C8  | 2.4079159  | 0.1818604  | -0.6473422 |
| 14 H | H8  | 2.6411853  | 0.3464377  | -1.7126624 |
| 15 C | C9  | 1.0223894  | -1.7419414 | -1.3223742 |
| 16 H | H2  | 0.8367010  | -2.5681402 | -0.6235004 |
| 17 H | H10 | 0.2232622  | -1.7632673 | -2.0709981 |
| 18 H | H14 | 3.1285884  | -0.5680494 | -0.2826502 |
| 19 H | H7  | 1.9694056  | -1.9432586 | -1.8291552 |
| 20 F | F1  | 2.6044127  | 1.3505437  | 0.0368513  |

**Cartesian coordinates for geometry minimized  $\alpha$ -methylstyrene + Cl cation:**

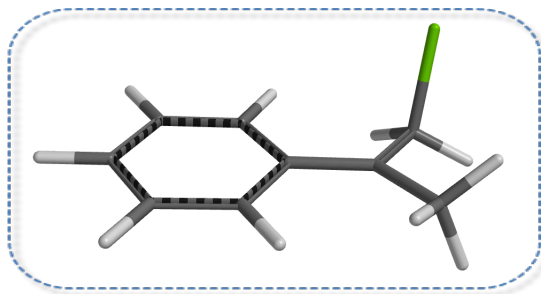

| Atom |        | X          | Y          | Z          |
|------|--------|------------|------------|------------|
| 1    | H H1   | 0.8524194  | 1.8777405  | 0.7165050  |
| 2    | C C1   | -0.0810083 | 1.3318856  | 0.6510305  |
| 3    | C C4   | -2.5061903 | -0.0938857 | 0.5581270  |
| 4    | C C2   | -0.1230751 | 0.0425115  | 0.0205688  |
| 5    | C C6   | -1.2133218 | 1.8736161  | 1.2232405  |
| 6    | C C5   | -2.4269518 | 1.1669125  | 1.1725448  |
| 7    | C C3   | -1.3752485 | -0.6575056 | 0.0027165  |
| 8    | H H6   | -1.1682477 | 2.8411187  | 1.7119204  |
| 9    | H H5   | -3.3174398 | 1.6013467  | 1.6185220  |
| 10   | H H3   | -1.4492442 | -1.6287982 | -0.4703050 |
| 11   | H H4   | -3.4520204 | -0.6242397 | 0.5260742  |
| 12   | C C7   | 1.0279102  | -0.5162342 | -0.5687384 |
| 13   | C C8   | 2.3205086  | 0.2521563  | -0.6608431 |
| 14   | H H8   | 2.1970268  | 1.3308190  | -0.7283068 |
| 15   | C C9   | 1.0981013  | -1.8830376 | -1.1487562 |
| 16   | H H2   | 2.0446183  | -2.3540930 | -0.8564681 |
| 17   | H H10  | 0.2761186  | -2.5452394 | -0.8848084 |
| 18   | H H14  | 2.9264954  | -0.0974754 | -1.4974917 |
| 19   | H H7   | 1.1388190  | -1.7911799 | -2.2469288 |
| 20   | Cl Cl1 | 3.2307301  | -0.1264182 | 0.8613968  |

**Cartesian coordinates for geometry minimized  $\alpha$ -methylstyrene + Br cation:**

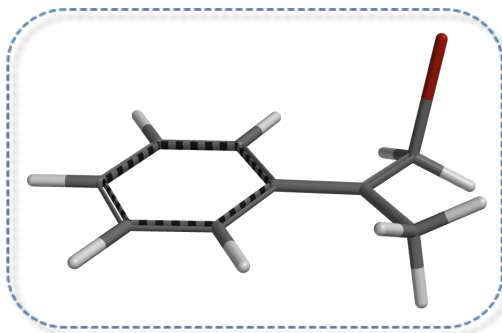

| Atom |      | X         | Y         | Z         |
|------|------|-----------|-----------|-----------|
| 1    | H H1 | 0.8327779 | 1.9119966 | 0.7084753 |

|    |    |     |            |            |            |
|----|----|-----|------------|------------|------------|
| 2  | C  | C1  | -0.0916941 | 1.3530424  | 0.6406643  |
| 3  | C  | C4  | -2.5047018 | -0.1024158 | 0.5433834  |
| 4  | C  | C2  | -0.1135219 | 0.0558758  | 0.0226009  |
| 5  | C  | C6  | -1.2404550 | 1.8914536  | 1.1944123  |
| 6  | C  | C5  | -2.4492275 | 1.1703719  | 1.1432342  |
| 7  | C  | C3  | -1.3585396 | -0.6598175 | 0.0018075  |
| 8  | H  | H6  | -1.2110206 | 2.8648339  | 1.6689701  |
| 9  | H  | H5  | -3.3475157 | 1.5991107  | 1.5750232  |
| 10 | H  | H3  | -1.4135317 | -1.6384902 | -0.4570390 |
| 11 | H  | H4  | -3.4415030 | -0.6454718 | 0.5113394  |
| 12 | C  | C7  | 1.0489179  | -0.5024899 | -0.5660970 |
| 13 | C  | C8  | 2.3221833  | 0.2610903  | -0.6707408 |
| 14 | H  | H8  | 2.2417243  | 1.3418603  | -0.6355645 |
| 15 | C  | C9  | 1.0847678  | -1.8753920 | -1.1566583 |
| 16 | H  | H2  | 2.0994897  | -2.2806491 | -1.1424513 |
| 17 | H  | H10 | 0.4182202  | -2.5863016 | -0.6680319 |
| 18 | H  | H14 | 2.9416736  | -0.0617910 | -1.5049186 |
| 19 | H  | H7  | 0.7861214  | -1.8127022 | -2.2171424 |
| 20 | Br | Br1 | 3.3958347  | -0.2841144 | 1.0087333  |

**Cartesian coordinates for geometry minimized  $\alpha$ -methylstyrene + I cation at the**

**B3LYP/6-31G\*/LANL2DZ level:**

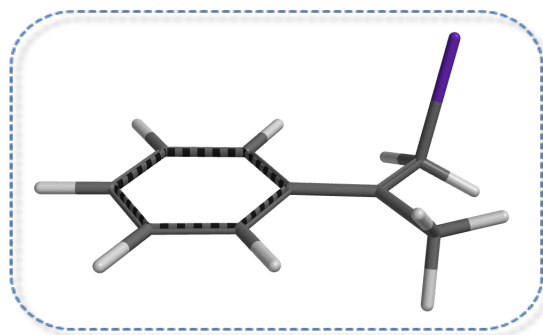

| Atom | X | Y  | Z          |            |            |
|------|---|----|------------|------------|------------|
| 1    | H | H1 | 0.8216134  | 1.9349950  | 0.6952996  |
| 2    | C | C1 | -0.0974624 | 1.3649121  | 0.6285659  |
| 3    | C | C4 | -2.4905437 | -0.1062810 | 0.5325283  |
| 4    | C | C2 | -0.1048925 | 0.0669882  | 0.0276392  |
| 5    | C | C6 | -1.2518304 | 1.8998675  | 1.1662200  |
| 6    | C | C5 | -2.4499482 | 1.1694591  | 1.1156606  |
| 7    | C | C3 | -1.3372975 | -0.6571308 | 0.0060733  |
| 8    | H | H6 | -1.2329263 | 2.8812592  | 1.6283797  |
| 9    | H | H5 | -3.3559224 | 1.5960944  | 1.5368294  |
| 10   | H | H3 | -1.3795844 | -1.6426269 | -0.4422513 |
| 11   | H | H4 | -3.4228396 | -0.6601748 | 0.4999604  |
| 12   | C | C7 | 1.0635820  | -0.4921789 | -0.5559665 |
| 13   | C | C8 | 2.3305740  | 0.2606205  | -0.6583741 |
| 14   | H | H8 | 2.2610386  | 1.3417721  | -0.5902834 |
| 15   | C | C9 | 1.0721913  | -1.8617905 | -1.1622284 |

|    |   |     |           |            |            |
|----|---|-----|-----------|------------|------------|
| 16 | H | H2  | 2.0889431 | -2.2095317 | -1.3515531 |
| 17 | H | H10 | 0.5561395 | -2.6042419 | -0.5487047 |
| 18 | H | H14 | 2.9373174 | -0.0429563 | -1.5102082 |
| 19 | H | H7  | 0.5500666 | -1.8147397 | -2.1304459 |
| 20 | I | I1  | 3.4417814 | -0.4243156 | 1.1128594  |

**Cartesian coordinates for geometry minimized *trans*- $\beta$ -methylstyrene:**

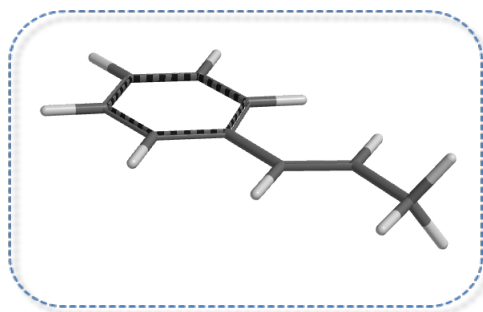

| Atom |   | X   | Y          | Z           |            |
|------|---|-----|------------|-------------|------------|
| 1    | H | H1  | -0.3032617 | 1.4434338   | -1.2951095 |
| 2    | C | C1  | -0.2150847 | 1.3742470   | -0.2145948 |
| 3    | C | C4  | -0.0084324 | 1.2430075   | 2.5620160  |
| 4    | C | C2  | -0.0119607 | 0.1209177   | 0.3934372  |
| 5    | C | C6  | -0.3097799 | 2.5340009   | 0.5486210  |
| 6    | C | C5  | -0.2062783 | 2.4766153   | 1.9417906  |
| 7    | C | C3  | 0.0862075  | 0.0823323   | 1.7954828  |
| 8    | H | H6  | -0.4670086 | 3.4895036   | 0.0544467  |
| 9    | H | H5  | -0.2816820 | 3.3841314   | 2.5347258  |
| 10   | H | H3  | 0.2416392  | -0.8755999  | 2.2871534  |
| 11   | H | H4  | 0.0722434  | 1.1821635   | 3.6443459  |
| 12   | C | C7  | 0.1021490  | -1.1377356  | -0.3598294 |
| 13   | H | H7  | 0.2068386  | -2.0296220  | 0.2601989  |
| 14   | C | C8  | 0.0986798  | -1.3016486  | -1.6911815 |
| 15   | H | H8  | 0.0036050  | -0.4336645  | -2.3438352 |
| 16   | C | C9  | 0.2234347  | -2.6262418  | -2.3843957 |
| 17   | H | H2  | 0.3212531  | -3.4486447  | -1.6676358 |
| 18   | H | H10 | -0.6515615 | -2.82 92254 | -3.0174953 |
| 19   | H | H14 | 1.0989995  | -2.6479705  | -3.0481412 |

**Cartesian coordinates for geometry minimized *trans*- $\beta$ -methylstyrene + F cation:**

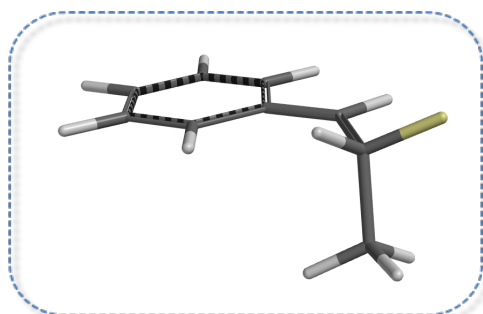

S52



| Atom |       | X          | Y          | Z          |
|------|-------|------------|------------|------------|
| 1    | H H1  | 1.6950242  | 0.2018471  | -0.6603466 |
| 2    | C C1  | 1.1474801  | 0.4843242  | 0.2327420  |
| 3    | C C4  | -0.2977428 | 1.2584934  | 2.5425834  |
| 4    | C C2  | -0.2884213 | 0.4247253  | 0.2449821  |
| 5    | C C6  | 1.8268403  | 0.9112594  | 1.3518993  |
| 6    | C C5  | 1.1065941  | 1.2968524  | 2.5018730  |
| 7    | C C3  | -0.9929841 | 0.8307952  | 1.4300967  |
| 8    | H H6  | 2.9105386  | 0.9618797  | 1.3520224  |
| 9    | H H5  | 1.6532101  | 1.6384720  | 3.3768001  |
| 10   | H H3  | -2.0785636 | 0.7914027  | 1.4371534  |
| 11   | H H4  | -0.8250115 | 1.5645290  | 3.4398285  |
| 12   | C C7  | -1.0321893 | -0.0079843 | -0.8424875 |
| 13   | H H7  | -2.1195756 | 0.0060996  | -0.7554595 |
| 14   | C C8  | -0.5512188 | -0.5607180 | -2.1364050 |
| 15   | H H8  | 0.3502814  | -0.0488542 | -2.4946380 |
| 16   | C C9  | -0.2847499 | -2.0741329 | -1.9983349 |
| 17   | H H2  | 0.5579302  | -2.2719746 | -1.3306097 |
| 18   | H H10 | -1.1722955 | -2.5941163 | -1.6280814 |
| 19   | H H14 | -0.0501390 | -2.4513359 | -2.9980698 |
| 20   | F F1  | -1.5550074 | -0.3615634 | -3.0655486 |

**Cartesian coordinates for geometry minimized *trans*- $\beta$ -methylstyrene + Cl cation:**

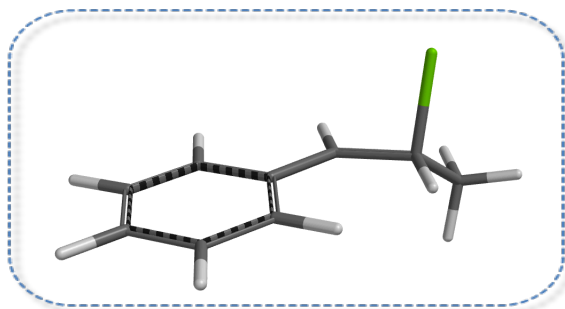

| Atom |      | X          | Y          | Z          |
|------|------|------------|------------|------------|
| 1    | H H1 | 1.8415927  | 0.3792221  | -0.5524955 |
| 2    | C C1 | 1.2525920  | 0.6380542  | 0.3202823  |
| 3    | C C4 | -0.2896535 | 1.3234001  | 2.5927255  |
| 4    | C C2 | -0.1422605 | 0.3073176  | 0.3750987  |
| 5    | C C6 | 1.8458243  | 1.2924901  | 1.3783517  |
| 6    | C C5 | 1.0785012  | 1.6332895  | 2.5100144  |
| 7    | C C3 | -0.8985295 | 0.6715536  | 1.5397491  |
| 8    | H H6 | 2.8997233  | 1.5476129  | 1.3442432  |
| 9    | H H5 | 1.5573512  | 2.1495495  | 3.3377162  |
| 10   | H H3 | -1.9558636 | 0.4253881  | 1.5798343  |
| 11   | H H4 | -0.8582175 | 1.5982875  | 3.4747316  |
| 12   | C C7 | -0.8070644 | -0.3658755 | -0.6457541 |
| 13   | H H7 | -1.8663492 | -0.5760463 | -0.4981623 |
| 14   | C C8 | -0.2765590 | -0.8240323 | -1.9543484 |

|    |    |     |            |            |            |
|----|----|-----|------------|------------|------------|
| 15 | H  | H8  | 0.7972271  | -0.6813895 | -2.0677326 |
| 16 | C  | C9  | -0.7048959 | -2.2291680 | -2.3552876 |
| 17 | H  | H2  | -0.2155746 | -2.9613526 | -1.7026519 |
| 18 | H  | H10 | -1.7888340 | -2.3546941 | -2.2843876 |
| 19 | Cl | Cl1 | -1.0731909 | 0.4521031  | -3.0067585 |
| 20 | H  | H14 | -0.3958189 | -2.4257099 | -3.3851683 |

**Cartesian coordinates for geometry minimized *trans*- $\beta$ -methylstyrene + Br cation:**

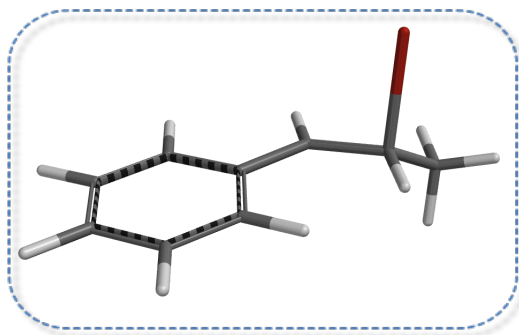

| Atom |    | X   | Y          | Z          |            |
|------|----|-----|------------|------------|------------|
| 1    | H  | H1  | 1.8574729  | 0.3830576  | -0.5330532 |
| 2    | C  | C1  | 1.2617372  | 0.6444875  | 0.3333469  |
| 3    | C  | C4  | -0.2904247 | 1.3409636  | 2.5990273  |
| 4    | C  | C2  | -0.1292304 | 0.2929226  | 0.3901490  |
| 5    | C  | C6  | 1.8468260  | 1.3248348  | 1.3859169  |
| 6    | C  | C5  | 1.0756437  | 1.6724980  | 2.5167296  |
| 7    | C  | C3  | -0.8910606 | 0.6634599  | 1.5511735  |
| 8    | H  | H6  | 2.8957440  | 1.5930012  | 1.3471919  |
| 9    | H  | H5  | 1.5456894  | 2.2057584  | 3.3365620  |
| 10   | H  | H3  | -1.9439914 | 0.4038623  | 1.5960776  |
| 11   | H  | H4  | -0.8644809 | 1.6179014  | 3.4748436  |
| 12   | C  | C7  | -0.7866125 | -0.4129093 | -0.6258795 |
| 13   | H  | H7  | -1.8380584 | -0.6510893 | -0.4669806 |
| 14   | C  | C8  | -0.2356687 | -0.9020513 | -1.9008857 |
| 15   | H  | H8  | 0.8341550  | -0.7594681 | -2.0334701 |
| 16   | C  | C9  | -0.7310299 | -2.2520803 | -2.3839682 |
| 17   | H  | H2  | -0.2724791 | -3.0425599 | -1.7753894 |
| 18   | H  | H10 | -1.8184063 | -2.3407703 | -2.3106930 |
| 19   | H  | H14 | -0.4376409 | -2.4160850 | -3.4232182 |
| 20   | Br | Br1 | -1.0781843 | 0.6342663  | -3.0774805 |

**Cartesian coordinates for geometry minimized *trans*- $\beta$ -methylstyrene + I cation:**

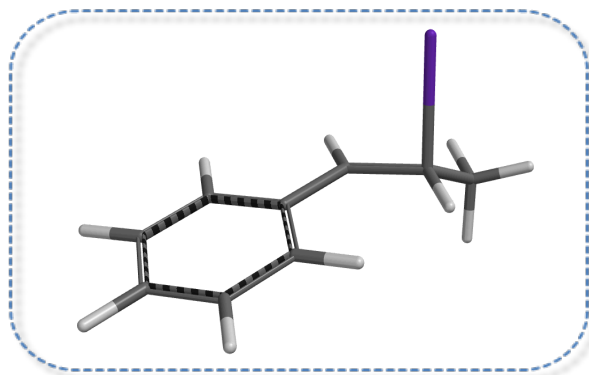

| Atom |       | X          | Y          | Z          |
|------|-------|------------|------------|------------|
| 1    | H H1  | 1.8494486  | 0.4237718  | -0.5496064 |
| 2    | C C1  | 1.2515656  | 0.6678248  | 0.3201486  |
| 3    | C C4  | -0.2852244 | 1.3201876  | 2.5871639  |
| 4    | C C2  | -0.1321358 | 0.3299062  | 0.3668280  |
| 5    | C C6  | 1.8402660  | 1.3137967  | 1.3850405  |
| 6    | C C5  | 1.0759639  | 1.6379051  | 2.5175545  |
| 7    | C C3  | -0.8879579 | 0.6788587  | 1.5236835  |
| 8    | H H6  | 2.8924886  | 1.5702541  | 1.3530702  |
| 9    | H H5  | 1.5503198  | 2.1431802  | 3.3521744  |
| 10   | H H3  | -1.9428120 | 0.4287196  | 1.5638640  |
| 11   | H H4  | -0.8598802 | 1.5772193  | 3.4689331  |
| 12   | C C7  | -0.7883929 | -0.3803678 | -0.6546760 |
| 13   | H H7  | -1.8324835 | -0.6314673 | -0.4804312 |
| 14   | C C8  | -0.2316178 | -0.9099972 | -1.8949633 |
| 15   | H H8  | 0.8369943  | -0.7660635 | -2.0198083 |
| 16   | C C9  | -0.7154934 | -2.2725801 | -2.3491641 |
| 17   | H H2  | -0.2478077 | -3.0362309 | -1.7185189 |
| 18   | H H10 | -1.7985210 | -2.3752239 | -2.2697020 |
| 19   | H H14 | -0.4223518 | -2.4638129 | -3.3810689 |
| 20   | I I1  | -1.1523684 | 0.7441194  | -3.1205218 |

**Cartesian coordinates for geometry minimized *cis*- $\beta$ -methylstyrene:**

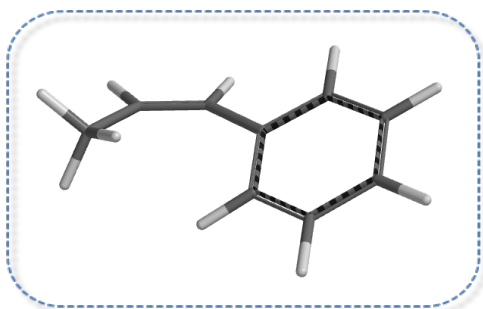

| Atom |  | X | Y | Z |
|------|--|---|---|---|
|------|--|---|---|---|

|    |   |     |            |            |            |
|----|---|-----|------------|------------|------------|
| 1  | H | H1  | -0.9234456 | 0.9465027  | -1.1015877 |
| 2  | C | C1  | -0.5814928 | 0.8807578  | -0.0740923 |
| 3  | C | C4  | 0.1704031  | 0.7208959  | 2.6057955  |
| 4  | C | C2  | -0.1651186 | -0.3597750 | 0.4426459  |
| 5  | C | C6  | -0.6050526 | 2.0207735  | 0.7290371  |
| 6  | C | C5  | -0.2230467 | 1.9491230  | 2.0696045  |
| 7  | C | C3  | 0.1905473  | -0.4172493 | 1.8033731  |
| 8  | H | H6  | -0.9354075 | 2.9668141  | 0.3075209  |
| 9  | H | H5  | -0.2440752 | 2.8384877  | 2.6937307  |
| 10 | H | H3  | 0.4958038  | -1.3709947 | 2.2281328  |
| 11 | H | H4  | 0.4578425  | 0.6490724  | 3.6516742  |
| 12 | C | C7  | -0.1259336 | -1.6009607 | -0.3527417 |
| 13 | H | H7  | -0.3228481 | -2.5049577 | 0.2243823  |
| 14 | C | C8  | 0.1518614  | -1.7686650 | -1.6572552 |
| 15 | H | H8  | 0.1111787  | -2.7914341 | -2.0322993 |
| 16 | C | C9  | 0.5563012  | -0.7370371 | -2.6731029 |
| 17 | H | H2  | 0.9129031  | 0.1874253  | -2.2107370 |
| 18 | H | H10 | 1.3567311  | -1.1305768 | -3.3118026 |
| 19 | H | H14 | -0.2771514 | -0.4782021 | -3.3422782 |

**Cartesian coordinates for geometry minimized *cis*- $\beta$ -methylstyrene + F cation:**

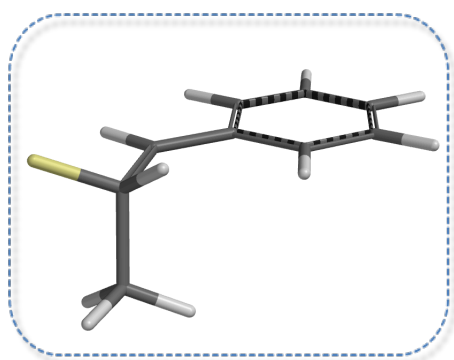

| Atom | X | Y  | Z          |            |            |
|------|---|----|------------|------------|------------|
| 1    | H | H1 | 1.1119258  | 1.1495487  | -0.8902513 |
| 2    | C | C1 | 0.6798624  | 1.0649594  | 0.1012788  |
| 3    | C | C4 | -0.4077372 | 0.8127077  | 2.7050387  |
| 4    | C | C2 | 0.1023642  | -0.1792678 | 0.5297595  |
| 5    | C | C6 | 0.6954936  | 2.1448640  | 0.9555887  |
| 6    | C | C5 | 0.1540619  | 2.0187079  | 2.2521613  |
| 7    | C | C3 | -0.4347183 | -0.2773156 | 1.8595014  |
| 8    | H | H6 | 1.1295815  | 3.0884175  | 0.6421690  |
| 9    | H | H5 | 0.1787208  | 2.8758949  | 2.9197088  |
| 10   | H | H3 | -0.8642102 | -1.2203051 | 2.1858766  |
| 11   | H | H4 | -0.8128270 | 0.7434694  | 3.7089588  |
| 12   | C | C7 | 0.0403306  | -1.2998401 | -0.2845878 |
| 13   | H | H7 | -0.3913257 | -2.2105820 | 0.1331818  |
| 14   | C | C8 | 0.4378418  | -1.4373396 | -1.7109923 |
| 15   | H | H8 | 1.3519814  | -0.8768709 | -1.9421268 |
| 16   | C | C9 | -0.7141760 | -0.9792857 | -2.6296449 |
| 17   | H | H2 | -1.6356511 | -1.5198861 | -2.3977861 |

|    |   |     |            |            |            |
|----|---|-----|------------|------------|------------|
| 18 | H | H10 | -0.8915606 | 0.0960692  | -2.5441245 |
| 19 | H | H14 | -0.4188930 | -1.2163636 | -3.6559917 |
| 20 | F | F1  | 0.6889351  | -2.7775821 | -1.9377179 |

**Cartesian coordinates for geometry minimized *cis*- $\beta$ -methylstyrene + Cl cation:**

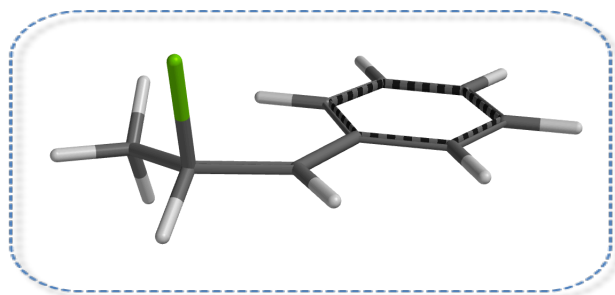

| Atom |    | X   | Y          | Z          |            |
|------|----|-----|------------|------------|------------|
| 1    | H  | H1  | -0.0963462 | 1.2459008  | -1.0864510 |
| 2    | C  | C1  | -0.0647157 | 1.1065062  | -0.0152871 |
| 3    | C  | C4  | 0.0356081  | 0.7524627  | 2.7927693  |
| 4    | C  | C2  | 0.0453575  | -0.2127516 | 0.5403547  |
| 5    | C  | C6  | -0.1271382 | 2.2019182  | 0.8192681  |
| 6    | C  | C5  | -0.0778132 | 2.0280931  | 2.2163611  |
| 7    | C  | C3  | 0.0943225  | -0.3541759 | 1.9711455  |
| 8    | H  | H6  | -0.2119710 | 3.2004379  | 0.4035825  |
| 9    | H  | H5  | -0.1272708 | 2.9013878  | 2.8611325  |
| 10   | H  | H3  | 0.1757665  | -1.3497128 | 2.3980117  |
| 11   | H  | H4  | 0.0731585  | 0.6416445  | 3.8712205  |
| 12   | C  | C7  | 0.1210474  | -1.3932821 | -0.1967684 |
| 13   | H  | H7  | 0.2200235  | -2.3019809 | 0.3954807  |
| 14   | C  | C8  | 0.0444923  | -1.6943180 | -1.6568612 |
| 15   | H  | H8  | 0.7119536  | -2.5366193 | -1.8602527 |
| 16   | C  | C9  | 0.1760078  | -0.6378408 | -2.7380225 |
| 17   | H  | H2  | -0.6311985 | 0.0971960  | -2.7078397 |
| 18   | H  | H10 | 1.1451344  | -0.1327757 | -2.6531436 |
| 19   | H  | H14 | 0.1401085  | -1.1278607 | -3.7143236 |
| 20   | Cl | Cl1 | -1.6465270 | -2.4342294 | -1.6403767 |

**Cartesian coordinates for geometry minimized *cis*- $\beta$ -methylstyrene + Br cation:**

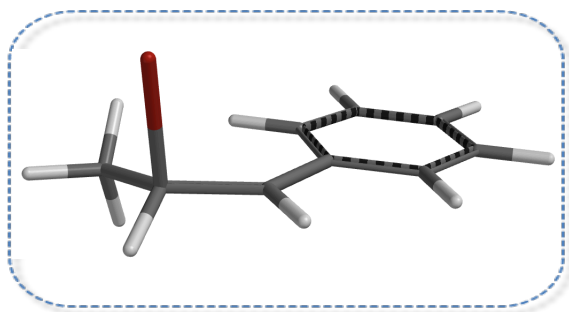

| Atom |        | X          | Y          | Z          |
|------|--------|------------|------------|------------|
| 1    | H H1   | -0.1242977 | 1.2525088  | -1.0822717 |
| 2    | C C1   | -0.0805535 | 1.1087581  | -0.0132837 |
| 3    | C C4   | 0.0438337  | 0.7574816  | 2.7966616  |
| 4    | C C2   | 0.0456347  | -0.2117892 | 0.5387691  |
| 5    | C C6   | -0.1436356 | 2.2077448  | 0.8251486  |
| 6    | C C5   | -0.0823670 | 2.0375338  | 2.2248518  |
| 7    | C C3   | 0.1049413  | -0.3519290 | 1.9714021  |
| 8    | H H6   | -0.2385979 | 3.2035717  | 0.4091723  |
| 9    | H H5   | -0.1326469 | 2.9086491  | 2.8698093  |
| 10   | H H3   | 0.1967266  | -1.3455523 | 2.3983420  |
| 11   | H H4   | 0.0897453  | 0.6443622  | 3.8729635  |
| 12   | C C7   | 0.1359628  | -1.3976990 | -0.2044704 |
| 13   | H H7   | 0.2593054  | -2.3034865 | 0.3879168  |
| 14   | C C8   | 0.0964777  | -1.6778479 | -1.6551731 |
| 15   | H H8   | 0.6841846  | -2.5711030 | -1.8747749 |
| 16   | C C9   | 0.2170468  | -0.6317856 | -2.7410982 |
| 17   | H H2   | -0.5843437 | 0.1094068  | -2.7182471 |
| 18   | H H10  | 1.1862720  | -0.1222955 | -2.6580732 |
| 19   | H H14  | 0.1860556  | -1.1185417 | -3.7187228 |
| 20   | Br Br1 | -1.8597441 | -2.4979874 | -1.6289216 |

**Cartesian coordinates for geometry minimized *cis* - $\beta$ -methylstyrene + I cation at the B3LYP/6-31G\*/LANL2DZ level:**

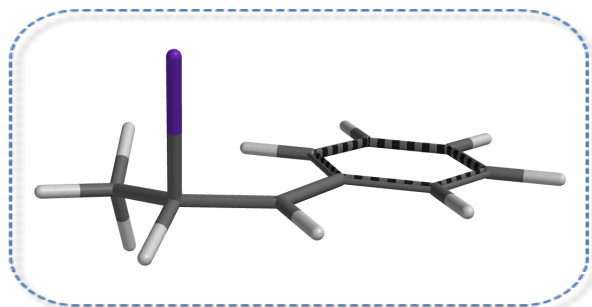

| Atom |       | X          | Y          | Z          |
|------|-------|------------|------------|------------|
| 1    | H H1  | -1.2570456 | -0.8310066 | -0.7161051 |
| 2    | C C1  | -0.9804834 | -0.4643835 | 0.2609092  |
| 3    | C C4  | -0.3075297 | 0.4980664  | 2.8219562  |
| 4    | C C2  | 0.2425273  | 0.2419302  | 0.4558242  |
| 5    | C C6  | -1.8346219 | -0.6719027 | 1.3230695  |
| 6    | C C5  | -1.5009766 | -0.1977252 | 2.6008649  |
| 7    | C C3  | 0.5528466  | 0.7174189  | 1.7662658  |
| 8    | H H6  | -2.7678775 | -1.2016890 | 1.1725929  |
| 9    | H H5  | -2.1809933 | -0.3714524 | 3.4279800  |
| 10   | H H3  | 1.4820386  | 1.2538936  | 1.9274982  |
| 11   | H H4  | -0.0619948 | 0.8601786  | 3.8130887  |
| 12   | C C7  | 1.1749812  | 0.5523158  | -0.5538332 |
| 13   | H H7  | 1.9956325  | 1.1862742  | -0.2286387 |
| 14   | C C8  | 1.2384836  | 0.2443922  | -1.9843568 |
| 15   | H H8  | 1.7953812  | 1.0219839  | -2.5039000 |
| 16   | C C9  | 0.1006584  | -0.2994382 | -2.8159743 |
| 17   | H H2  | -0.2671061 | -1.2667538 | -2.4774542 |
| 18   | H H10 | -0.7254075 | 0.4203349  | -2.8108847 |
| 19   | H H14 | 0.4280237  | -0.4139104 | -3.8490132 |
| 20   | I I1  | 2.8734633  | -1.2785270 | -1.6298892 |

**Cartesian coordinates for geometry minimized 2,4,6-trimethyl pyridine (1a):**

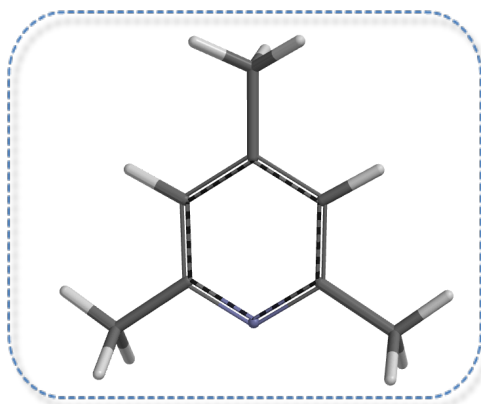

| Atom     | X          | Y          | Z          |
|----------|------------|------------|------------|
| 1 C C1   | -1.4244548 | -0.0123527 | 0.0000000  |
| 2 N N1   | 1.3882477  | 0.0062446  | 0.0000000  |
| 3 C C2   | -0.6963245 | -0.0108158 | 1.1929154  |
| 4 C C6   | -0.6963245 | -0.0108158 | -1.1929154 |
| 5 C C5   | 0.7018459  | 0.0001699  | -1.1535693 |
| 6 C C3   | 0.7018459  | 0.0001699  | 1.1535693  |
| 7 H H6   | -1.2126451 | -0.0200574 | -2.1497555 |
| 8 H H3   | -1.2126451 | -0.0200574 | 2.1497555  |
| 9 C C4   | 1.5256542  | 0.0027114  | 2.4186636  |
| 10 H H2  | 2.1824902  | -0.8742538 | 2.4497664  |
| 11 H H4  | 0.8959480  | -0.0014085 | 3.3136334  |
| 12 H H7  | 2.1733436  | 0.8863785  | 2.4514046  |
| 13 C C7  | 1.5256542  | 0.0027114  | -2.4186636 |
| 14 H H1  | 2.1824902  | -0.8742538 | -2.4497664 |
| 15 H H8  | 2.1733436  | 0.8863785  | -2.4514046 |
| 16 H H9  | 0.8959480  | -0.0014085 | -3.3136334 |
| 17 C C8  | -2.9336996 | 0.0110175  | 0.0000000  |
| 18 H H5  | -3.3427524 | -0.4830072 | 0.8876019  |
| 19 H H10 | -3.3427524 | -0.4830072 | -0.8876019 |
| 20 H H11 | -3.3065445 | 1.0438393  | 0.0000000  |

**Cartesian coordinates for geometry minimized 2,4,6-trimethyl pyridine (1a) at the B3LYP/6-31G\*/SM8 (acetone) level:**

| Atom     | X          | Y          | Z          |
|----------|------------|------------|------------|
| 1 C C1   | -1.4232569 | -0.0123923 | -0.0000003 |
| 2 N N1   | 1.3924566  | 0.0055747  | 0.0000006  |
| 3 C C2   | -0.6932652 | -0.0105984 | 1.1928980  |
| 4 C C6   | -0.6932644 | -0.0105946 | -1.1928982 |
| 5 C C5   | 0.7035880  | -0.0000109 | -1.1576148 |
| 6 C C3   | 0.7035875  | -0.0000113 | 1.1576158  |
| 7 H H6   | -1.2090640 | -0.0188997 | -2.1492029 |
| 8 H H3   | -1.2090681 | -0.0189057 | 2.1492009  |
| 9 C C4   | 1.5214692  | 0.0026874  | 2.4232737  |
| 10 H H2  | 2.1790071  | -0.8736897 | 2.4638131  |
| 11 H H4  | 0.8876639  | -0.0014102 | 3.3143907  |
| 12 H H7  | 2.1697001  | 0.8859043  | 2.4653907  |
| 13 C C7  | 1.5214683  | 0.0026782  | -2.4232731 |
| 14 H H1  | 2.1789699  | -0.8737259 | -2.4638298 |
| 15 H H8  | 2.1697355  | 0.8858690  | -2.4653754 |
| 16 H H9  | 0.8876623  | -0.0013784 | -3.3143898 |
| 17 C C8  | -2.9293029 | 0.0102767  | -0.0000001 |
| 18 H H5  | -3.3390691 | -0.4830526 | 0.8870475  |
| 19 H H10 | -3.3390684 | -0.4830271 | -0.8870619 |
| 20 H H11 | -3.3012808 | 1.0428893  | 0.0000153  |



## Cartesian coordinates for geometry minimized 2,4,6-trimethyl pyridine + F cation

**(1a-F):**

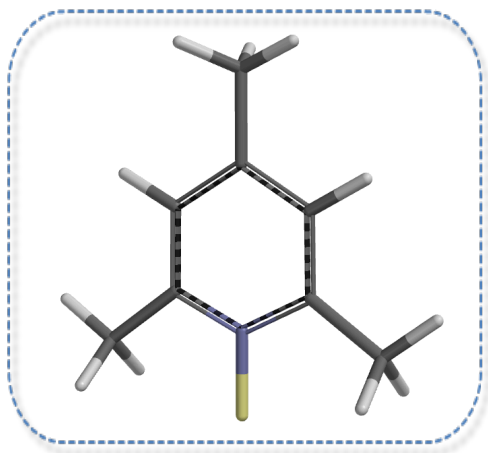

|    | Atom  | X          | Y          | Z          |
|----|-------|------------|------------|------------|
| 1  | C C1  | -0.4605306 | -0.0037852 | -1.3936822 |
| 2  | N N1  | 0.3959968  | -0.0043049 | 1.1699148  |
| 3  | C C2  | -0.2329322 | -1.2069616 | -0.7084838 |
| 4  | C C6  | -0.2268752 | 1.2011880  | -0.7085148 |
| 5  | C C5  | 0.2111258  | 1.2174310  | 0.6072769  |
| 6  | C C3  | 0.2061741  | -1.2237407 | 0.6092894  |
| 7  | H H2  | -0.3969880 | -2.1606090 | -1.1982709 |
| 8  | H H6  | -0.3866077 | 2.1554514  | -1.1992386 |
| 9  | C C4  | 0.4775200  | -2.4441823 | 1.4309164  |
| 10 | C C10 | 0.4873300  | 2.4365565  | 1.4296020  |
| 11 | C C14 | -0.9531236 | 0.0049386  | -2.8123576 |
| 12 | H H7  | -0.3643753 | 0.6938957  | -3.4271886 |
| 13 | H H22 | -1.9943060 | 0.3504879  | -2.8471818 |
| 14 | H H23 | -0.9121060 | -0.9891229 | -3.2627882 |
| 15 | H H24 | 0.2625566  | -3.3362828 | 0.8412759  |
| 16 | H H25 | 1.5244478  | -2.4751041 | 1.7519449  |
| 17 | H H26 | -0.1455202 | -2.4548581 | 2.3316222  |
| 18 | H H27 | 1.5339301  | 2.4630265  | 1.7519018  |
| 19 | H H28 | -0.1370456 | 2.4505478  | 2.3293070  |
| 20 | H H29 | 0.2771937  | 3.3295574  | 0.8395081  |
| 21 | F F1  | 0.8341353  | -0.0041291 | 2.4651471  |

## Cartesian coordinates for geometry minimized 2,4,6-trimethyl pyridine + Cl cation

**(1a-Cl):**

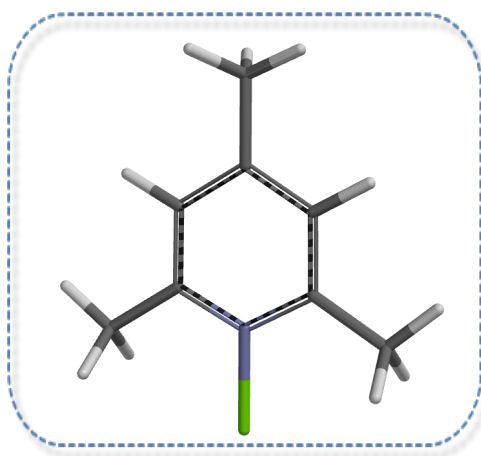

| Atom     | X          | Y          | Z          |
|----------|------------|------------|------------|
| 1 C C1   | -0.4587553 | -0.0039247 | -1.3860869 |
| 2 N N1   | 0.4160348  | -0.0044046 | 1.2281940  |
| 3 C C2   | -0.2278196 | -1.1992827 | -0.6959907 |
| 4 C C6   | -0.2214938 | 1.1932565  | -0.6962449 |
| 5 C C5   | 0.2166656  | 1.2116364  | 0.6184780  |
| 6 C C3   | 0.2118328  | -1.2180391 | 0.6205759  |
| 7 H H2   | -0.3910220 | -2.1538065 | -1.1843174 |
| 8 H H6   | -0.3799483 | 2.1484190  | -1.1855733 |
| 9 Cl Cl1 | 0.9620075  | -0.0043125 | 2.8758940  |
| 10 C C4  | 0.4605612  | -2.4885560 | 1.3717030  |
| 11 C C10 | 0.4704970  | 2.4810328  | 1.3702715  |
| 12 C C14 | -0.9549018 | 0.0046660  | -2.8024847 |
| 13 H H7  | -0.3678287 | 0.6934960  | -3.4192827 |
| 14 H H22 | -1.9957340 | 0.3518944  | -2.8340770 |
| 15 H H23 | -0.9166225 | -0.9895156 | -3.2530373 |
| 16 H H24 | 0.2497825  | -3.3405299 | 0.7235766  |
| 17 H H25 | 1.5014445  | -2.5568983 | 1.7067503  |
| 18 H H26 | -0.1795422 | -2.5589923 | 2.2580331  |
| 19 H H27 | 1.5119483  | 2.5464022  | 1.7039618  |
| 20 H H28 | -0.1685648 | 2.5536607  | 2.2571103  |
| 21 H H29 | 0.2614589  | 3.3337983  | 0.7225462  |

### Cartesian coordinates for geometry minimized 2,4,6-trimethyl pyridine + Cl cation

(1a-Cl) at the B3LYP/6-31G\*/SM8 (acetone) level:

| Atom     | X          | Y          | Z          |
|----------|------------|------------|------------|
| 1 C C1   | -0.4559613 | -0.0048480 | -1.3816389 |
| 2 N N1   | 0.4159178  | -0.0046638 | 1.2261837  |
| 3 C C2   | -0.2255991 | -1.2002788 | -0.6946727 |
| 4 C C6   | -0.2207756 | 1.1927408  | -0.6948392 |
| 5 C C5   | 0.2164722  | 1.2125342  | 0.6191172  |
| 6 C C3   | 0.2128388  | -1.2195999 | 0.6214042  |
| 7 H H2   | -0.3878407 | -2.1548634 | -1.1818630 |
| 8 H H6   | -0.3803688 | 2.1472686  | -1.1837641 |
| 9 Cl C11 | 0.9646636  | -0.0041663 | 2.8807573  |
| 10 C C4  | 0.4601370  | -2.4886766 | 1.3693577  |
| 11 C C10 | 0.4678066  | 2.4808341  | 1.3675074  |
| 12 C C14 | -0.9523920 | 0.0057120  | -2.7959546 |
| 13 H H7  | -0.3598737 | 0.6865478  | -3.4158629 |
| 14 H H22 | -1.9890795 | 0.3634138  | -2.8301598 |
| 15 H H23 | -0.9251701 | -0.9887968 | -3.2463149 |
| 16 H H24 | 0.2438912  | -3.3368015 | 0.7188772  |
| 17 H H25 | 1.5015671  | -2.5660677 | 1.6991569  |
| 18 H H26 | -0.1787264 | -2.5644022 | 2.2555277  |
| 19 H H27 | 1.5095090  | 2.5557429  | 1.6968617  |
| 20 H H28 | -0.1708472 | 2.5589875  | 2.2535668  |
| 21 H H29 | 0.2538312  | 3.3293832  | 0.7167522  |

### Cartesian coordinates for geometry minimized 2,4,6-trimethyl pyridine + Br cation

(1a-Br):

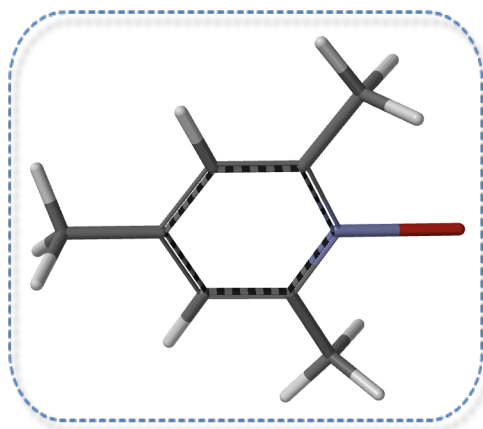

| Atom   | X          | Y          | Z          |
|--------|------------|------------|------------|
| 1 C C1 | -0.5085398 | -0.0016614 | -1.3774365 |
| 2 N N1 | 0.4439891  | -0.0027266 | 1.2220452  |

|    |    |     |            |            |            |
|----|----|-----|------------|------------|------------|
| 3  | C  | C2  | -0.2527254 | -1.2016674 | -0.6953799 |
| 4  | C  | C6  | -0.2573508 | 1.1989604  | -0.6919287 |
| 5  | C  | C5  | 0.2215547  | 1.2155932  | 0.6154715  |
| 6  | C  | C3  | 0.2264933  | -1.2193070 | 0.6131688  |
| 7  | H  | H2  | -0.4290950 | -2.1534307 | -1.1806020 |
| 8  | H  | H6  | -0.4376370 | 2.1513820  | -1.1749086 |
| 9  | C  | C4  | 0.4950209  | -2.5000639 | 1.3417112  |
| 10 | C  | C10 | 0.4859306  | 2.4951871  | 1.3478531  |
| 11 | Br | Br1 | 1.0961805  | -0.0033691 | 3.0796683  |
| 12 | C  | C14 | -1.0170364 | 0.0034186  | -2.7910386 |
| 13 | H  | H7  | -0.1929687 | 0.1941550  | -3.4918370 |
| 14 | H  | H22 | -1.7590922 | 0.7930121  | -2.9439227 |
| 15 | H  | H23 | -1.4667739 | -0.9543223 | -3.0624677 |
| 16 | H  | H24 | 1.5341897  | 2.5731946  | 1.6573596  |
| 17 | H  | H25 | -0.1330370 | 2.5792812  | 2.2481237  |
| 18 | H  | H26 | 0.2594518  | 3.3428033  | 0.6997847  |
| 19 | H  | H27 | 0.2716547  | -3.3466338 | 0.6912466  |
| 20 | H  | H28 | 1.5434864  | -2.5752096 | 1.6513179  |
| 21 | H  | H29 | -0.1236955 | -2.5885957 | 2.2417710  |

**Cartesian coordinates for geometry minimized 2,4,6-trimethyl pyridine + I cation**

**(1a- I) at the B3LYP/6-31G\*/LANL2DZ level:**

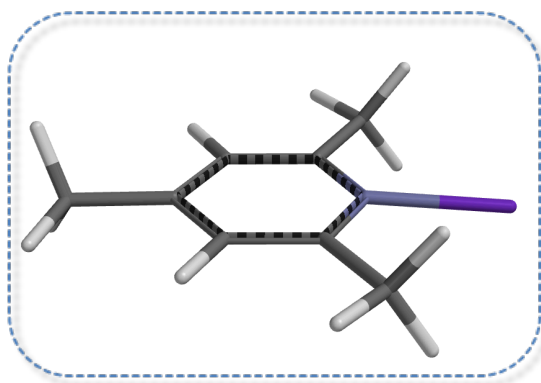

| Atom | X | Y   | Z          |            |            |
|------|---|-----|------------|------------|------------|
| 1    | C | C1  | -0.4641932 | 0.0083029  | -1.3901767 |
| 2    | N | N1  | 0.4078970  | 0.0024977  | 1.2422231  |
| 3    | C | C2  | -0.2246739 | -1.1848352 | -0.7031872 |
| 4    | C | C6  | -0.2124777 | 1.1958822  | -0.7038429 |
| 5    | C | C5  | 0.2216503  | 1.2058075  | 0.6138388  |
| 6    | C | C3  | 0.2081600  | -1.2008960 | 0.6119717  |
| 7    | H | H2  | -0.3857530 | -2.1375969 | -1.1933822 |
| 8    | H | H6  | -0.3631758 | 2.1506835  | -1.1924452 |
| 9    | C | C4  | 0.4544323  | -2.4921086 | 1.3277390  |
| 10   | C | C10 | 0.4802848  | 2.4947039  | 1.3288930  |
| 11   | I | I1  | 0.9231693  | -0.0014757 | 3.3228900  |
| 12   | C | C14 | -0.9657914 | 0.0000599  | -2.8025454 |
| 13   | H | H7  | -0.2053585 | -0.4068029 | -3.4761880 |

|    |   |     |            |            |            |
|----|---|-----|------------|------------|------------|
| 14 | H | H22 | -1.2260774 | 0.9993983  | -3.1498878 |
| 15 | H | H23 | -1.8481538 | -0.6384571 | -2.8955120 |
| 16 | H | H24 | 1.5141831  | 2.5577318  | 1.6788273  |
| 17 | H | H25 | -0.1729783 | 2.6152442  | 2.1969467  |
| 18 | H | H26 | 0.3028989  | 3.3319922  | 0.6561377  |
| 19 | H | H27 | 0.2654658  | -3.3275621 | 0.6557852  |
| 20 | H | H28 | 1.4884988  | -2.5669382 | 1.6746246  |
| 21 | H | H29 | -0.1980074 | -2.6056316 | 2.1972902  |

**Cartesian coordinates for geometry minimized 2,6-di-*tert*-butyl pyridine (1b):**

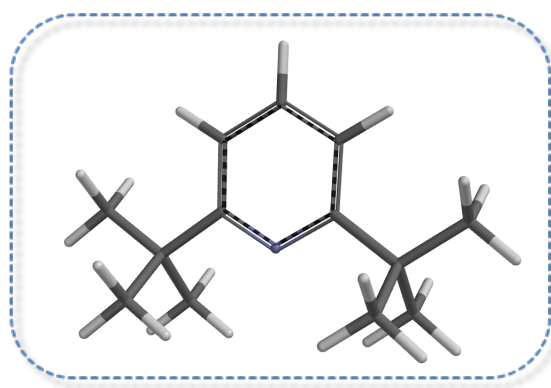

| Atom | X | Y   | Z          |            |            |
|------|---|-----|------------|------------|------------|
| 1    | C | C1  | -0.7108567 | 0.0218167  | -2.5990573 |
| 2    | N | N1  | 0.0215260  | -0.0006476 | 0.0675877  |
| 3    | C | C2  | -0.5264361 | -1.1870869 | -1.9336875 |
| 4    | C | C6  | -0.5270256 | 1.2193147  | -1.9131182 |
| 5    | C | C5  | -0.1565644 | 1.1709519  | -0.5626801 |
| 6    | C | C3  | -0.1561866 | -1.1613723 | -0.5824331 |
| 7    | H | H2  | -0.6699041 | -2.1246244 | -2.4577590 |
| 8    | H | H6  | -0.6712654 | 2.1654781  | -2.4213232 |
| 9    | H | H4  | -0.9980562 | 0.0308068  | -3.6478441 |
| 10   | C | C4  | 0.0749097  | -2.4292451 | 0.2564900  |
| 11   | C | C7  | 1.5395838  | -2.4319098 | 0.7507208  |
| 12   | H | H1  | 1.7605028  | -1.5156513 | 1.3050322  |
| 13   | H | H8  | 2.2402534  | -2.4997350 | -0.0904048 |
| 14   | H | H9  | 1.7171826  | -3.2910537 | 1.4092421  |
| 15   | C | C8  | -0.1854748 | -3.7185630 | -0.5422495 |
| 16   | H | H3  | 0.4887314  | -3.8089299 | -1.4020010 |
| 17   | H | H10 | -1.2179519 | -3.7722915 | -0.9073025 |
| 18   | H | H11 | -0.0171941 | -4.5901615 | 0.1002301  |
| 19   | C | C9  | -0.8725708 | -2.3946492 | 1.4767446  |
| 20   | H | H7  | -0.7137117 | -1.4859947 | 2.0633833  |
| 21   | H | H12 | -0.6929792 | -3.2637641 | 2.1212907  |
| 22   | H | H13 | -1.9231185 | -2.4174559 | 1.1624936  |
| 23   | C | C10 | 0.0748656  | 2.4241997  | 0.2977723  |
| 24   | C | C11 | -0.8684097 | 2.3669328  | 1.5203620  |
| 25   | H | H14 | -0.7060186 | 1.4492478  | 2.0917641  |
| 26   | H | H16 | -1.9200240 | 2.3928464  | 1.2099448  |
| 27   | H | H17 | -0.6881079 | 3.2260124  | 2.1778977  |

|    |   |     |            |           |            |
|----|---|-----|------------|-----------|------------|
| 28 | C | C12 | 1.5411406  | 2.4208612 | 0.7870249  |
| 29 | H | H5  | 1.7654742  | 1.4955139 | 1.3246165  |
| 30 | H | H18 | 1.7195087  | 3.2687133 | 1.4598032  |
| 31 | H | H19 | 2.2389516  | 2.5044158 | -0.0550359 |
| 32 | C | C13 | -0.1913294 | 3.7272923 | -0.4762684 |
| 33 | H | H15 | 0.4805734  | 3.8374473 | -1.3355948 |
| 34 | H | H20 | -0.0252224 | 4.5871480 | 0.1824438  |
| 35 | H | H21 | -1.2247959 | 3.7841369 | -0.8380848 |

**Cartesian coordinates for geometry minimized 2,6-di-*tert*-butyl pyridine (1b) at the**

**B3LYP/6-31G\*/SM8 (acetone) level:**

|    | Atom  | X          | Y          | Z          |
|----|-------|------------|------------|------------|
| 1  | C C1  | -0.6976228 | 0.0218416  | -2.5978550 |
| 2  | N N1  | 0.0232949  | -0.0007424 | 0.0730001  |
| 3  | C C2  | -0.5164122 | -1.1870101 | -1.9316710 |
| 4  | C C6  | -0.5170915 | 1.2192235  | -1.9109971 |
| 5  | C C5  | -0.1528030 | 1.1733293  | -0.5596962 |
| 6  | C C3  | -0.1523930 | -1.1638580 | -0.5795889 |
| 7  | H H2  | -0.6584949 | -2.1235922 | -2.4568693 |
| 8  | H H6  | -0.6600756 | 2.1644802  | -2.4202576 |
| 9  | H H4  | -0.9805322 | 0.0308844  | -3.6467636 |
| 10 | C C4  | 0.0732644  | -2.4368880 | 0.2555882  |
| 11 | C C7  | 1.5379310  | -2.4567669 | 0.7473401  |
| 12 | H H1  | 1.7757813  | -1.5506580 | 1.3131499  |
| 13 | H H8  | 2.2408825  | -2.5243401 | -0.0920335 |
| 14 | H H9  | 1.7115489  | -3.3232595 | 1.3968737  |
| 15 | C C8  | -0.1972043 | -3.7203930 | -0.5478623 |
| 16 | H H3  | 0.4752553  | -3.8167970 | -1.4078288 |
| 17 | H H10 | -1.2298864 | -3.7689506 | -0.9120559 |
| 18 | H H11 | -0.0353894 | -4.5969813 | 0.0895222  |
| 19 | C C9  | -0.8692403 | -2.4075368 | 1.4789386  |
| 20 | H H7  | -0.7077716 | -1.5079568 | 2.0802919  |
| 21 | H H12 | -0.6952668 | -3.2830763 | 2.1158943  |
| 22 | H H13 | -1.9227674 | -2.4225039 | 1.1736151  |
| 23 | C C10 | 0.0731915  | 2.4317642  | 0.2971174  |
| 24 | C C11 | -0.8652168 | 2.3799751  | 1.5227846  |
| 25 | H H14 | -0.6998838 | 1.4716424  | 2.1097797  |
| 26 | H H16 | -1.9197355 | 2.3972385  | 1.2210483  |
| 27 | H H17 | -0.6910147 | 3.2460906  | 2.1722965  |
| 28 | C C12 | 1.5393723  | 2.4456210  | 0.7843487  |
| 29 | H H5  | 1.7804060  | 1.5304629  | 1.3340306  |
| 30 | H H18 | 1.7137353  | 3.3012601  | 1.4479078  |
| 31 | H H19 | 2.2395967  | 2.5283922  | -0.0559094 |
| 32 | C C13 | -0.2029202 | 3.7290858  | -0.4818121 |
| 33 | H H15 | 0.4671020  | 3.8450745  | -1.3413420 |
| 34 | H H20 | -0.0430390 | 4.5940425  | 0.1717877  |
| 35 | H H21 | -1.2366006 | 3.7809022  | -0.8427725 |

## Cartesian coordinates for geometry minimized 2,6-di-*tert*-butyl pyridine + F cation

**(1b-F):**

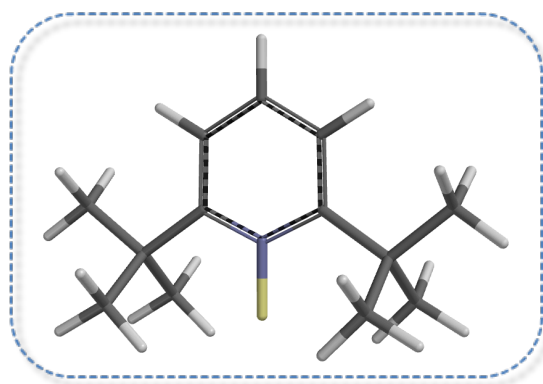

| Atom     | X          | Y          | Z          |
|----------|------------|------------|------------|
| 1 C C1   | -0.8153856 | 0.0018584  | -2.5292359 |
| 2 N N1   | -0.0076080 | 0.0000015  | 0.0069609  |
| 3 C C2   | -0.6056235 | -1.2059500 | -1.8717847 |
| 4 C C6   | -0.6050219 | 1.2086951  | -1.8701861 |
| 5 C C5   | -0.1824163 | 1.2349054  | -0.5444135 |
| 6 C C3   | -0.1830476 | -1.2340843 | -0.5460274 |
| 7 H H2   | -0.7676472 | -2.1431778 | -2.3849468 |
| 8 H H6   | -0.7666090 | 2.1466724  | -2.3821219 |
| 9 H H7   | -1.1439983 | 0.0026314  | -3.5627262 |
| 10 C C4  | 0.0811380  | -2.5143276 | 0.2620033  |
| 11 C C7  | 1.5672427  | -2.5733125 | 0.6994424  |
| 12 H H1  | 1.8412775  | -1.7831052 | 1.4008763  |
| 13 H H8  | 2.2362648  | -2.5138774 | -0.1655373 |
| 14 H H9  | 1.7544688  | -3.5326748 | 1.1925066  |
| 15 C C8  | -0.8663260 | -2.5817913 | 1.4866062  |
| 16 H H4  | -0.6904016 | -1.7811859 | 2.2072537  |
| 17 H H10 | -0.7120474 | -3.5333416 | 2.0061081  |
| 18 H H11 | -1.9167325 | -2.5431799 | 1.1788333  |
| 19 C C9  | -0.1962408 | -3.7474929 | -0.6229126 |
| 20 H H3  | 0.4620842  | -3.7847549 | -1.4961540 |
| 21 H H12 | -1.2370333 | -3.7954905 | -0.9578081 |
| 22 H H13 | -0.0034497 | -4.6496875 | -0.0348991 |
| 23 C C10 | 0.0824153  | 2.5139597  | 0.2652872  |
| 24 C C11 | 1.5686052  | 2.5716721  | 0.7026211  |
| 25 H H5  | 2.2374939  | 2.5128958  | -0.1625067 |
| 26 H H16 | 1.8423233  | 1.7805161  | 1.4031180  |
| 27 H H17 | 1.7563872  | 3.5303618  | 1.1967832  |
| 28 C C12 | -0.8648432 | 2.5802038  | 1.4901203  |
| 29 H H14 | -0.6893206 | 1.7784212  | 2.2095554  |
| 30 H H18 | -1.9153143 | 2.5427052  | 1.1824361  |
| 31 H H19 | -0.7098988 | 3.5308809  | 2.0110284  |
| 32 C C13 | -0.1945323 | 3.7484215  | -0.6179541 |
| 33 H H15 | 0.4637766  | 3.7865983  | -1.4911685 |

|    |   |     |            |            |            |
|----|---|-----|------------|------------|------------|
| 34 | H | H20 | -0.0013807 | 4.6497424  | -0.0287237 |
| 35 | H | H21 | -1.2353190 | 3.7972598  | -0.9527469 |
| 36 | F | F1  | 0.4167203  | -0.0009689 | 1.3203132  |

**Cartesian coordinates for geometry minimized 2,6-di-*tert*-butyl pyridine + Cl**

**cation (1b-Cl):**

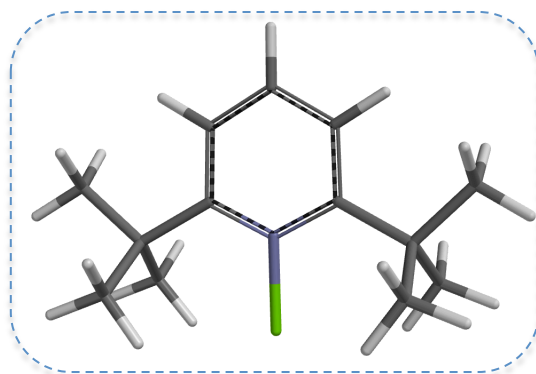

| Atom |    | X   | Y          | Z          |            |
|------|----|-----|------------|------------|------------|
| 1    | C  | C1  | -0.8375940 | 0.0018043  | -2.4068683 |
| 2    | N  | N1  | 0.0065405  | -0.0001172 | 0.1780200  |
| 3    | C  | C2  | -0.6109334 | -1.1967978 | -1.7493376 |
| 4    | C  | C6  | -0.6104954 | 1.1994141  | -1.7476744 |
| 5    | C  | C5  | -0.1742322 | 1.2384747  | -0.4241244 |
| 6    | C  | C3  | -0.1747657 | -1.2378117 | -0.4258099 |
| 7    | H  | H2  | -0.7744358 | -2.1265625 | -2.2710596 |
| 8    | H  | H6  | -0.7737061 | 2.1299383  | -2.2681431 |
| 9    | Cl | Cl1 | 0.4827766  | -0.0013802 | 1.8545350  |
| 10   | H  | H7  | -1.1840302 | 0.0025913  | -3.4357701 |
| 11   | C  | C4  | 0.0865667  | -2.6030961 | 0.2679741  |
| 12   | C  | C7  | 1.5771690  | -2.7495031 | 0.6844715  |
| 13   | H  | H1  | 1.8947323  | -2.0798011 | 1.4816704  |
| 14   | H  | H8  | 2.2364015  | -2.6001653 | -0.1775470 |
| 15   | H  | H9  | 1.7299133  | -3.7726734 | 1.0409613  |
| 16   | C  | C8  | -0.8934461 | -2.8460161 | 1.4491616  |
| 17   | H  | H4  | -0.7509982 | -2.1821728 | 2.2999487  |
| 18   | H  | H10 | -0.7463517 | -3.8694111 | 1.8076945  |
| 19   | H  | H11 | -1.9325252 | -2.7599699 | 1.1137842  |
| 20   | C  | C9  | -0.1779716 | -3.7546293 | -0.7376907 |
| 21   | H  | H3  | 0.4798385  | -3.7112225 | -1.6117440 |
| 22   | H  | H12 | -1.2203331 | -3.7947152 | -1.0696885 |
| 23   | H  | H13 | 0.0314141  | -4.6984392 | -0.2280347 |
| 24   | C  | C10 | 0.0878939  | 2.6027141  | 0.2714171  |
| 25   | C  | C11 | 1.5786859  | 2.7477473  | 0.6876700  |
| 26   | H  | H5  | 2.2375553  | 2.5995897  | -0.1748268 |
| 27   | H  | H16 | 1.8961614  | 2.0764722  | 1.4835755  |



|    |   |     |            |           |            |
|----|---|-----|------------|-----------|------------|
| 28 | H | H17 | 1.7320254  | 3.7702275 | 1.0458773  |
| 29 | C | C12 | -0.8916236 | 2.8446326 | 1.4532215  |
| 30 | H | H14 | -0.7487756 | 2.1801028 | 2.3034017  |
| 31 | H | H18 | -1.9308588 | 2.7588768 | 1.1182507  |
| 32 | H | H19 | -0.7443673 | 3.8677312 | 1.8125233  |
| 33 | C | C13 | -0.1763397 | 3.7556886 | -0.7326785 |
| 34 | H | H15 | 0.4811834  | 3.7130212 | -1.6069781 |
| 35 | H | H20 | 0.0337101  | 4.6987307 | -0.2218779 |
| 36 | H | H21 | -1.2187844 | 3.7967270 | -1.0643048 |

**Cartesian coordinates for geometry minimized 2,6-di-*tert*-butyl pyridine + Cl cation (1b-Cl) at the B3LYP/6-31G\*/SM8 (acetone) level:**

|    | Atom   | X          | Y          | Z          |
|----|--------|------------|------------|------------|
| 1  | C C1   | -0.8403860 | 0.0018033  | -2.4067225 |
| 2  | N N1   | 0.0051419  | -0.0001151 | 0.1761942  |
| 3  | C C2   | -0.6130383 | -1.1961978 | -1.7497632 |
| 4  | C C6   | -0.6125882 | 1.1988138  | -1.7481071 |
| 5  | C C5   | -0.1763412 | 1.2371096  | -0.4265391 |
| 6  | C C3   | -0.1768860 | -1.2364431 | -0.4282175 |
| 7  | H H2   | -0.7767653 | -2.1251510 | -2.2730114 |
| 8  | H H6   | -0.7760135 | 2.1285285  | -2.2701066 |
| 9  | Cl C11 | 0.4804495  | -0.0013820 | 1.8588655  |
| 10 | H H7   | -1.1875700 | 0.0025877  | -3.4343923 |
| 11 | C C4   | 0.0863240  | -2.6006941 | 0.2668197  |
| 12 | C C7   | 1.5742177  | -2.7469990 | 0.6854239  |
| 13 | H H1   | 1.8900100  | -2.0834877 | 1.4890025  |
| 14 | H H8   | 2.2381001  | -2.5867091 | -0.1709681 |
| 15 | H H9   | 1.7355224  | -3.7719481 | 1.0342031  |
| 16 | C C8   | -0.8905225 | -2.8463750 | 1.4473577  |
| 17 | H H4   | -0.7457491 | -2.1877271 | 2.3022757  |
| 18 | H H10  | -0.7518997 | -3.8717997 | 1.8047519  |
| 19 | H H11  | -1.9309392 | -2.7530957 | 1.1182573  |
| 20 | C C9   | -0.1760444 | -3.7517532 | -0.7380087 |
| 21 | H H3   | 0.4805046  | -3.7073350 | -1.6121810 |
| 22 | H H12  | -1.2173957 | -3.7937083 | -1.0710380 |
| 23 | H H13  | 0.0337907  | -4.6981544 | -0.2321012 |
| 24 | C C10  | 0.0876613  | 2.6003121  | 0.2702526  |
| 25 | C C11  | 1.5757425  | 2.7452555  | 0.6886125  |
| 26 | H H5   | 2.2392535  | 2.5862554  | -0.1683051 |
| 27 | H H16  | 1.8914924  | 2.0800840  | 1.4908294  |
| 28 | H H17  | 1.7376023  | 3.7694927  | 1.0392180  |
| 29 | C C12  | -0.8886924 | 2.8449803  | 1.4514113  |
| 30 | H H14  | -0.7434706 | 2.1856836  | 2.3057492  |
| 31 | H H18  | -1.9292613 | 2.7519179  | 1.1227279  |
| 32 | H H19  | -0.7499614 | 3.8701294  | 1.8095427  |
| 33 | C C13  | -0.1744052 | 3.7528130  | -0.7330044 |
| 34 | H H15  | 0.4818500  | 3.7091311  | -1.6074280 |
| 35 | H H20  | 0.0361081  | 4.6984469  | -0.2259483 |
| 36 | H H21  | -1.2158415 | 3.7957301  | -1.0656523 |

**Cartesian coordinates for geometry minimized 2,6-di-*tert*-butyl pyridine + Br cation (1b-Br):**

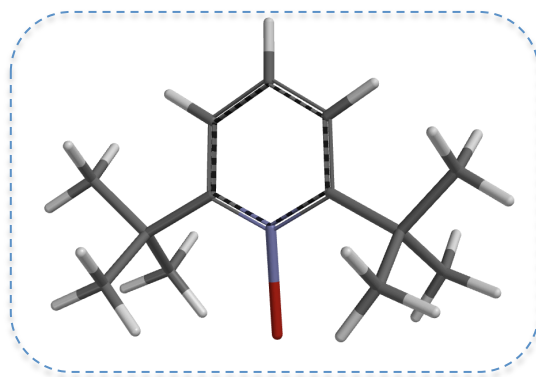

| Atom |       | X          | Y          | Z          |
|------|-------|------------|------------|------------|
| 1    | C C1  | -0.9251432 | 0.0017925  | -2.3610830 |
| 2    | N N1  | -0.0335458 | -0.0001516 | 0.2259457  |
| 3    | C C2  | -0.6738107 | -1.1981399 | -1.7100091 |
| 4    | C C6  | -0.6732567 | 1.2007286  | -1.7083771 |
| 5    | C C5  | -0.2084019 | 1.2402906  | -0.3879434 |
| 6    | C C3  | -0.2090079 | -1.2396769 | -0.3896139 |
| 7    | H H2  | -0.8387886 | -2.1263680 | -2.2295835 |
| 8    | H H6  | -0.8378412 | 2.1297126  | -2.2267366 |
| 9    | H H7  | -1.3016699 | 0.0025765  | -3.3776333 |
| 10   | C C4  | 0.0923253  | -2.6258999 | 0.2613572  |
| 11   | C C7  | 1.5894350  | -2.7330317 | 0.6870791  |
| 12   | H H1  | 1.8860423  | -2.0475144 | 1.4778788  |
| 13   | H H8  | 2.2446075  | -2.5730100 | -0.1761527 |
| 14   | H H9  | 1.7655337  | -3.7493022 | 1.0531535  |
| 15   | C C8  | -0.8976335 | -2.9522238 | 1.4228763  |
| 16   | H H4  | -0.7985797 | -2.3104939 | 2.2950903  |
| 17   | H H10 | -0.7110853 | -3.9802206 | 1.7493049  |
| 18   | H H11 | -1.9327860 | -2.8982012 | 1.0688652  |
| 19   | C C9  | -0.1185754 | -3.7601258 | -0.7864801 |
| 20   | H H3  | 0.5322622  | -3.6527297 | -1.6602535 |
| 21   | H H12 | -1.1599691 | -3.8426683 | -1.1137469 |
| 22   | H H13 | 0.1407849  | -4.7065565 | -0.3054912 |
| 23   | C C10 | 0.0936889  | 2.6255039  | 0.2648601  |
| 24   | C C11 | 1.5909260  | 2.7313168  | 0.6904570  |
| 25   | H H5  | 2.2458728  | 2.5719686  | -0.1730705 |
| 26   | H H16 | 1.8872672  | 2.0446865  | 1.4803920  |
| 27   | H H17 | 1.7676420  | 3.7470566  | 1.0577039  |
| 28   | C C12 | -0.8958848 | 2.9508331  | 1.4269801  |
| 29   | H H14 | -0.7966978 | 2.3082028  | 2.2985140  |
| 30   | H H18 | -1.9311508 | 2.8973885  | 1.0732164  |
| 31   | H H19 | -0.7090312 | 3.9784555  | 1.7544062  |
| 32   | C C13 | -0.1168537 | 3.7611966  | -0.7814617 |

|    |    |     |            |            |            |
|----|----|-----|------------|------------|------------|
| 33 | H  | H15 | 0.5337950  | 3.6546504  | -1.6554787 |
| 34 | H  | H20 | 0.1430073  | 4.7068858  | -0.2992960 |
| 35 | H  | H21 | -1.1582658 | 3.8446106  | -1.1084467 |
| 36 | Br | Br1 | 0.4147886  | -0.0015422 | 2.1627775  |

**Cartesian coordinates for geometry minimized 2,6-di-*tert*-butyl pyridine + I cation (1b- I) at the B3LYP/6-31G\*/LANL2DZ level:**

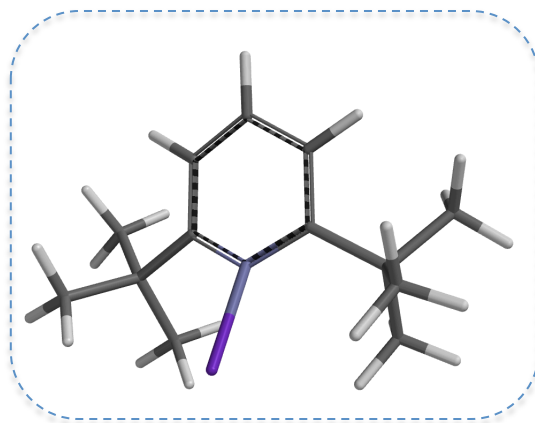

| Atom |   | X   | Y          | Z          |            |
|------|---|-----|------------|------------|------------|
| 1    | C | C1  | -0.4391450 | -0.0006867 | -2.5328415 |
| 2    | N | N1  | 0.4356437  | -0.0009252 | 0.0503267  |
| 3    | C | C2  | -0.3167948 | -1.1938785 | -1.8414288 |
| 4    | C | C6  | -0.3101791 | 1.1930383  | -1.8432877 |
| 5    | C | C5  | 0.1067361  | 1.2193629  | -0.5165189 |
| 6    | C | C3  | 0.0999141  | -1.2201592 | -0.5145197 |
| 7    | H | H2  | -0.5480865 | -2.1246544 | -2.3341821 |
| 8    | H | H6  | -0.5365337 | 2.1240960  | -2.3378114 |
| 9    | H | H7  | -0.6993825 | -0.0007661 | -3.5855831 |
| 10   | C | C4  | 0.0672006  | -2.5630347 | 0.2659293  |
| 11   | C | C7  | 1.4316376  | -3.2959964 | 0.2569615  |
| 12   | H | H1  | 2.1949738  | -2.8039015 | 0.8539289  |
| 13   | H | H8  | 1.8141320  | -3.4082796 | -0.7603967 |
| 14   | H | H9  | 1.2932110  | -4.2979368 | 0.6686024  |
| 15   | C | C8  | -0.4671951 | -2.3587095 | 1.7037328  |
| 16   | H | H4  | 0.1887293  | -1.7835733 | 2.3524893  |
| 17   | H | H10 | -0.5844486 | -3.3376336 | 2.1717722  |
| 18   | H | H11 | -1.4487696 | -1.8786890 | 1.6942843  |
| 19   | C | C9  | -0.9437548 | -3.5149194 | -0.4289093 |
| 20   | H | H3  | -0.5860813 | -3.8934831 | -1.3882338 |
| 21   | H | H12 | -1.9231480 | -3.0533890 | -0.5736734 |
| 22   | H | H13 | -1.0859853 | -4.3874804 | 0.2098904  |
| 23   | C | C10 | 0.0806072  | 2.5630108  | 0.2628786  |
| 24   | C | C11 | 1.4506084  | 3.2859680  | 0.2630515  |
| 25   | H | H5  | 1.8443961  | 3.3884109  | -0.7510301 |

|    |   |     |            |            |            |
|----|---|-----|------------|------------|------------|
| 26 | H | H16 | 2.2044024  | 2.7931745  | 0.8712934  |
| 27 | H | H17 | 1.3148758  | 4.2917513  | 0.6660488  |
| 28 | C | C12 | -0.4650531 | 2.3619693  | 1.6969392  |
| 29 | H | H14 | 0.1779998  | 1.7745244  | 2.3475798  |
| 30 | H | H18 | -1.4537793 | 1.8971293  | 1.6796765  |
| 31 | H | H19 | -0.5700014 | 3.3409596  | 2.1678996  |
| 32 | C | C13 | -0.9179861 | 3.5234145  | -0.4376066 |
| 33 | H | H15 | -0.5512549 | 3.9001146  | -1.3943320 |
| 34 | H | H20 | -1.0571797 | 4.3964343  | 0.2012276  |
| 35 | H | H21 | -1.9002142 | 3.0700374  | -0.5887869 |
| 36 | I | I1  | 2.0999053  | -0.0052998 | 1.4446292  |

**Cartesian coordinates for geometry minimized 4-methyl-2,6-di-*tert*-butyl pyridine**

**(1c):**

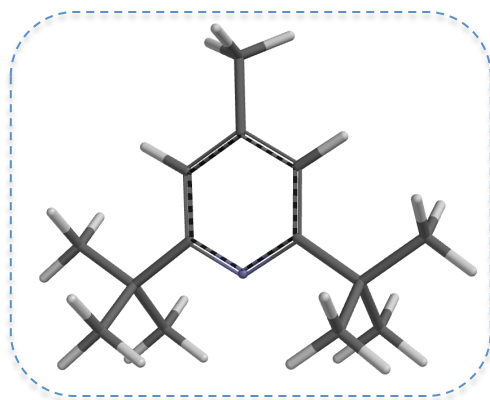

| Atom |   | X   | Y          | Z          |            |
|------|---|-----|------------|------------|------------|
| 1    | C | C1  | -0.6284016 | 0.0187703  | -2.2477325 |
| 2    | N | N1  | 0.1242676  | -0.0038483 | 0.4408914  |
| 3    | C | C2  | -0.4366253 | -1.1830914 | -1.5616066 |
| 4    | C | C6  | -0.4373023 | 1.2089264  | -1.5411106 |
| 5    | C | C5  | -0.0592428 | 1.1640502  | -0.1944256 |
| 6    | C | C3  | -0.0588919 | -1.1607703 | -0.2141019 |
| 7    | H | H2  | -0.5858641 | -2.1236251 | -2.0807194 |
| 8    | H | H6  | -0.5874527 | 2.1580282  | -2.0442575 |
| 9    | C | C4  | 0.1727253  | -2.4328237 | 0.6190273  |
| 10   | C | C7  | 1.6388383  | -2.4385614 | 1.1088571  |
| 11   | H | H1  | 1.8622217  | -1.5244278 | 1.6656124  |
| 12   | H | H8  | 2.3366234  | -2.5036738 | 0.2650820  |
| 13   | H | H9  | 1.8180384  | -3.3004130 | 1.7634867  |
| 14   | C | C8  | -0.0907855 | -3.7203686 | -0.1815422 |
| 15   | H | H3  | 0.5796658  | -3.8086575 | -1.0444375 |
| 16   | H | H10 | -1.1247757 | -3.7735015 | -0.5423196 |
| 17   | H | H11 | 0.0804665  | -4.5932806 | 0.4584769  |
| 18   | C | C9  | -0.7708848 | -2.4013599 | 1.8423063  |
| 19   | H | H7  | -0.6099456 | -1.4942609 | 2.4307592  |
| 20   | H | H12 | -0.5901002 | -3.2723577 | 2.4841196  |

|    |   |     |            |            |            |
|----|---|-----|------------|------------|------------|
| 21 | H | H13 | -1.8223563 | -2.4227111 | 1.5309522  |
| 22 | C | C10 | 0.1729022  | 2.4215834  | 0.6602370  |
| 23 | C | C11 | -0.7661772 | 2.3674850  | 1.8861328  |
| 24 | H | H14 | -0.6015602 | 1.4513849  | 2.4594140  |
| 25 | H | H16 | -1.8187813 | 2.3918852  | 1.5788629  |
| 26 | H | H17 | -0.5845137 | 3.2285550  | 2.5408303  |
| 27 | C | C12 | 1.6407279  | 2.4214186  | 1.1447604  |
| 28 | H | H5  | 1.8677222  | 1.4981830  | 1.6847944  |
| 29 | H | H18 | 1.8208102  | 3.2720703  | 1.8136303  |
| 30 | H | H19 | 2.3354283  | 2.5023099  | 0.2998326  |
| 31 | C | C13 | -0.0966030 | 3.7229313  | -0.1155867 |
| 32 | H | H15 | 0.5712844  | 3.8310558  | -0.9782974 |
| 33 | H | H20 | 0.0726761  | 4.5841527  | 0.5406414  |
| 34 | H | H21 | -1.1316783 | 3.7791115  | -0.4728246 |
| 35 | C | C14 | -1.0051464 | 0.0313969  | -3.7096556 |
| 36 | H | H4  | -0.1083008 | 0.0401894  | -4.3434377 |
| 37 | H | H22 | -1.5922249 | 0.9198166  | -3.9648506 |
| 38 | H | H23 | -1.5867840 | -0.8555718 | -3.9818009 |

**Cartesian coordinates for geometry minimized 4-methyl-2,6-di-*tert*-butyl pyridine**

**(1c) at the B3LYP/6-31G\*/SM8 (acetone) level:**

| Atom     | X          | Y          | Z          |
|----------|------------|------------|------------|
| 1 C C1   | -0.6212014 | 0.0187613  | -2.2470346 |
| 2 N N1   | 0.1241599  | -0.0039484 | 0.4471678  |
| 3 C C2   | -0.4309204 | -1.1827829 | -1.5582805 |
| 4 C C6   | -0.4316626 | 1.2085313  | -1.5377253 |
| 5 C C5   | -0.0581096 | 1.1662310  | -0.1909117 |
| 6 C C3   | -0.0577181 | -1.1630742 | -0.2106811 |
| 7 H H2   | -0.5782762 | -2.1229461 | -2.0775189 |
| 8 H H6   | -0.5800082 | 2.1572810  | -2.0409609 |
| 9 C C4   | 0.1702272  | -2.4405863 | 0.6178154  |
| 10 C C7  | 1.6373152  | -2.4636483 | 1.1022307  |
| 11 H H1  | 1.8791879  | -1.5592625 | 1.6690420  |
| 12 H H8  | 2.3357535  | -2.5297244 | 0.2589213  |
| 13 H H9  | 1.8134056  | -3.3321755 | 1.7483926  |
| 14 C C8  | -0.1049135 | -3.7221002 | -0.1872315 |
| 15 H H3  | 0.5617607  | -3.8159295 | -1.0519857 |
| 16 H H10 | -1.1399494 | -3.7703071 | -0.5447142 |
| 17 H H11 | 0.0616943  | -4.6001431 | 0.4469714  |
| 18 C C9  | -0.7659766 | -2.4148220 | 1.8461063  |
| 19 H H7  | -0.6012597 | -1.5170582 | 2.4492828  |
| 20 H H12 | -0.5896234 | -3.2924115 | 2.4796697  |
| 21 H H13 | -1.8210542 | -2.4282420 | 1.5459234  |
| 22 C C10 | 0.1701966  | 2.4292858  | 0.6592582  |
| 23 C C11 | -0.7623323 | 2.3813374  | 1.8895945  |
| 24 H H14 | -0.5941020 | 1.4748336  | 2.4785829  |
| 25 H H16 | -1.8182743 | 2.3971480  | 1.5926132  |
| 26 H H17 | -0.5857981 | 3.2496116  | 2.5356762  |
| 27 C C12 | 1.6386002  | 2.4461427  | 1.1397547  |

|    |   |     |            |            |            |
|----|---|-----|------------|------------|------------|
| 28 | H | H5  | 1.8832117  | 1.5326777  | 1.6906227  |
| 29 | H | H18 | 1.8153437  | 3.3038783  | 1.7999909  |
| 30 | H | H19 | 2.3346826  | 2.5272480  | 0.2958409  |
| 31 | C | C13 | -0.1100037 | 3.7246628  | -0.1214590 |
| 32 | H | H15 | 0.5544337  | 3.8378720  | -0.9856993 |
| 33 | H | H20 | 0.0548059  | 4.5911320  | 0.5289689  |
| 34 | H | H21 | -1.1459397 | 3.7763282  | -0.4759083 |
| 35 | C | C14 | -0.9926382 | 0.0314527  | -3.7072396 |
| 36 | H | H4  | -0.0936265 | 0.0408316  | -4.3372202 |
| 37 | H | H22 | -1.5788784 | 0.9191163  | -3.9652977 |
| 38 | H | H23 | -1.5725123 | -0.8552012 | -3.9825581 |

**Cartesian coordinates for geometry minimized 4-methyl-2,6-di-*tert*-butyl pyridine**

**+ F cation (1c-F):**

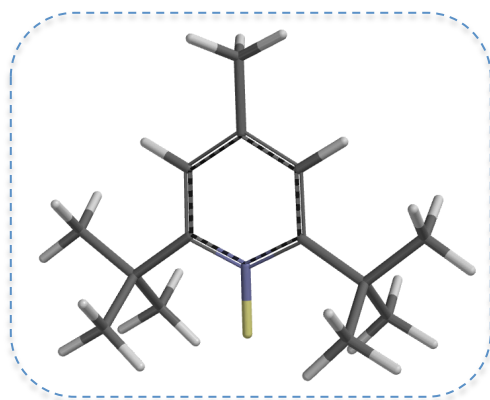

| Atom     | X          | Y          | Z          |
|----------|------------|------------|------------|
| 1 C C1   | -0.7321229 | -0.0032640 | -2.0917719 |
| 2 N N1   | 0.1211046  | -0.0033231 | 0.5206143  |
| 3 C C2   | -0.4943470 | -1.1937572 | -1.4096610 |
| 4 C C6   | -0.4903184 | 1.1891562  | -1.4092914 |
| 5 C C5   | -0.0579421 | 1.2312254  | -0.0916995 |
| 6 C C3   | -0.0606379 | -1.2352426 | -0.0897907 |
| 7 H H2   | -0.6537221 | -2.1269697 | -1.9275283 |
| 8 H H6   | -0.6476660 | 2.1223756  | -1.9286416 |
| 9 C1 C11 | 0.5797063  | -0.0023829 | 2.2062999  |
| 10 C C4  | 0.2025965  | -2.6016394 | 0.6019078  |
| 11 C C7  | 1.6878499  | -2.7428057 | 1.0310239  |
| 12 H H1  | 1.9958122  | -2.0767939 | 1.8355615  |
| 13 H H8  | 2.3571422  | -2.5813527 | 0.1790149  |
| 14 H H9  | 1.8503831  | -3.7665781 | 1.3827240  |
| 15 C C8  | -0.7814430 | -2.8524004 | 1.7753399  |
| 16 H H4  | -0.6469283 | -2.1919951 | 2.6306486  |
| 17 H H10 | -0.6403048 | -3.8768399 | 2.1346810  |
| 18 H H11 | -1.8197373 | -2.7645944 | 1.4380504  |
| 19 C C9  | -0.0480683 | -3.7529742 | -0.4053151 |
| 20 H H3  | 0.6125788  | -3.7039922 | -1.2762015 |

|    |   |     |            |            |            |
|----|---|-----|------------|------------|------------|
| 21 | H | H12 | -1.0873812 | -3.8006228 | -0.7438755 |
| 22 | H | H13 | 0.1643737  | -4.6986449 | 0.1009725  |
| 23 | C | C10 | 0.2083600  | 2.5969887  | 0.6003000  |
| 24 | C | C11 | 1.6937308  | 2.7358062  | 1.0293527  |
| 25 | H | H5  | 2.3627276  | 2.5728707  | 0.1773745  |
| 26 | H | H16 | 2.0005454  | 2.0693134  | 1.8339593  |
| 27 | H | H17 | 1.8583227  | 3.7593220  | 1.3808950  |
| 28 | C | C12 | -0.7752750 | 2.8504735  | 1.7734057  |
| 29 | H | H14 | -0.6423313 | 2.1902089  | 2.6290965  |
| 30 | H | H18 | -1.8136679 | 2.7643701  | 1.4359330  |
| 31 | H | H19 | -0.6324358 | 3.8748147  | 2.1323995  |
| 32 | C | C13 | -0.0401574 | 3.7482461  | -0.4075754 |
| 33 | H | H15 | 0.6206729  | 3.6977380  | -1.2782550 |
| 34 | H | H20 | 0.1735664  | 4.6939649  | 0.0980861  |
| 35 | H | H21 | -1.0792947 | 3.7973129  | -0.7465188 |
| 36 | C | C14 | -1.2319662 | 0.0088306  | -3.5045595 |
| 37 | H | H7  | -0.6299916 | 0.6780400  | -4.1282303 |
| 38 | H | H22 | -2.2628047 | 0.3830097  | -3.5379331 |
| 39 | H | H23 | -1.2209295 | -0.9878947 | -3.9507927 |

**Cartesian coordinates for geometry minimized 4-methyl-2,6-di-*tert*-butyl pyridine**

**+ Cl cation (1c-Cl):**

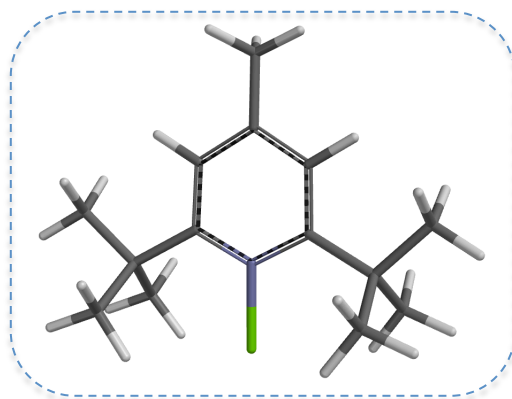

| Atom | X  | Y   | Z          |            |            |
|------|----|-----|------------|------------|------------|
| 1    | C  | C1  | -0.7323920 | -0.0026391 | -2.0920847 |
| 2    | N  | N1  | 0.1203104  | -0.0029836 | 0.5231432  |
| 3    | C  | C2  | -0.4948810 | -1.1928246 | -1.4085605 |
| 4    | C  | C6  | -0.4890660 | 1.1893390  | -1.4086707 |
| 5    | C  | C5  | -0.0569179 | 1.2324233  | -0.0892231 |
| 6    | C  | C3  | -0.0604620 | -1.2358068 | -0.0872536 |
| 7    | H  | H2  | -0.6544210 | -2.1266098 | -1.9252725 |
| 8    | H  | H6  | -0.6437656 | 2.1236661  | -1.9266022 |
| 9    | Cl | Cl1 | 0.5782652  | -0.0022435 | 2.2039077  |
| 10   | C  | C4  | 0.2025356  | -2.6029612 | 0.6030984  |
| 11   | C  | C7  | 1.6903658  | -2.7426481 | 1.0307164  |
| 12   | H  | H1  | 1.9988597  | -2.0701274 | 1.8290800  |

|    |   |     |            |            |            |
|----|---|-----|------------|------------|------------|
| 13 | H | H8  | 2.3551595  | -2.5906483 | 0.1733662  |
| 14 | H | H9  | 1.8459406  | -3.7645438 | 1.3897467  |
| 15 | C | C8  | -0.7846062 | -2.8530097 | 1.7766097  |
| 16 | H | H4  | -0.6537445 | -2.1873803 | 2.6279506  |
| 17 | H | H10 | -0.6341039 | -3.8752895 | 2.1371058  |
| 18 | H | H11 | -1.8214136 | -2.7734362 | 1.4325988  |
| 19 | C | C9  | -0.0480992 | -3.7549937 | -0.4051577 |
| 20 | H | H3  | 0.6136520  | -3.7052260 | -1.2759024 |
| 21 | H | H12 | -1.0882781 | -3.8022553 | -0.7428596 |
| 22 | H | H13 | 0.1654840  | -4.6979839 | 0.1044271  |
| 23 | C | C10 | 0.2093099  | 2.5988271  | 0.6018151  |
| 24 | C | C11 | 1.6972887  | 2.7358603  | 1.0291259  |
| 25 | H | H5  | 2.3616566  | 2.5828302  | 0.1716008  |
| 26 | H | H16 | 2.0046933  | 2.0623067  | 1.8270574  |
| 27 | H | H17 | 1.8550046  | 3.7573071  | 1.3884918  |
| 28 | C | C12 | -0.7772636 | 2.8513378  | 1.7752257  |
| 29 | H | H14 | -0.6475806 | 2.1859717  | 2.6269585  |
| 30 | H | H18 | -1.8142100 | 2.7732288  | 1.4312590  |
| 31 | H | H19 | -0.6251947 | 3.8734994  | 2.1354385  |
| 32 | C | C13 | -0.0395704 | 3.7512043  | -0.4064972 |
| 33 | H | H15 | 0.6225718  | 3.7008092  | -1.2769415 |
| 34 | H | H20 | 0.1747487  | 4.6940330  | 0.1030498  |
| 35 | H | H21 | -1.0795258 | 3.7995356  | -0.7448729 |
| 36 | C | C14 | -1.2332060 | 0.0072990  | -3.5077323 |
| 37 | H | H7  | -0.6379912 | 0.6844678  | -4.1298077 |
| 38 | H | H22 | -2.2690326 | 0.3687908  | -3.5394639 |
| 39 | H | H23 | -1.2101208 | -0.9891266 | -3.9548706 |

**Cartesian coordinates for geometry minimized 4-methyl-2,6-di-*tert*-butyl pyridine**

**+ Cl cation (1c-Cl) at the B3LYP/6-31G\*/SM8 (acetone) level:**

| Atom |    | X   | Y          | Z          |            |
|------|----|-----|------------|------------|------------|
| 1    | C  | C1  | -0.7321229 | -0.0032640 | -2.0917719 |
| 2    | N  | N1  | 0.1211046  | -0.0033231 | 0.5206143  |
| 3    | C  | C2  | -0.4943470 | -1.1937572 | -1.4096610 |
| 4    | C  | C6  | -0.4903184 | 1.1891562  | -1.4092914 |
| 5    | C  | C5  | -0.0579421 | 1.2312254  | -0.0916995 |
| 6    | C  | C3  | -0.0606379 | -1.2352426 | -0.0897907 |
| 7    | H  | H2  | -0.6537221 | -2.1269697 | -1.9275283 |
| 8    | H  | H6  | -0.6476660 | 2.1223756  | -1.9286416 |
| 9    | Cl | Cl1 | 0.5797063  | -0.0023829 | 2.2062999  |
| 10   | C  | C4  | 0.2025965  | -2.6016394 | 0.6019078  |
| 11   | C  | C7  | 1.6878499  | -2.7428057 | 1.0310239  |
| 12   | H  | H1  | 1.9958122  | -2.0767939 | 1.8355615  |
| 13   | H  | H8  | 2.3571422  | -2.5813527 | 0.1790149  |
| 14   | H  | H9  | 1.8503831  | -3.7665781 | 1.3827240  |
| 15   | C  | C8  | -0.7814430 | -2.8524004 | 1.7753399  |
| 16   | H  | H4  | -0.6469283 | -2.1919951 | 2.6306486  |
| 17   | H  | H10 | -0.6403048 | -3.8768399 | 2.1346810  |
| 18   | H  | H11 | -1.8197373 | -2.7645944 | 1.4380504  |



|    |   |     |            |            |            |
|----|---|-----|------------|------------|------------|
| 19 | C | C9  | -0.0480683 | -3.7529742 | -0.4053151 |
| 20 | H | H3  | 0.6125788  | -3.7039922 | -1.2762015 |
| 21 | H | H12 | -1.0873812 | -3.8006228 | -0.7438755 |
| 22 | H | H13 | 0.1643737  | -4.6986449 | 0.1009725  |
| 23 | C | C10 | 0.2083600  | 2.5969887  | 0.6003000  |
| 24 | C | C11 | 1.6937308  | 2.7358062  | 1.0293527  |
| 25 | H | H5  | 2.3627276  | 2.5728707  | 0.1773745  |
| 26 | H | H16 | 2.0005454  | 2.0693134  | 1.8339593  |
| 27 | H | H17 | 1.8583227  | 3.7593220  | 1.3808950  |
| 28 | C | C12 | -0.7752750 | 2.8504735  | 1.7734057  |
| 29 | H | H14 | -0.6423313 | 2.1902089  | 2.6290965  |
| 30 | H | H18 | -1.8136679 | 2.7643701  | 1.4359330  |
| 31 | H | H19 | -0.6324358 | 3.8748147  | 2.1323995  |
| 32 | C | C13 | -0.0401574 | 3.7482461  | -0.4075754 |
| 33 | H | H15 | 0.6206729  | 3.6977380  | -1.2782550 |
| 34 | H | H20 | 0.1735664  | 4.6939649  | 0.0980861  |
| 35 | H | H21 | -1.0792947 | 3.7973129  | -0.7465188 |
| 36 | C | C14 | -1.2319662 | 0.0088306  | -3.5045595 |
| 37 | H | H7  | -0.6299916 | 0.6780400  | -4.1282303 |
| 38 | H | H22 | -2.2628047 | 0.3830097  | -3.5379331 |
| 39 | H | H23 | -1.2209295 | -0.9878947 | -3.9507927 |

**Cartesian coordinates for geometry minimized 4-methyl-2,6-di-*tert*-butyl pyridine**

**+ Br cation (1c-Br):**

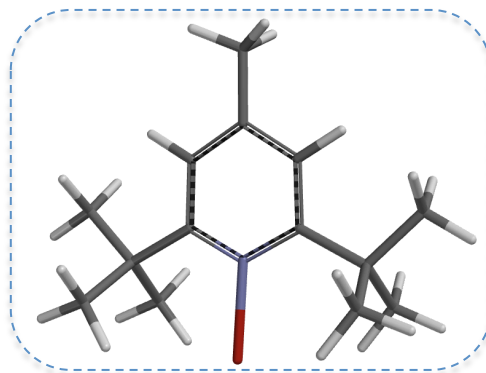

| Atom |   | X  | Y          | Z          |            |
|------|---|----|------------|------------|------------|
| 1    | C | C1 | -0.8268129 | -0.0005627 | -2.0434049 |
| 2    | N | N1 | 0.0901652  | -0.0019158 | 0.5662924  |
| 3    | C | C2 | -0.5545282 | -1.1937201 | -1.3711676 |
| 4    | C | C6 | -0.5622387 | 1.1930933  | -1.3666207 |
| 5    | C | C5 | -0.0902469 | 1.2354396  | -0.0538007 |
| 6    | C | C3 | -0.0841465 | -1.2371064 | -0.0567113 |
| 7    | H | H2 | -0.7162060 | -2.1252015 | -1.8871348 |
| 8    | H | H6 | -0.7302586 | 2.1254017  | -1.8794595 |
| 9    | C | C4 | 0.2264717  | -2.6245007 | 0.5883403  |
| 10   | C | C7 | 1.7221046  | -2.7199566 | 1.0204793  |
| 11   | H | H1 | 2.0099435  | -2.0294907 | 1.8102307  |

|    |    |     |            |            |            |
|----|----|-----|------------|------------|------------|
| 12 | H  | H8  | 2.3799112  | -2.5566088 | 0.1597923  |
| 13 | H  | H9  | 1.9047864  | -3.7337231 | 1.3903955  |
| 14 | C  | C8  | -0.7644797 | -2.9636272 | 1.7451397  |
| 15 | H  | H4  | -0.6700909 | -2.3267630 | 2.6215076  |
| 16 | H  | H10 | -0.5747408 | -3.9929265 | 2.0657710  |
| 17 | H  | H11 | -1.7989347 | -2.9111848 | 1.3888042  |
| 18 | C  | C9  | 0.0301437  | -3.7574104 | -0.4634727 |
| 19 | H  | H3  | 0.6809044  | -3.6391760 | -1.3359321 |
| 20 | H  | H12 | -1.0096640 | -3.8498960 | -0.7929522 |
| 21 | H  | H13 | 0.2986435  | -4.7027179 | 0.0148659  |
| 22 | C  | C10 | 0.2171316  | 2.6220345  | 0.5946524  |
| 23 | C  | C11 | 1.7122773  | 2.7206109  | 1.0277159  |
| 24 | H  | H5  | 2.3707914  | 2.5565880  | 0.1676984  |
| 25 | H  | H16 | 2.0007676  | 2.0322439  | 1.8190545  |
| 26 | H  | H17 | 1.8934405  | 3.7353857  | 1.3955073  |
| 27 | C  | C12 | -0.7753186 | 2.9565145  | 1.7513660  |
| 28 | H  | H14 | -0.6830437 | 2.3148271  | 2.6244472  |
| 29 | H  | H18 | -1.8093279 | 2.9068986  | 1.3932001  |
| 30 | H  | H19 | -0.5850571 | 3.9838745  | 2.0780045  |
| 31 | C  | C13 | 0.0185905  | 3.7564639  | -0.4552144 |
| 32 | H  | H15 | 0.6684338  | 3.6396024  | -1.3284809 |
| 33 | H  | H20 | 0.2871095  | 4.7013376  | 0.0239501  |
| 34 | H  | H21 | -1.0216900 | 3.8487668  | -0.7836160 |
| 35 | Br | Br1 | 0.5184882  | -0.0029731 | 2.5054794  |
| 36 | C  | C14 | -1.3481808 | 0.0047148  | -3.4531967 |
| 37 | H  | H7  | -0.5308437 | 0.1915462  | -4.1626623 |
| 38 | H  | H22 | -2.0898648 | 0.7960051  | -3.5998015 |
| 39 | H  | H23 | -1.8044302 | -0.9518875 | -3.7190667 |

**Cartesian coordinates for geometry minimized 4-methyl-2,6-di-*tert*-butyl pyridine**

**+ I cation (1c- I) at the B3LYP/6-31G\*/LANL2DZ level:**

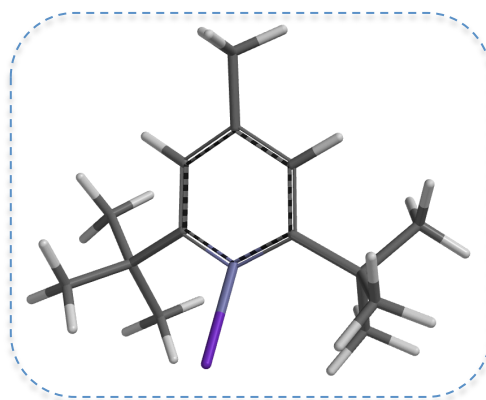

| Atom   | X          | Y          | Z          |
|--------|------------|------------|------------|
| 1 C C1 | -0.3656870 | -0.0000989 | -2.2102900 |
| 2 N N1 | 0.5022254  | -0.0012404 | 0.4079835  |

|    |   |     |            |            |            |
|----|---|-----|------------|------------|------------|
| 3  | C | C2  | -0.2514858 | -1.1868603 | -1.4884587 |
| 4  | C | C6  | -0.2436710 | 1.1868304  | -1.4899658 |
| 5  | C | C5  | 0.1702778  | 1.2151586  | -0.1668479 |
| 6  | C | C3  | 0.1626493  | -1.2162254 | -0.1653661 |
| 7  | H | H2  | -0.4941952 | -2.1204654 | -1.9719039 |
| 8  | H | H6  | -0.4801908 | 2.1214325  | -1.9745711 |
| 9  | C | C4  | 0.1241351  | -2.5581825 | 0.6165510  |
| 10 | C | C7  | 1.4792944  | -3.3066383 | 0.5820558  |
| 11 | H | H1  | 2.2622653  | -2.8149741 | 1.1538343  |
| 12 | H | H8  | 1.8349824  | -3.4329114 | -0.4434773 |
| 13 | H | H9  | 1.3418492  | -4.3029015 | 1.0078142  |
| 14 | C | C8  | -0.3761179 | -2.3471726 | 2.0651387  |
| 15 | H | H4  | 0.3046516  | -1.7844696 | 2.6992220  |
| 16 | H | H10 | -0.5005094 | -3.3243176 | 2.5351804  |
| 17 | H | H11 | -1.3485646 | -1.8490435 | 2.0779785  |
| 18 | C | C9  | -0.9127685 | -3.4971948 | -0.0568739 |
| 19 | H | H3  | -0.5788561 | -3.8812114 | -1.0225426 |
| 20 | H | H12 | -1.8876794 | -3.0211431 | -0.1836318 |
| 21 | H | H13 | -1.0551328 | -4.3673756 | 0.5853273  |
| 22 | C | C10 | 0.1390957  | 2.5580220  | 0.6138149  |
| 23 | C | C11 | 1.4988105  | 3.2984513  | 0.5812490  |
| 24 | H | H5  | 1.8589179  | 3.4189626  | -0.4434310 |
| 25 | H | H16 | 2.2768526  | 2.8044417  | 1.1577008  |
| 26 | H | H17 | 1.3656545  | 4.2970321  | 1.0028629  |
| 27 | C | C12 | -0.3647605 | 2.3508979  | 2.0617100  |
| 28 | H | H14 | 0.3107190  | 1.7828233  | 2.6966899  |
| 29 | H | H18 | -1.3411058 | 1.8604126  | 2.0731828  |
| 30 | H | H19 | -0.4821969 | 3.3289701  | 2.5316498  |
| 31 | C | C13 | -0.8908952 | 3.5029135  | -0.0618815 |
| 32 | H | H15 | -0.5530784 | 3.8845282  | -1.0271680 |
| 33 | H | H20 | -1.0290923 | 4.3741829  | 0.5797348  |
| 34 | H | H21 | -1.8684414 | 3.0327026  | -0.1901052 |
| 35 | I | I1  | 2.1988780  | -0.0053861 | 1.7551371  |
| 36 | C | C14 | -0.6589015 | -0.0000189 | -3.6793782 |
| 37 | H | H7  | 0.2832533  | -0.0015435 | -4.2397791 |
| 38 | H | H22 | -1.2142006 | 0.8878465  | -3.9847444 |
| 39 | H | H23 | -1.2169808 | -0.8862339 | -3.9844013 |

**Cartesian coordinates for geometry minimized 4-*tert*-butyl pyridine (1d) at the**

**B3LYP/6-31G\*/SM8 (acetone) level:**

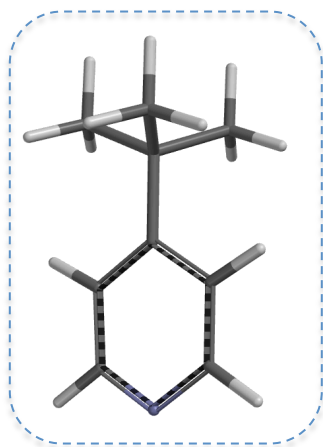

| Atom     | X          | Y          | Z          |
|----------|------------|------------|------------|
| 1 C C1   | -0.0162441 | -0.0280881 | 0.5708035  |
| 2 N N1   | 0.0243695  | -0.0018726 | 3.4198254  |
| 3 C C2   | -0.5088386 | -1.0960941 | 1.3311343  |
| 4 C C6   | 0.4993514  | 1.0556825  | 1.3013208  |
| 5 C C5   | 0.4975842  | 1.0242972  | 2.6915516  |
| 6 C C3   | -0.4668378 | -1.0371726 | 2.7243038  |
| 7 H H2   | -0.9283441 | -1.9776933 | 0.8610756  |
| 8 H H6   | 0.9028770  | 1.9285990  | 0.7981336  |
| 9 H H5   | 0.8961523  | 1.8643753  | 3.2572091  |
| 10 H H3  | -0.8503401 | -1.8678842 | 3.3141297  |
| 11 C C4  | -0.0144542 | -0.0110348 | -0.9661056 |
| 12 C C7  | -0.7888372 | 1.2299156  | -1.4673411 |
| 13 H H4  | -0.3446463 | 2.1649996  | -1.1113799 |
| 14 H H8  | -1.8337108 | 1.2107073  | -1.1370778 |
| 15 H H9  | -0.7839552 | 1.2609468  | -2.5633546 |
| 16 C C8  | -0.6719191 | -1.2680469 | -1.5631408 |
| 17 H H7  | -0.1363641 | -2.1846107 | -1.2911561 |
| 18 H H10 | -0.6661800 | -1.2022387 | -2.6567102 |
| 19 H H11 | -1.7163327 | -1.3756291 | -1.2487450 |
| 20 C C9  | 1.4474883  | 0.0643320  | -1.4656700 |
| 21 H H1  | 2.0287576  | -0.8023252 | -1.1306587 |
| 22 H H12 | 1.9561794  | 0.9648568  | -1.1064045 |
| 23 H H13 | 1.4742446  | 0.0839779  | -2.5617435 |

**Cartesian coordinates for geometry minimized 4-*tert*-butyl pyridine + Cl cation**

**(1d-Cl) at the B3LYP/6-31G\*/SM8 (acetone) level:**

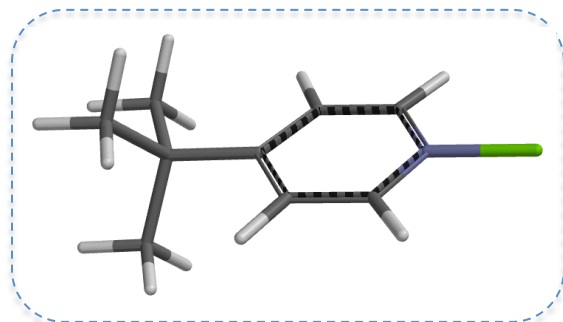

| Atom |        | X          | Y          | Z          |
|------|--------|------------|------------|------------|
| 1    | C C1   | -0.0168800 | 0.0238236  | 0.3580877  |
| 2    | N N1   | 0.0199414  | -0.0655038 | 3.1236867  |
| 3    | C C2   | 0.4582897  | -1.1034779 | 1.0558977  |
| 4    | C C6   | -0.4696841 | 1.1018311  | 1.1355522  |
| 5    | C C5   | -0.4476572 | 1.0494411  | 2.5159949  |
| 6    | C C3   | 0.4731570  | -1.1421331 | 2.4330715  |
| 7    | H H2   | 0.8264225  | -1.9786320 | 0.5342313  |
| 8    | H H6   | -0.8519122 | 2.0086900  | 0.6850832  |
| 9    | H H5   | -0.7871592 | 1.8573793  | 3.1512649  |
| 10   | H H3   | 0.8276820  | -1.9877491 | 3.0080262  |
| 11   | Cl C11 | 0.0414484  | -0.1229053 | 4.8591048  |
| 12   | C C4   | -0.0173859 | 0.0407103  | -1.1713867 |
| 13   | C C7   | 1.4469948  | -0.0881652 | -1.6607719 |
| 14   | H H1   | 1.9117556  | -1.0226243 | -1.3314806 |
| 15   | H H8   | 2.0656503  | 0.7418628  | -1.3027446 |
| 16   | H H9   | 1.4747249  | -0.0774781 | -2.7560186 |
| 17   | C C8   | -0.8430916 | -1.1638530 | -1.6861646 |
| 18   | H H7   | -0.4247953 | -2.1235718 | -1.3678808 |
| 19   | H H10  | -0.8534684 | -1.1630856 | -2.7815281 |
| 20   | H H11  | -1.8825476 | -1.1179576 | -1.3433862 |
| 21   | C C9   | -0.6223383 | 1.3366583  | -1.7401576 |
| 22   | H H4   | -0.0491923 | 2.2254824  | -1.4535975 |
| 23   | H H12  | -1.6639914 | 1.4785291  | -1.4309968 |
| 24   | H H13  | -0.6159630 | 1.2927287  | -2.8338872 |

**Cartesian coordinates for geometry minimized 4-trifluoromethyl pyridine (1e) at the B3LYP/6-31G\*/SM8 (acetone) level:**

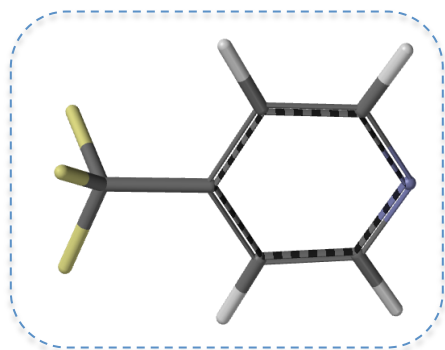

| Atom |      | X          | Y          | Z          |
|------|------|------------|------------|------------|
| 1    | C C1 | -0.0222821 | -0.0106755 | -0.4744081 |
| 2    | N N1 | 0.0267116  | 0.0033123  | 2.3239245  |
| 3    | C C2 | -0.5036816 | -1.1015115 | 0.2453358  |
| 4    | C C6 | 0.4847055  | 1.0895113  | 0.2199553  |
| 5    | C C5 | 0.4861782  | 1.0448612  | 1.6120285  |
| 6    | C C3 | -0.4564999 | -1.0422108 | 1.6391966  |
| 7    | H H2 | -0.9062120 | -1.9736740 | -0.2564578 |
| 8    | H H6 | 0.8676625  | 1.9591618  | -0.3035633 |
| 9    | H H5 | 0.8741630  | 1.8832196  | 2.1853080  |
| 10   | H H3 | -0.8256281 | -1.8753595 | 2.2324071  |
| 11   | C C4 | -0.0139667 | -0.0025448 | -1.9816058 |
| 12   | F F1 | -0.6038592 | 1.1107440  | -2.4726993 |
| 13   | F F2 | -0.6570396 | -1.0663946 | -2.5049903 |
| 14   | F F3 | 1.2497487  | -0.0184396 | -2.4644314 |

**Cartesian coordinates for geometry minimized 4-trifluoromethyl pyridine + Cl cation (1e-Cl) at the B3LYP/6-31G\*/SM8 (acetone) level:**

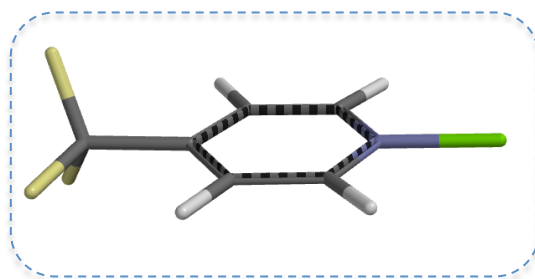

| Atom |      | X          | Y          | Z          |
|------|------|------------|------------|------------|
| 1    | C C1 | -0.0261847 | 0.0278727  | -0.7328823 |
| 2    | N N1 | 0.0206052  | -0.0475513 | 1.9879863  |

|    |    |     |            |            |            |
|----|----|-----|------------|------------|------------|
| 3  | C  | C2  | 0.4323894  | -1.1143339 | -0.0723004 |
| 4  | C  | C6  | -0.4605921 | 1.1288349  | 0.0026614  |
| 5  | C  | C5  | -0.4317600 | 1.0768035  | 1.3869656  |
| 6  | C  | C3  | 0.4513024  | -1.1395095 | 1.3102452  |
| 7  | H  | H2  | 0.7774446  | -1.9914925 | -0.6074554 |
| 8  | H  | H6  | -0.8242905 | 2.0318603  | -0.4721054 |
| 9  | H  | H5  | -0.7544556 | 1.8939928  | 2.0205980  |
| 10 | H  | H3  | 0.7936729  | -1.9894744 | 1.8878802  |
| 11 | Cl | Cl1 | 0.0519635  | -0.0957572 | 3.7226794  |
| 12 | C  | C4  | -0.0160889 | 0.0546331  | -2.2475879 |
| 13 | F  | F1  | -0.6208038 | -1.0415819 | -2.7466525 |
| 14 | F  | F2  | 1.2522653  | 0.0666041  | -2.7050910 |
| 15 | F  | F3  | -0.6454677 | 1.1390992  | -2.7349412 |

**Cartesian coordinates for geometry minimized 4-cyanopyridine (1f) at the**

**B3LYP/6-31G\*/SM8 (acetone) level:**

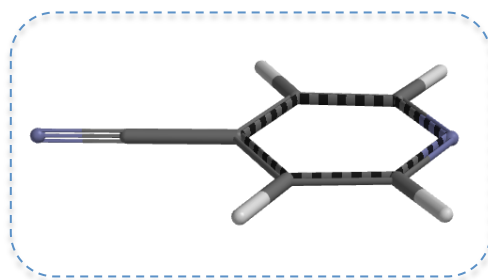

| Atom |   | X  | Y          | Z         |            |
|------|---|----|------------|-----------|------------|
| 1    | N | N1 | 0.0000000  | 0.0000000 | 2.1997659  |
| 2    | C | C4 | 0.0000000  | 0.0000000 | -0.5971539 |
| 3    | C | C2 | 1.1474557  | 0.0000000 | 1.5039004  |
| 4    | C | C6 | -1.1474557 | 0.0000000 | 1.5039004  |
| 5    | C | C5 | -1.2094198 | 0.0000000 | 0.1121569  |
| 6    | C | C3 | 1.2094198  | 0.0000000 | 0.1121569  |
| 7    | H | H2 | 2.0636346  | 0.0000000 | 2.0887390  |
| 8    | H | H6 | -2.0636346 | 0.0000000 | 2.0887390  |
| 9    | H | H5 | -2.1624575 | 0.0000000 | -0.4040951 |
| 10   | H | H3 | 2.1624575  | 0.0000000 | -0.4040951 |
| 11   | C | C1 | 0.0000000  | 0.0000000 | -2.0309621 |
| 12   | N | N2 | 0.0000000  | 0.0000000 | -3.1988059 |

**Cartesian coordinates for geometry minimized 4-cyanopyridine + Cl cation (1f-Cl)**

**at the B3LYP/6-31G\*/SM8 (acetone) level:**

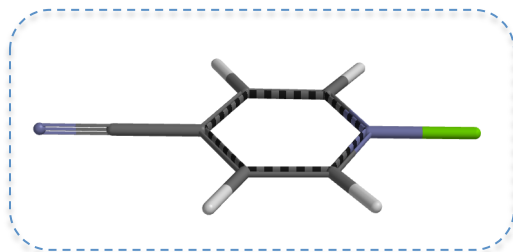

| Atom |        | X          | Y         | Z          |
|------|--------|------------|-----------|------------|
| 1    | N N1   | 0.0000000  | 0.0000000 | 1.2123809  |
| 2    | C C4   | 0.0000000  | 0.0000000 | -1.5124756 |
| 3    | C C2   | 1.1942669  | 0.0000000 | 0.5726390  |
| 4    | C C6   | -1.1942669 | 0.0000000 | 0.5726390  |
| 5    | C C5   | -1.2129175 | 0.0000000 | -0.8096542 |
| 6    | C C3   | 1.2129175  | 0.0000000 | -0.8096542 |
| 7    | H H2   | 2.0911625  | 0.0000000 | 1.1785270  |
| 8    | H H6   | -2.0911625 | 0.0000000 | 1.1785270  |
| 9    | H H5   | -2.1683554 | 0.0000000 | -1.3199379 |
| 10   | H H3   | 2.1683554  | 0.0000000 | -1.3199379 |
| 11   | C C1   | 0.0000000  | 0.0000000 | -2.9430404 |
| 12   | N N2   | 0.0000000  | 0.0000000 | -4.1101481 |
| 13   | Cl C11 | 0.0000000  | 0.0000000 | 2.9496747  |

**Cartesian coordinates for geometry minimized 4-bromopyridine (1g) at the**

**B3LYP/6-31G\*/SM8 (acetone) level:**

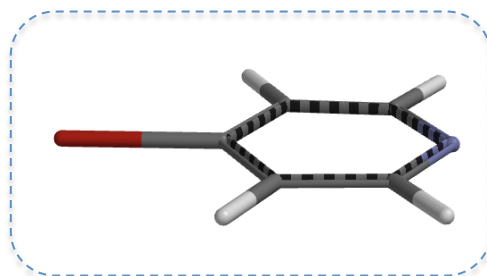

| Atom |      | X          | Y         | Z         |
|------|------|------------|-----------|-----------|
| 1    | N N1 | 0.0000000  | 0.0000000 | 2.9013478 |
| 2    | C C4 | 0.0000000  | 0.0000000 | 0.1105270 |
| 3    | C C2 | 1.1431628  | 0.0000000 | 2.2001341 |
| 4    | C C6 | -1.1431628 | 0.0000000 | 2.2001341 |
| 5    | C C5 | -1.2058464 | 0.0000000 | 0.8057399 |



|    |    |     |            |           |            |
|----|----|-----|------------|-----------|------------|
| 6  | C  | C3  | 1.2058464  | 0.0000000 | 0.8057399  |
| 7  | H  | H2  | 2.0633399  | 0.0000000 | 2.7801079  |
| 8  | H  | H6  | -2.0633399 | 0.0000000 | 2.7801079  |
| 9  | H  | H5  | -2.1618483 | 0.0000000 | 0.2948206  |
| 10 | H  | H3  | 2.1618483  | 0.0000000 | 0.2948206  |
| 11 | Br | Br1 | 0.0000000  | 0.0000000 | -1.8055126 |

**Cartesian coordinates for geometry minimized 4-bromopyridine (1g) at the B3LYP/6-31G\*/SM8 (acetone) level:**

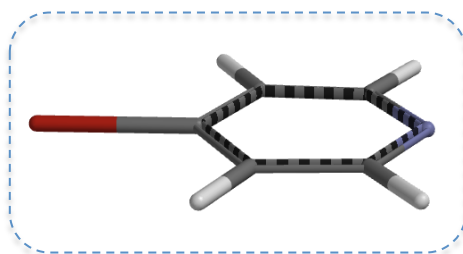

| Atom |    | X   | Y          | Z         |            |
|------|----|-----|------------|-----------|------------|
| 1    | N  | N1  | 0.0000000  | 0.0000000 | 2.9013478  |
| 2    | C  | C4  | 0.0000000  | 0.0000000 | 0.1105270  |
| 3    | C  | C2  | 1.1431628  | 0.0000000 | 2.2001341  |
| 4    | C  | C6  | -1.1431628 | 0.0000000 | 2.2001341  |
| 5    | C  | C5  | -1.2058464 | 0.0000000 | 0.8057399  |
| 6    | C  | C3  | 1.2058464  | 0.0000000 | 0.8057399  |
| 7    | H  | H2  | 2.0633399  | 0.0000000 | 2.7801079  |
| 8    | H  | H6  | -2.0633399 | 0.0000000 | 2.7801079  |
| 9    | H  | H5  | -2.1618483 | 0.0000000 | 0.2948206  |
| 10   | H  | H3  | 2.1618483  | 0.0000000 | 0.2948206  |
| 11   | Br | Br1 | 0.0000000  | 0.0000000 | -1.8055126 |

**Cartesian coordinates for geometry minimized 4-bromopyridine + Cl (1g-Cl) at the B3LYP/6-31G\*/SM8 (acetone) level:**

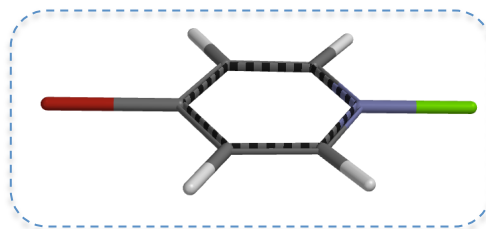

| Atom |   | X  | Y         | Z         |           |
|------|---|----|-----------|-----------|-----------|
| 1    | N | N1 | 0.0000000 | 0.0000000 | 1.9983709 |

|    |    |     |            |           |            |
|----|----|-----|------------|-----------|------------|
| 2  | C  | C4  | 0.0000000  | 0.0000000 | -0.7248359 |
| 3  | C  | C2  | 1.1928102  | 0.0000000 | 1.3536494  |
| 4  | C  | C6  | -1.1928102 | 0.0000000 | 1.3536494  |
| 5  | C  | C5  | -1.2114857 | 0.0000000 | -0.0279470 |
| 6  | C  | C3  | 1.2114857  | 0.0000000 | -0.0279470 |
| 7  | H  | H2  | 2.0911347  | 0.0000000 | 1.9583165  |
| 8  | H  | H6  | -2.0911347 | 0.0000000 | 1.9583165  |
| 9  | H  | H5  | -2.1703071 | 0.0000000 | -0.5326010 |
| 10 | H  | H3  | 2.1703071  | 0.0000000 | -0.5326010 |
| 11 | Cl | Cl1 | 0.0000000  | 0.0000000 | 3.7332668  |
| 12 | Br | Br1 | 0.0000000  | 0.0000000 | -2.6247136 |

**Cartesian coordinates for geometry minimized succinimide anion at the B3LYP/6-**

**31G\*/SM8 (acetone) level:**

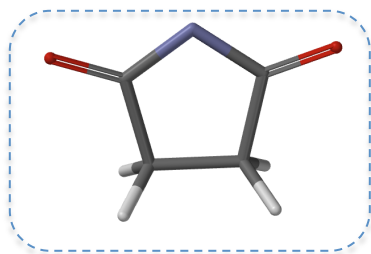

| Atom | X | Y  | Z          |            |            |
|------|---|----|------------|------------|------------|
| 1    | N | N1 | 0.0000000  | -0.0000001 | -1.6430693 |
| 2    | C | C2 | 1.1154878  | 0.0000020  | -0.8517536 |
| 3    | C | C3 | 0.7624587  | -0.0000010 | 0.6543592  |
| 4    | C | C4 | -0.7624590 | 0.0000015  | 0.6543592  |
| 5    | C | C6 | -1.1154881 | -0.0000019 | -0.8517539 |
| 6    | H | H6 | 1.2117654  | -0.8791951 | 1.1310469  |
| 7    | H | H5 | 1.2117711  | 0.8791874  | 1.1310524  |
| 8    | H | H7 | -1.2117663 | 0.8791950  | 1.1310476  |
| 9    | H | H8 | -1.2117695 | -0.8791875 | 1.1310528  |
| 10   | O | O1 | -2.2901120 | -0.0000053 | -1.2431711 |
| 11   | O | O2 | 2.2901119  | 0.0000051  | -1.2431703 |

**Cartesian coordinates for geometry minimized *N*-chlorosuccinimide (NCS) at the**

**B3LYP/6-31G\*/SM8 (acetone) level:**

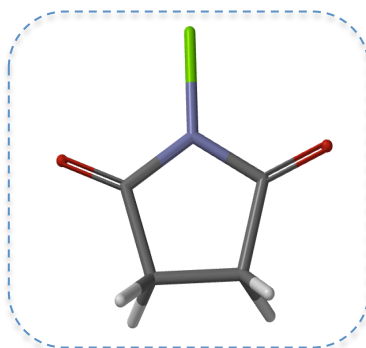

| Atom |        | X          | Y          | Z          |
|------|--------|------------|------------|------------|
| 1    | N N2   | 0.0000000  | 0.0000000  | 0.3164687  |
| 2    | C C2   | 1.1937515  | 0.0000000  | -0.4343312 |
| 3    | C C3   | 0.7701646  | 0.0000000  | -1.8896497 |
| 4    | C C4   | -0.7701646 | 0.0000000  | -1.8896497 |
| 5    | C C6   | -1.1937515 | 0.0000000  | -0.4343312 |
| 6    | H H6   | 1.2017538  | 0.8800770  | -2.3749307 |
| 7    | H H5   | 1.2017538  | -0.8800770 | -2.3749307 |
| 8    | H H7   | -1.2017538 | -0.8800770 | -2.3749307 |
| 9    | H H8   | -1.2017538 | 0.8800770  | -2.3749307 |
| 10   | O O1   | -2.3092282 | 0.0000000  | 0.0392154  |
| 11   | O O2   | 2.3092282  | 0.0000000  | 0.0392154  |
| 12   | Cl Cl1 | 0.0000000  | 0.0000000  | 2.0320450  |

**Cartesian coordinates for geometry minimized phthalimide anion at the B3LYP/6-**

**31G\*/SM8 (acetone) level:**

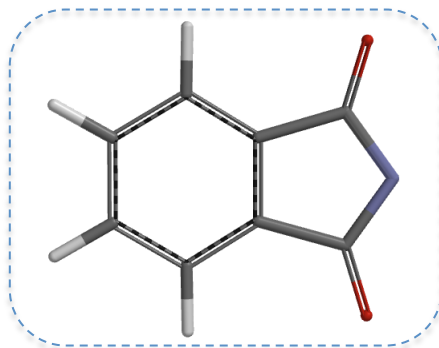

| Atom |      | X          | Y         | Z          |
|------|------|------------|-----------|------------|
| 1    | H H2 | -2.5058428 | 0.0000000 | -1.3072244 |
| 2    | C C1 | -1.4190106 | 0.0000000 | -1.3247221 |
| 3    | C C4 | 1.4190106  | 0.0000000 | -1.3247221 |
| 4    | C C2 | -0.6956424 | 0.0000000 | -0.1410339 |
| 5    | C C6 | -0.6998789 | 0.0000000 | -2.5302383 |
| 6    | C C5 | 0.6998789  | 0.0000000 | -2.5302383 |
| 7    | C C3 | 0.6956424  | 0.0000000 | -0.1410339 |
| 8    | H H6 | -1.2358847 | 0.0000000 | -3.4751863 |
| 9    | H H5 | 1.2358847  | 0.0000000 | -3.4751863 |
| 10   | H H4 | 2.5058428  | 0.0000000 | -1.3072244 |
| 11   | C C9 | 1.1133052  | 0.0000000 | 1.3159163  |
| 12   | O O2 | 2.2969444  | 0.0000000 | 1.6791531  |
| 13   | C C7 | -1.1133052 | 0.0000000 | 1.3159163  |
| 14   | O O3 | -2.2969444 | 0.0000000 | 1.6791531  |
| 15   | N N1 | 0.0000000  | 0.0000000 | 2.1227581  |

**Cartesian coordinates for geometry minimized *N*-chlorophthalimide (NCP) at the B3LYP/6-31G\*/SM8 (acetone) level:**

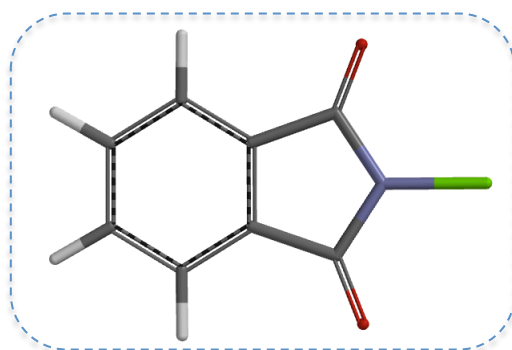

| Atom |        | X          | Y         | Z          |
|------|--------|------------|-----------|------------|
| 1    | H H1   | -2.5094267 | 0.0000000 | -1.9981670 |
| 2    | C C1   | -1.4246386 | 0.0000000 | -2.0071608 |
| 3    | C C4   | 1.4246386  | 0.0000000 | -2.0071608 |
| 4    | C C2   | -0.7003910 | 0.0000000 | -0.8246524 |
| 5    | C C6   | -0.6994171 | 0.0000000 | -3.2067501 |
| 6    | C C5   | 0.6994171  | 0.0000000 | -3.2067501 |
| 7    | C C3   | 0.7003910  | 0.0000000 | -0.8246524 |
| 8    | H H6   | -1.2337089 | 0.0000000 | -4.1513571 |
| 9    | H H5   | 1.2337089  | 0.0000000 | -4.1513571 |
| 10   | H H4   | 2.5094267  | 0.0000000 | -1.9981670 |
| 11   | C C7   | -1.1885780 | 0.0000000 | 0.5794528  |
| 12   | C C8   | 1.1885780  | 0.0000000 | 0.5794528  |
| 13   | N N1   | 0.0000000  | 0.0000000 | 1.3548439  |
| 14   | O O1   | -2.3178198 | 0.0000000 | 1.0194892  |
| 15   | O O2   | 2.3178198  | 0.0000000 | 1.0194892  |
| 16   | Cl C11 | 0.0000000  | 0.0000000 | 3.0595670  |

**Cartesian coordinates for geometry minimized 1-chloro-5,5-dimethylhydantoin**

**anion at the B3LYP/6-31G\*/SM8 (acetone) level:**

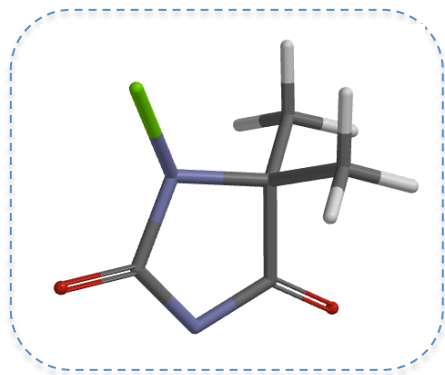

| Atom |        | X          | Y          | Z          |
|------|--------|------------|------------|------------|
| 1    | N N1   | 0.6348933  | 0.0196044  | 0.3935199  |
| 2    | C C2   | -0.6531504 | 0.6392987  | 0.0309234  |
| 3    | C C3   | -1.5052790 | -0.6642301 | -0.0227940 |
| 4    | N N3   | -0.7208693 | -1.7740805 | -0.0182634 |
| 5    | C C7   | 0.5910462  | -1.3817227 | 0.0862221  |
| 6    | O O1   | 1.6019229  | -2.0704046 | 0.0071321  |
| 7    | C1 C12 | 2.1122480  | 0.8730693  | -0.0155140 |
| 8    | O O2   | -2.7385370 | -0.6168048 | -0.0837156 |
| 9    | C C4   | -1.1419147 | 1.5967263  | 1.1165117  |
| 10   | H H5   | -2.1772458 | 1.8873707  | 0.9139982  |
| 11   | H H6   | -0.5224837 | 2.5002971  | 1.1491672  |
| 12   | H H7   | -1.1044665 | 1.1195958  | 2.1019300  |
| 13   | C C5   | -0.6779273 | 1.3096456  | -1.3495440 |
| 14   | H H8   | -1.7126081 | 1.5648848  | -1.5992339 |
| 15   | H H9   | -0.2943829 | 0.6407735  | -2.1284128 |
| 16   | H H10  | -0.0789338 | 2.2256011  | -1.3557543 |

**Cartesian coordinates for geometry minimized 1,3-dichloro-5,5-dimethylhydantoin (DCDMH) at the B3LYP/6-31G\*/SM8 (acetone) level:**

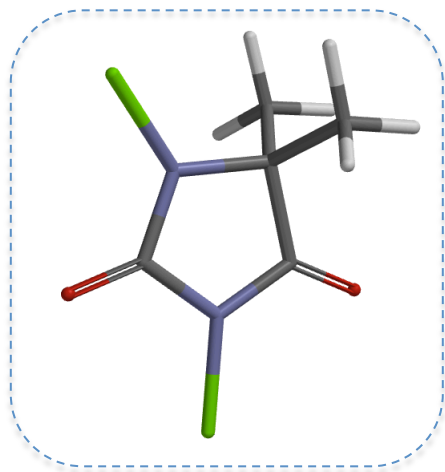

| Atom     | X          | Y          | Z          |
|----------|------------|------------|------------|
| 1 N N1   | 0.9282227  | -0.4666650 | 0.1325938  |
| 2 C C2   | 0.8021885  | 1.0067936  | 0.0069192  |
| 3 C C3   | -0.7369431 | 1.1495839  | -0.0022491 |
| 4 N N3   | -1.2394160 | -0.1435735 | -0.0110006 |
| 5 C C7   | -0.2432908 | -1.1677794 | 0.0380491  |
| 6 O O1   | -0.4438673 | -2.3600104 | 0.0133999  |
| 7 Cl C11 | -2.9051737 | -0.5190372 | -0.0053392 |
| 8 Cl C12 | 2.4338512  | -1.2747265 | -0.0064335 |
| 9 O O2   | -1.3715844 | 2.1802447  | -0.0088350 |
| 10 C C1  | 1.3958776  | 1.7246436  | 1.2215635  |
| 11 H H2  | 1.1803832  | 2.7940166  | 1.1572922  |
| 12 H H1  | 2.4811459  | 1.5890967  | 1.2404434  |
| 13 H H5  | 0.9801868  | 1.3368335  | 2.1559728  |
| 14 C C4  | 1.3704076  | 1.5323056  | -1.3174170 |
| 15 H H4  | 1.1316766  | 2.5941448  | -1.4168392 |
| 16 H H6  | 0.9534980  | 0.9969963  | -2.1756197 |
| 17 H H7  | 2.4581197  | 1.4194055  | -1.3299791 |

**Cartesian coordinates for geometry minimized dichloroisocyanuric acid anion at the B3LYP/6-31G\*/SM8 (acetone) level:**

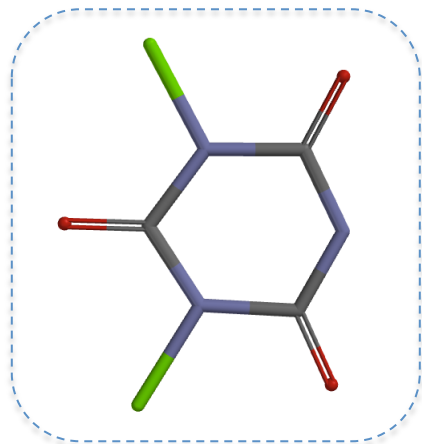

| Atom |        | X          | Y          | Z         |
|------|--------|------------|------------|-----------|
| 1    | N N2   | 1.1975822  | -0.2247672 | 0.0000000 |
| 2    | N N3   | -0.7933257 | 0.9247690  | 0.0000000 |
| 3    | N N1   | -0.8359088 | -1.4478491 | 0.0000000 |
| 4    | C C5   | -1.5565342 | -0.3094036 | 0.0000000 |
| 5    | C C3   | 0.5102035  | -1.5032357 | 0.0000000 |
| 6    | C C1   | 0.5986729  | 1.0367859  | 0.0000000 |
| 7    | O O2   | 1.1895880  | -2.5203278 | 0.0000000 |
| 8    | O O3   | -2.7770002 | -0.2295546 | 0.0000000 |
| 9    | O O4   | 1.2055501  | 2.0885643  | 0.0000000 |
| 10   | Cl C11 | -1.6594540 | 2.4145250  | 0.0000000 |
| 11   | Cl C12 | 2.9206261  | -0.2295063 | 0.0000000 |

**Cartesian coordinates for geometry minimized trichloroisocyanuric acid (TCCA) at the B3LYP/6-31G\*/SM8 (acetone) level:**

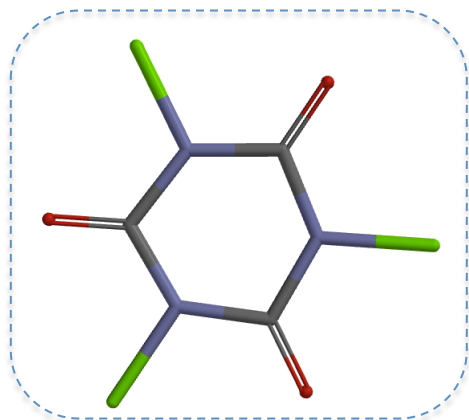

| Atom |        | X          | Y          | Z         |
|------|--------|------------|------------|-----------|
| 1    | N N1   | 1.3469650  | 0.0000000  | 0.0000000 |
| 2    | N N2   | -0.6734825 | 1.1665059  | 0.0000000 |
| 3    | N N4   | -0.6734825 | -1.1665059 | 0.0000000 |
| 4    | C C10  | -1.4589410 | 0.0000000  | 0.0000000 |
| 5    | C C8   | 0.7294705  | -1.2634800 | 0.0000000 |
| 6    | C C7   | 0.7294705  | 1.2634800  | 0.0000000 |
| 7    | O O1   | -2.6624057 | 0.0000000  | 0.0000000 |
| 8    | O O2   | 1.3312028  | 2.3057110  | 0.0000000 |
| 9    | O O3   | 1.3312028  | -2.3057110 | 0.0000000 |
| 10   | Cl C11 | 3.0624432  | 0.0000000  | 0.0000000 |
| 11   | Cl C12 | -1.5312216 | -2.6521536 | 0.0000000 |
| 12   | Cl C13 | -1.5312216 | 2.6521536  | 0.0000000 |

**Cartesian coordinates for geometry minimized N-cinnamyl-N-methylmethanesulfonamide (6):**

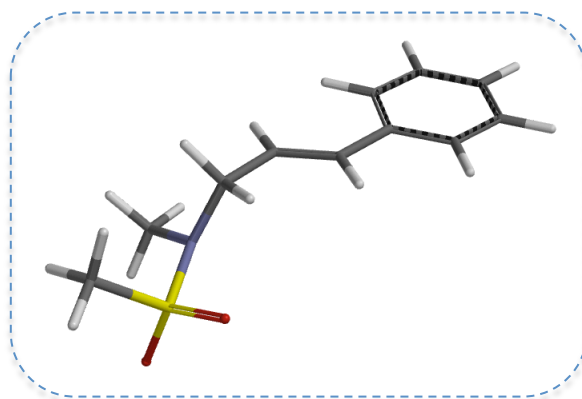

| Atom |      | X          | Y          | Z          |
|------|------|------------|------------|------------|
| 1    | H H1 | -1.0305135 | 2.8665909  | 0.2373861  |
| 2    | C C1 | -0.8216126 | 2.8025379  | 1.3014642  |
| 3    | C C4 | -0.3076293 | 2.6799012  | 4.0400905  |
| 4    | C C2 | -0.5060062 | 1.5598968  | 1.8819111  |
| 5    | C C6 | -0.8759614 | 3.9582720  | 2.0742966  |
| 6    | C C5 | -0.6187115 | 3.9037641  | 3.4477374  |
| 7    | C C3 | -0.2538330 | 1.5229252  | 3.2643776  |
| 8    | H H6 | -1.1218425 | 4.9072444  | 1.6048414  |
| 9    | H H5 | -0.6626065 | 4.8082310  | 4.0483011  |
| 10   | H H3 | -0.0090709 | 0.5717361  | 3.7314987  |
| 11   | H H4 | -0.1065007 | 2.6241747  | 5.1065983  |
| 12   | C C7 | -0.4305058 | 0.3056322  | 1.1187739  |
| 13   | H H7 | -0.2254035 | -0.5807294 | 1.7203402  |
| 14   | C C8 | -0.5762908 | 0.1369422  | -0.2039278 |
| 15   | H H8 | -0.7743776 | 0.9896481  | -0.8511283 |
| 16   | C C9 | -0.4950434 | -1.2136049 | -0.8658559 |
| 17   | H H2 | -0.5170834 | -1.9941192 | -0.1038638 |



|    |   |     |            |            |            |
|----|---|-----|------------|------------|------------|
| 18 | H | H10 | -1.3644980 | -1.3539295 | -1.5328648 |
| 19 | N | N1  | 0.7563342  | -1.3892418 | -1.6368630 |
| 20 | C | C10 | 0.9018922  | -0.5593772 | -2.8327703 |
| 21 | H | H11 | 0.9017556  | 0.4918211  | -2.5302416 |
| 22 | H | H12 | 0.0848355  | -0.7145453 | -3.5569053 |
| 23 | H | H13 | 1.8594506  | -0.7765114 | -3.3065348 |
| 24 | S | S1  | 1.4128934  | -2.9387134 | -1.6955576 |
| 25 | O | O1  | 2.7100099  | -2.8249876 | -2.3644222 |
| 26 | O | O2  | 1.2886646  | -3.5048913 | -0.3509694 |
| 27 | C | C11 | 0.3433312  | -3.9201843 | -2.7816173 |
| 28 | H | H9  | 0.3550429  | -3.4891433 | -3.7850057 |
| 29 | H | H16 | -0.6699297 | -3.9368942 | -2.3741136 |
| 30 | H | H17 | 0.7532105  | -4.9324449 | -2.8049756 |

**Cartesian coordinates for geometry minimized *N*-cinnamyl-*N*-methylmethanesulfonamide + Cl cation (6-Cl):**

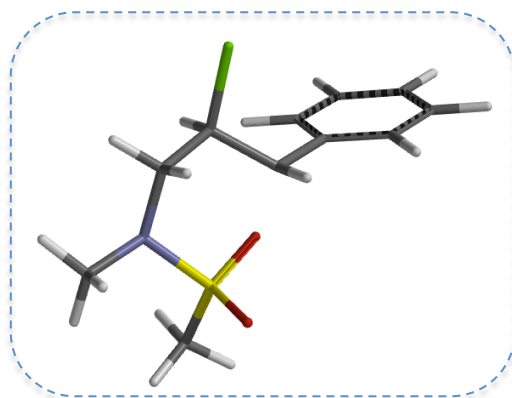

| Atom | X | Y         | Z         |           |
|------|---|-----------|-----------|-----------|
| 1    | H | 1.696809  | 0.089600  | 2.023526  |
| 2    | C | 2.332408  | 0.307593  | 1.169557  |
| 3    | C | 3.992070  | 0.892344  | -1.004801 |
| 4    | C | 1.830245  | 0.221613  | -0.138968 |
| 5    | C | 3.655330  | 0.682201  | 1.384550  |
| 6    | C | 4.486524  | 0.971503  | 0.298089  |
| 7    | C | 2.665650  | 0.525013  | -1.223308 |
| 8    | H | 4.040476  | 0.745197  | 2.397573  |
| 9    | H | 5.519885  | 1.258081  | 0.469166  |
| 10   | H | 2.281007  | 0.464077  | -2.238175 |
| 11   | H | 4.636648  | 1.116080  | -1.849071 |
| 12   | C | 0.421433  | -0.175635 | -0.410150 |
| 13   | H | 0.231330  | -0.268935 | -1.481678 |
| 14   | C | -0.162246 | -1.365370 | 0.353177  |
| 15   | C | -1.658009 | -1.566799 | 0.082392  |
| 16   | H | -1.830369 | -1.801693 | -0.976270 |
| 17   | H | -2.021154 | -2.406688 | 0.678479  |
| 18   | N | -2.475689 | -0.389740 | 0.515604  |
| 19   | C | -3.939658 | -0.642526 | 0.438464  |

|    |    |           |           |           |
|----|----|-----------|-----------|-----------|
| 20 | H  | -4.145502 | -1.492016 | 1.092740  |
| 21 | H  | -4.269933 | -0.869694 | -0.580995 |
| 22 | H  | -4.490244 | 0.218070  | 0.824109  |
| 23 | S  | -1.995354 | 1.025254  | -0.224353 |
| 24 | O  | -0.443645 | 1.037550  | 0.052619  |
| 25 | O  | -2.399642 | 1.206475  | -1.611533 |
| 26 | C  | -2.533132 | 2.369410  | 0.830075  |
| 27 | H  | -2.248587 | 2.146117  | 1.858739  |
| 28 | H  | -3.613001 | 2.481820  | 0.714358  |
| 29 | H  | -2.021382 | 3.260346  | 0.456301  |
| 30 | Cl | 0.687011  | -2.860690 | -0.178562 |
| 31 | H  | 0.012926  | -1.252804 | 1.424025  |

**Cartesian coordinates for geometry minimized *N*-(4-methoxyphenyl)-*N*-methylmethanesulfonamide (7):**

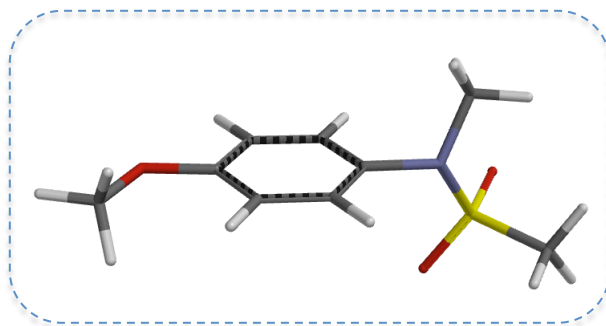

| Atom |       | X          | Y          | Z          |
|------|-------|------------|------------|------------|
| 1    | H H1  | -0.8280239 | 0.7464126  | -1.6579833 |
| 2    | C C1  | -0.5385586 | 0.8203226  | -0.6141097 |
| 3    | C C4  | 0.2194106  | 0.9770287  | 2.0610019  |
| 4    | C C2  | -0.1258567 | -0.3300109 | 0.0536762  |
| 5    | C C6  | -0.5839693 | 2.0532117  | 0.0407250  |
| 6    | C C5  | -0.2037210 | 2.1333012  | 1.3857781  |
| 7    | C C3  | 0.2561821  | -0.2422025 | 1.4006387  |
| 8    | H H3  | 0.5951375  | -1.1321139 | 1.9236242  |
| 9    | H H4  | 0.5187042  | 1.0646910  | 3.1005799  |
| 10   | N N1  | -0.1399570 | -1.5884436 | -0.6547433 |
| 11   | S S1  | 1.4026110  | -2.2684655 | -0.9778075 |
| 12   | C C8  | -1.1403989 | -2.5640997 | -0.1868703 |
| 13   | H H2  | -0.9272789 | -2.9506061 | 0.8170278  |
| 14   | H H12 | -1.1874974 | -3.4098397 | -0.8787659 |
| 15   | H H13 | -2.1119680 | -2.0640287 | -0.1865897 |
| 16   | O O2  | 1.6165569  | -3.4481067 | -0.1276428 |
| 17   | O O3  | 2.3706445  | -1.1724327 | -0.9986819 |
| 18   | C C9  | 1.1818779  | -2.8512269 | -2.6716374 |
| 19   | H H11 | 0.3468644  | -3.5529778 | -2.7153607 |
| 20   | H H14 | 2.1084281  | -3.3572086 | -2.9529498 |
| 21   | H H15 | 1.0026214  | -1.9882426 | -3.3137483 |
| 22   | H H9  | -0.9097852 | 2.9325063  | -0.5026876 |

|    |   |    |            |           |           |
|----|---|----|------------|-----------|-----------|
| 23 | O | O1 | -0.2093649 | 3.2782563 | 2.1253293 |
| 24 | C | C7 | -0.6037831 | 4.4855130 | 1.4921983 |
| 25 | H | H5 | 0.0569512  | 4.7336275 | 0.6512875 |
| 26 | H | H6 | -0.5255599 | 5.2625426 | 2.2545830 |
| 27 | H | H7 | -1.6402669 | 4.4325923 | 1.1331282 |

**Cartesian coordinates for geometry minimized *N*-(4-methoxyphenyl)-*N*-methylmethanesulfonamide + Cl cation (7-Cl-1):**

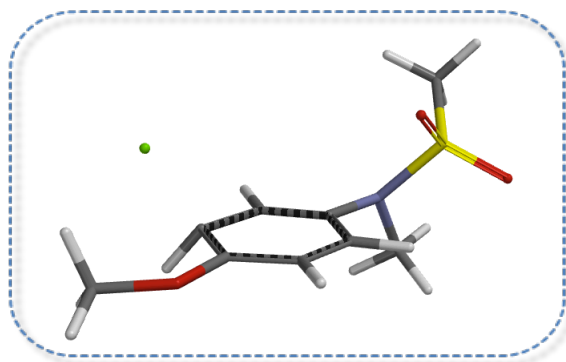

| Atom |    | X   | Y          | Z          |            |
|------|----|-----|------------|------------|------------|
| 1    | H  | H1  | -1.1679408 | 0.5393404  | -1.6202229 |
| 2    | C  | C1  | -0.7071932 | 0.6233359  | -0.6415009 |
| 3    | C  | C4  | 0.5938769  | 0.9454410  | 1.8844954  |
| 4    | C  | C2  | -0.1605279 | -0.4538131 | -0.0349923 |
| 5    | C  | C6  | -0.6757176 | 1.9887666  | -0.0350380 |
| 6    | C  | C5  | 0.0082726  | 2.0832961  | 1.3096646  |
| 7    | C  | C3  | 0.4923162  | -0.2733502 | 1.2515724  |
| 8    | H  | H3  | 0.9038626  | -1.1467847 | 1.7464521  |
| 9    | H  | H4  | 1.0860336  | 1.0455490  | 2.8458153  |
| 10   | N  | N1  | -0.2327809 | -1.7339681 | -0.6523380 |
| 11   | S  | S1  | 1.2837435  | -2.5734204 | -0.7285060 |
| 12   | C  | C8  | -1.4212535 | -2.5671320 | -0.3583811 |
| 13   | H  | H2  | -1.4486017 | -2.9095966 | 0.6821118  |
| 14   | H  | H12 | -1.4129427 | -3.4419995 | -1.0106684 |
| 15   | H  | H13 | -2.3161982 | -1.9823760 | -0.5824029 |
| 16   | O  | O2  | 1.1695434  | -3.8118467 | 0.0372507  |
| 17   | O  | O3  | 2.2815977  | -1.5497212 | -0.3886037 |
| 18   | C  | C9  | 1.4185300  | -2.9705831 | -2.4755154 |
| 19   | H  | H11 | 0.5695161  | -3.5913106 | -2.7678497 |
| 20   | H  | H14 | 2.3499476  | -3.5302390 | -2.5933903 |
| 21   | H  | H15 | 1.4500789  | -2.0411476 | -3.0452141 |
| 22   | H  | H9  | -1.6969950 | 2.3825780  | 0.0524142  |
| 23   | O  | O1  | 0.0497280  | 3.1756452  | 2.0069334  |
| 24   | C  | C7  | -0.5504572 | 4.4498204  | 1.6323065  |
| 25   | H  | H5  | 0.1334203  | 4.9750858  | 0.9663904  |
| 26   | H  | H6  | -0.6623669 | 4.9808296  | 2.5756889  |
| 27   | H  | H7  | -1.5216109 | 4.2987124  | 1.1561738  |
| 28   | Cl | Cl1 | 0.1841190  | 3.0888881  | -1.2126455 |

**Cartesian coordinates for geometry minimized *N*-(4-methoxyphenyl)-*N*-methylmethanesulfonamide + Cl cation (7-Cl-2):**

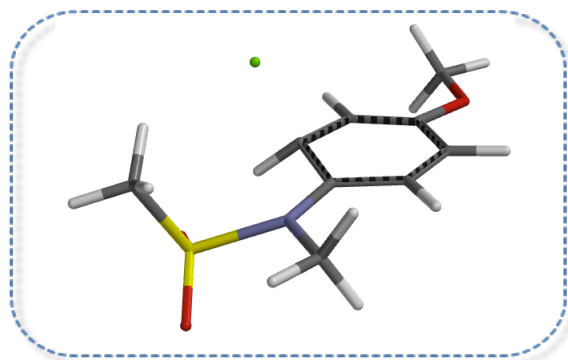

| Atom |        | X          | Y          | Z          |
|------|--------|------------|------------|------------|
| 1    | H H1   | 0.7545233  | 0.5200014  | -1.4597529 |
| 2    | C C1   | -0.0171488 | 0.6432198  | -0.7030059 |
| 3    | C C4   | -0.2950814 | 1.2157281  | 2.0530766  |
| 4    | C C2   | 0.0577609  | -0.4652841 | 0.3395080  |
| 5    | C C6   | -0.0488950 | 2.0403395  | -0.2017802 |
| 6    | C C5   | -0.1979156 | 2.3151498  | 1.1178931  |
| 7    | C C3   | -0.1857158 | -0.0996765 | 1.6977841  |
| 8    | H H3   | -0.2395970 | -0.8544463 | 2.4698079  |
| 9    | H H4   | -0.4455950 | 1.4789221  | 3.0969806  |
| 10   | N N1   | 0.2818921  | -1.7366073 | 0.0086877  |
| 11   | S S1   | 1.0417889  | -2.3347658 | -1.5918841 |
| 12   | C C8   | 0.1865904  | -2.8096704 | 1.0275572  |
| 13   | H H2   | 0.9900449  | -2.7123523 | 1.7627925  |
| 14   | H H12  | 0.2946411  | -3.7766796 | 0.5418474  |
| 15   | H H13  | -0.7893717 | -2.7567642 | 1.5143265  |
| 16   | O O2   | 1.9001411  | -3.4131185 | -1.1385160 |
| 17   | O O3   | 1.5596151  | -1.1591264 | -2.2712309 |
| 18   | C C9   | -0.3869241 | -2.9984357 | -2.4562879 |
| 19   | H H11  | -0.8553384 | -3.7604173 | -1.8312377 |
| 20   | H H14  | 0.0140180  | -3.4519453 | -3.3680495 |
| 21   | H H15  | -1.0684675 | -2.1809029 | -2.6904622 |
| 22   | H H9   | 0.0142887  | 2.8116955  | -0.9591045 |
| 23   | O O1   | -0.2622823 | 3.5162128  | 1.7088567  |
| 24   | C C7   | -0.1872241 | 4.6844471  | 0.8791927  |
| 25   | H H5   | 0.7691045  | 4.7145086  | 0.3449722  |
| 26   | H H6   | -0.2587461 | 5.5313609  | 1.5600164  |
| 27   | H H7   | -1.0198338 | 4.7053353  | 0.1672088  |
| 28   | Cl Cl1 | -1.6062723 | 0.3332715  | -1.6191967 |

**Cartesian coordinates for geometry minimized *N*-methyl-*N*-(3,4,5-trimethoxyphenyl)methanesulfonamide:**

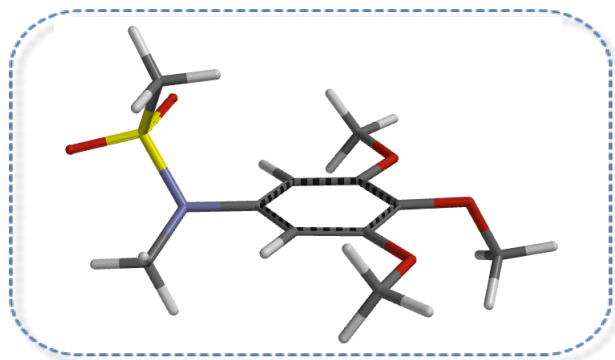

| Atom |       | X          | Y          | Z          |
|------|-------|------------|------------|------------|
| 1    | C C1  | -1.0309926 | -0.1353219 | 1.3399131  |
| 2    | C C4  | 1.2672646  | -0.2438739 | -0.2635019 |
| 3    | C C2  | 0.2375798  | -0.1321330 | 1.9427107  |
| 4    | C C6  | -1.1547915 | -0.1516611 | -0.0556783 |
| 5    | C C5  | -0.0017465 | -0.2103991 | -0.8502877 |
| 6    | C C3  | 1.3836172  | -0.1881716 | 1.1293493  |
| 7    | H H6  | -2.1333625 | -0.1301962 | -0.5156833 |
| 8    | O O1  | -2.0863011 | -0.1074981 | 2.2031059  |
| 9    | C C7  | -3.3959952 | -0.0835119 | 1.6622379  |
| 10   | H H5  | -3.5647534 | 0.8124029  | 1.0494296  |
| 11   | H H8  | -4.0714074 | -0.0639328 | 2.5194953  |
| 12   | H H9  | -3.6033941 | -0.9772719 | 1.0579932  |
| 13   | O O2  | 0.3476819  | -0.0293952 | 3.3049787  |
| 14   | C C8  | 0.5303604  | -1.2732688 | 3.9835550  |
| 15   | H H3  | -0.3256224 | -1.9401431 | 3.8189956  |
| 16   | H H4  | 0.6017975  | -1.0324363 | 5.0469483  |
| 17   | H H7  | 1.4531692  | -1.7686339 | 3.6598364  |
| 18   | H H12 | 2.1360535  | -0.3046660 | -0.9015499 |
| 19   | O O3  | 2.5705937  | -0.2044372 | 1.7957345  |
| 20   | C C9  | 3.7687652  | -0.2124201 | 1.0303176  |
| 21   | H H1  | 3.8605057  | -1.1293497 | 0.4338031  |
| 22   | H H10 | 4.5825460  | -0.1705282 | 1.7563869  |
| 23   | H H11 | 3.8254452  | 0.6572571  | 0.3645174  |
| 24   | N N1  | -0.1141312 | -0.2770905 | -2.2810391 |
| 25   | C C10 | -1.2980093 | -0.9250009 | -2.8606351 |
| 26   | H H2  | -1.1011638 | -1.1416912 | -3.9093918 |
| 27   | H H14 | -2.2127137 | -0.3170400 | -2.7910372 |
| 28   | H H15 | -1.4578432 | -1.8614691 | -2.3210899 |
| 29   | S S1  | 0.5770077  | 0.9726944  | -3.2100336 |
| 30   | O O4  | 0.2609094  | 0.6636564  | -4.6058365 |
| 31   | O O5  | 1.9615227  | 1.1592723  | -2.7768471 |
| 32   | C C11 | -0.3295774 | 2.4691429  | -2.7488351 |
| 33   | H H16 | 0.1200532  | 3.2962346  | -3.3025786 |
| 34   | H H18 | -0.2250918 | 2.6290482  | -1.6742912 |
| 35   | H H19 | -1.3779757 | 2.3518328  | -3.0309924 |

**Cartesian coordinates for geometry minimized *N*-methyl-*N*-(3,4,5-trimethoxyphenyl)methanesulfonamide + Cl cation:**

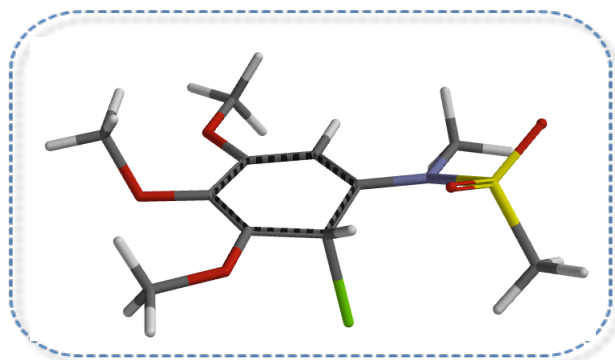

|    | Atom | X         | Y         | Z         |
|----|------|-----------|-----------|-----------|
| 1  | C    | -0.138405 | 1.082979  | 1.305737  |
| 2  | C    | -0.340888 | -1.137890 | -0.432317 |
| 3  | C    | -0.233881 | -0.220594 | 1.906811  |
| 4  | C    | -0.003333 | 1.300556  | -0.086200 |
| 5  | C    | -0.006754 | 0.239999  | -0.971432 |
| 6  | C    | -0.312871 | -1.304612 | 1.067177  |
| 7  | H    | 0.169988  | 2.306836  | -0.435328 |
| 8  | O    | -0.136328 | 2.066960  | 2.181463  |
| 9  | C    | -0.076789 | 3.451629  | 1.775274  |
| 10 | H    | 0.877992  | 3.664001  | 1.286200  |
| 11 | H    | -0.154226 | 4.017311  | 2.702239  |
| 12 | H    | -0.916787 | 3.690375  | 1.117889  |
| 13 | O    | -0.326434 | -0.333941 | 3.261283  |
| 14 | C    | 0.888728  | -0.121459 | 4.010964  |
| 15 | H    | 1.648936  | -0.859964 | 3.730307  |
| 16 | H    | 0.612188  | -0.253388 | 5.057248  |
| 17 | H    | 1.275079  | 0.889413  | 3.858424  |
| 18 | O    | -0.406258 | -2.584299 | 1.370218  |
| 19 | C    | -0.616412 | -3.090793 | 2.713036  |
| 20 | H    | 0.274392  | -2.928774 | 3.322122  |
| 21 | H    | -0.786580 | -4.156939 | 2.569003  |
| 22 | H    | -1.485142 | -2.615119 | 3.166789  |
| 23 | N    | 0.156790  | 0.426542  | -2.312556 |
| 24 | C    | 0.165627  | 1.799552  | -2.854713 |
| 25 | H    | 0.130623  | 1.759667  | -3.941817 |
| 26 | H    | 1.074295  | 2.338836  | -2.567688 |
| 27 | H    | -0.721019 | 2.323165  | -2.489781 |
| 28 | S    | 0.883255  | -0.790652 | -3.424970 |
| 29 | O    | 1.363667  | -1.889502 | -2.595545 |
| 30 | O    | 1.780538  | -0.009760 | -4.260439 |
| 31 | C    | -0.530337 | -1.326943 | -4.396542 |
| 32 | H    | -0.133603 | -2.033737 | -5.130623 |
| 33 | H    | -0.961701 | -0.461553 | -4.902453 |
| 34 | H    | -1.252046 | -1.809942 | -3.737307 |
| 35 | Cl   | -2.048707 | -1.519402 | -0.986314 |
| 36 | H    | 0.286395  | -1.908558 | -0.876161 |

Cartesian coordinates for geometry minimized *N*-cinnamyl-*N*-(2-phenylallyl)methanesulfonamide (9):

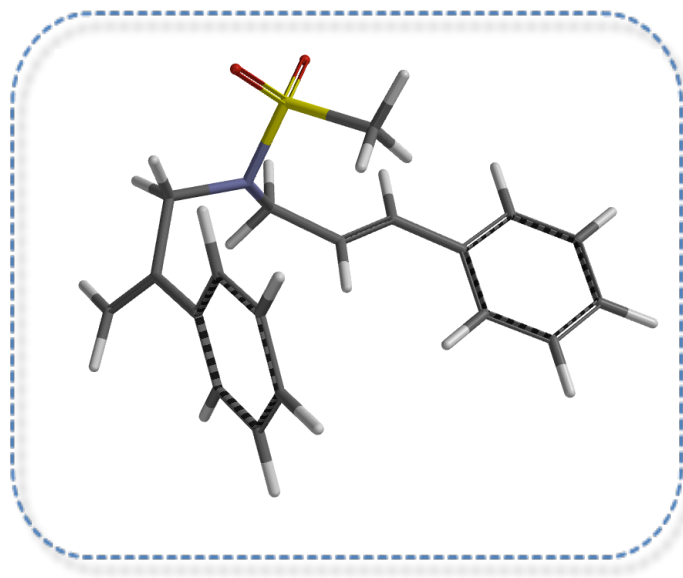

|    | Atom | X         | Y         | Z         |
|----|------|-----------|-----------|-----------|
| 1  | H    | -3.566164 | -1.288921 | 0.001150  |
| 2  | C    | -3.086618 | -1.326162 | -0.972973 |
| 3  | C    | -1.823591 | -1.353055 | -3.451814 |
| 4  | C    | -1.937901 | -2.118310 | -1.141664 |
| 5  | C    | -3.602261 | -0.570975 | -2.025066 |
| 6  | C    | -2.974204 | -0.583002 | -3.271561 |
| 7  | C    | -1.306663 | -2.107323 | -2.398482 |
| 8  | H    | -4.490656 | 0.035172  | -1.867224 |
| 9  | H    | -3.372990 | 0.007050  | -4.092311 |
| 10 | H    | -0.411133 | -2.699010 | -2.563266 |
| 11 | H    | -1.326074 | -1.371414 | -4.418072 |
| 12 | C    | -1.415929 | -2.944957 | -0.020240 |
| 13 | C    | -2.227222 | -3.513929 | 0.885049  |
| 14 | H    | -1.830236 | -4.094874 | 1.713473  |
| 15 | H    | -3.308773 | -3.446626 | 0.815148  |
| 16 | C    | 0.082527  | -3.161655 | 0.076511  |
| 17 | H    | 0.304048  | -3.798152 | 0.944391  |
| 18 | H    | 0.459573  | -3.686248 | -0.803156 |
| 19 | N    | 0.809548  | -1.879215 | 0.170155  |
| 20 | S    | 2.285718  | -1.758489 | -0.665970 |
| 21 | C    | 2.104954  | -0.236950 | -1.614194 |
| 22 | H    | 1.969792  | 0.596333  | -0.924302 |
| 23 | H    | 1.245919  | -0.342398 | -2.277913 |
| 24 | H    | 3.028173  | -0.118284 | -2.186659 |
| 25 | O    | 3.384012  | -1.560137 | 0.288852  |
| 26 | O    | 2.326176  | -2.868048 | -1.628568 |
| 27 | C    | 0.747034  | -1.189784 | 1.481361  |
| 28 | H    | 1.641703  | -1.405607 | 2.077861  |

|    |   |           |           |          |
|----|---|-----------|-----------|----------|
| 29 | H | -0.114754 | -1.631545 | 1.995444 |
| 30 | C | 0.534340  | 0.292513  | 1.352996 |
| 31 | H | -0.358485 | 0.586037  | 0.802006 |
| 32 | C | 1.366034  | 1.209648  | 1.871360 |
| 33 | H | 2.260836  | 0.849856  | 2.380749 |
| 34 | C | 1.231407  | 2.673482  | 1.816384 |
| 35 | C | 1.089923  | 5.489955  | 1.730388 |
| 36 | C | 2.293879  | 3.468520  | 2.280515 |
| 37 | C | 0.088644  | 3.325155  | 1.315493 |
| 38 | C | 0.021047  | 4.714377  | 1.271066 |
| 39 | C | 2.226977  | 4.860312  | 2.237305 |
| 40 | H | 3.183920  | 2.983041  | 2.674337 |
| 41 | H | -0.757536 | 2.740971  | 0.965341 |
| 42 | H | -0.871490 | 5.196276  | 0.880396 |
| 43 | H | 3.063473  | 5.451864  | 2.599836 |
| 44 | H | 1.033023  | 6.574508  | 1.695870 |

**Cartesian coordinates for geometry minimized *N*-cinnamyl-*N*-(2-phenylallyl)methanesulfonamide + Cl cation (11):**

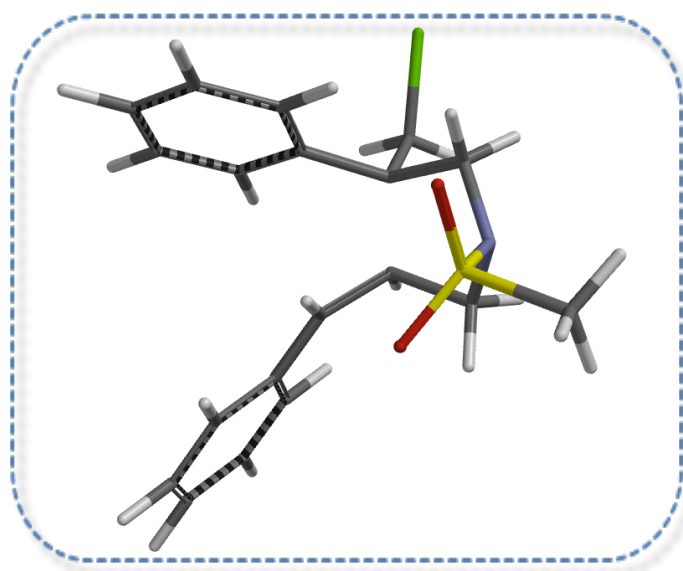

| Atom |      | X          | Y          | Z         |
|------|------|------------|------------|-----------|
| 1    | H H1 | 0.4549913  | 2.0183789  | 1.7077815 |
| 2    | C C1 | 0.5066882  | 1.0313050  | 2.1604949 |
| 3    | C C4 | 0.6975914  | -1.4359402 | 3.4106276 |
| 4    | C C2 | 1.1993595  | -0.0113499 | 1.5084218 |
| 5    | C C6 | -0.0786043 | 0.8433627  | 3.4143703 |
| 6    | C C5 | 0.0158508  | -0.3955723 | 4.0451046 |
| 7    | C C3 | 1.2847970  | -1.2487676 | 2.1561092 |
| 8    | H H6 | -0.5923547 | 1.6691832  | 3.8978753 |
| 9    | H H5 | -0.4308388 | -0.5502060 | 5.0225903 |
| 10   | H H3 | 1.7824480  | -2.0921076 | 1.6947347 |
| 11   | H H4 | 0.7759200  | -2.4067240 | 3.8910208 |



|    |    |     |            |            |            |
|----|----|-----|------------|------------|------------|
| 12 | C  | C7  | 1.7851769  | 0.2794130  | 0.1099132  |
| 13 | C  | C8  | 2.8139646  | 1.4281692  | 0.1885687  |
| 14 | C  | C9  | 2.4345817  | -0.9373404 | -0.6425019 |
| 15 | H  | H2  | 3.3671011  | -0.6085093 | -1.1123530 |
| 16 | H  | H10 | 2.6765158  | -1.7876940 | -0.0128273 |
| 17 | N  | N1  | 1.5130468  | -1.3435279 | -1.7137435 |
| 18 | C  | C10 | 0.8269234  | -0.1459969 | -2.1619329 |
| 19 | H  | H12 | -0.0960951 | -0.3784577 | -2.6949177 |
| 20 | H  | H13 | 1.4837303  | 0.4176882  | -2.8350368 |
| 21 | S  | S1  | 0.5769296  | -2.7702330 | -1.4858747 |
| 22 | O  | O1  | 1.1976880  | -3.5179864 | -0.3930321 |
| 23 | O  | O2  | -0.8447235 | -2.3823087 | -1.4216509 |
| 24 | C  | C11 | 0.8465008  | -3.6522302 | -3.0259219 |
| 25 | H  | H9  | 1.9115313  | -3.8709640 | -3.1142946 |
| 26 | H  | H16 | 0.4989974  | -3.0365016 | -3.8574062 |
| 27 | H  | H17 | 0.2646101  | -4.5753398 | -2.9670175 |
| 28 | C1 | C11 | 4.2727823  | 0.9555377  | 1.1415987  |
| 29 | H  | H7  | 3.1647131  | 1.7030058  | -0.8104295 |
| 30 | H  | H8  | 2.3999105  | 2.3137482  | 0.6722100  |
| 31 | C  | C12 | 0.6120050  | 0.7374592  | -0.8630435 |
| 32 | C  | C13 | -0.7222052 | 0.4169234  | -0.3143275 |
| 33 | C  | C14 | -1.8931821 | 1.1946979  | -0.3583255 |
| 34 | C  | C15 | -4.3173697 | 2.5869618  | -0.4463631 |
| 35 | C  | C16 | -3.1117917 | 0.5640554  | 0.0392914  |
| 36 | C  | C17 | -1.9296688 | 2.5524898  | -0.7973009 |
| 37 | C  | C18 | -3.1308509 | 3.2333717  | -0.8384861 |
| 38 | C  | C19 | -4.3094075 | 1.2550129  | -0.0094144 |
| 39 | H  | H11 | -3.0830762 | -0.4712906 | 0.3664428  |
| 40 | H  | H18 | -1.0151519 | 3.0569078  | -1.0910547 |
| 41 | H  | H19 | -3.1635573 | 4.2663023  | -1.1693814 |
| 42 | H  | H20 | -5.2349387 | 0.7720893  | 0.2859926  |
| 43 | H  | H21 | -5.2563291 | 3.1322903  | -0.4824387 |
| 44 | H  | H14 | 0.6980765  | 1.7942684  | -1.1269414 |
| 45 | H  | H15 | -0.8522859 | -0.6035739 | 0.0328690  |

**Cartesian coordinates for geometry minimized *N*-cinnamyl-*N*-(2-phenylallyl)methanesulfonamide + Cl cation (11'):**

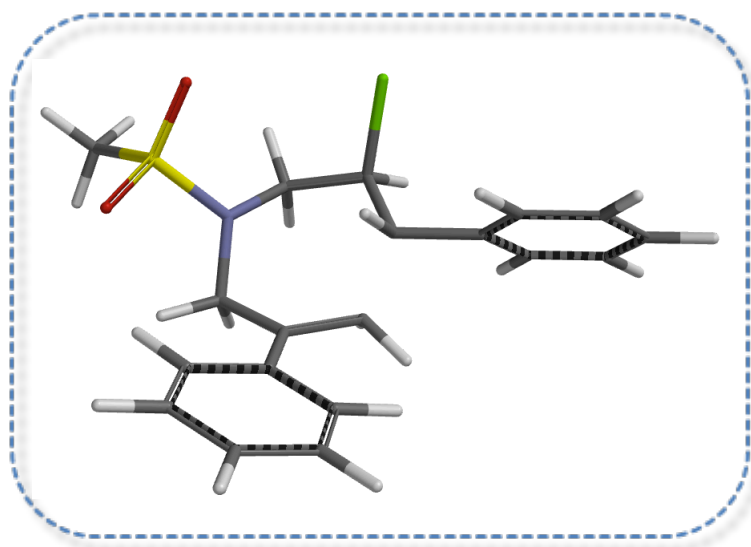

| Atom |    | X   | Y          | Z          |            |
|------|----|-----|------------|------------|------------|
| 1    | H  | H1  | -3.2829057 | -1.2992582 | 1.4088336  |
| 2    | C  | C1  | -3.1287234 | -0.3289719 | 1.8773291  |
| 3    | C  | C4  | -2.7785524 | 2.1528531  | 3.1025715  |
| 4    | C  | C2  | -1.8923738 | 0.3259241  | 1.7693848  |
| 5    | C  | C6  | -4.1749707 | 0.2482735  | 2.5937201  |
| 6    | C  | C5  | -4.0023543 | 1.4919498  | 3.2084540  |
| 7    | C  | C3  | -1.7317067 | 1.5755984  | 2.3822455  |
| 8    | H  | H6  | -5.1239514 | -0.2734148 | 2.6760318  |
| 9    | H  | H5  | -4.8178121 | 1.9395918  | 3.7686355  |
| 10   | H  | H3  | -0.7748707 | 2.0877958  | 2.3175731  |
| 11   | H  | H4  | -2.6333389 | 3.1150808  | 3.5848418  |
| 12   | C  | C7  | -0.7417111 | -0.2802080 | 0.9891320  |
| 13   | C  | C8  | -0.2601987 | -1.6293813 | 1.5575898  |
| 14   | C  | C9  | 0.6602368  | -2.4782880 | 0.6392513  |
| 15   | H  | H2  | 1.3005567  | -3.0881135 | 1.2791047  |
| 16   | H  | H10 | 0.0261732  | -3.1684705 | 0.0640496  |
| 17   | N  | N1  | 1.4870992  | -1.7366961 | -0.3134464 |
| 18   | C  | C10 | 0.9089934  | -1.3860597 | -1.6110930 |
| 19   | H  | H12 | 0.2885380  | -2.2112378 | -1.9902566 |
| 20   | H  | H13 | 1.7032570  | -1.2086742 | -2.3301670 |
| 21   | S  | S1  | 3.1875234  | -1.6542560 | -0.1189567 |
| 22   | O  | O1  | 3.6323624  | -0.7031560 | -1.1422493 |
| 23   | O  | O2  | 3.4375913  | -1.4547759 | 1.2995091  |
| 24   | C  | C11 | 3.8006000  | -3.2879854 | -0.5819418 |
| 25   | H  | H9  | 3.5274466  | -3.4943721 | -1.6184087 |
| 26   | H  | H16 | 3.3884834  | -4.0361355 | 0.0976473  |
| 27   | H  | H17 | 4.8879798  | -3.2509778 | -0.4779862 |
| 28   | Cl | Cl1 | 0.5478180  | -1.3038265 | 3.1501563  |
| 29   | H  | H8  | -1.1241145 | -2.2515945 | 1.8055946  |

|    |   |     |            |            |            |
|----|---|-----|------------|------------|------------|
| 30 | C | C12 | 0.0226030  | -0.1709775 | -1.4061625 |
| 31 | C | C13 | -1.1648650 | -0.4211315 | -0.5586246 |
| 32 | C | C14 | 0.3592331  | 1.1164985  | -1.8903380 |
| 33 | C | C15 | 1.0165054  | 3.6771755  | -2.8664472 |
| 34 | C | C16 | -0.5651384 | 2.2097330  | -1.7909891 |
| 35 | C | C17 | 1.6359519  | 1.3764363  | -2.4898543 |
| 36 | C | C18 | 1.9509414  | 2.6376679  | -2.9623704 |
| 37 | C | C19 | -0.2398920 | 3.4598021  | -2.2768567 |
| 38 | H | H14 | -1.5440470 | 2.0644575  | -1.3516639 |
| 39 | H | H18 | 2.3983170  | 0.6083964  | -2.5087901 |
| 40 | H | H19 | 2.9283056  | 2.8222721  | -3.3957091 |
| 41 | H | H20 | -0.9554010 | 4.2725332  | -2.2072737 |
| 42 | H | H21 | 1.2676636  | 4.6637969  | -3.2456570 |
| 43 | H | H15 | -1.5636142 | -1.4257587 | -0.7305025 |
| 44 | H | H11 | -1.9684687 | 0.2874998  | -0.7407650 |
| 45 | H | H7  | 0.1048300  | 0.4103848  | 1.0348538  |

## VI. NMR spectra

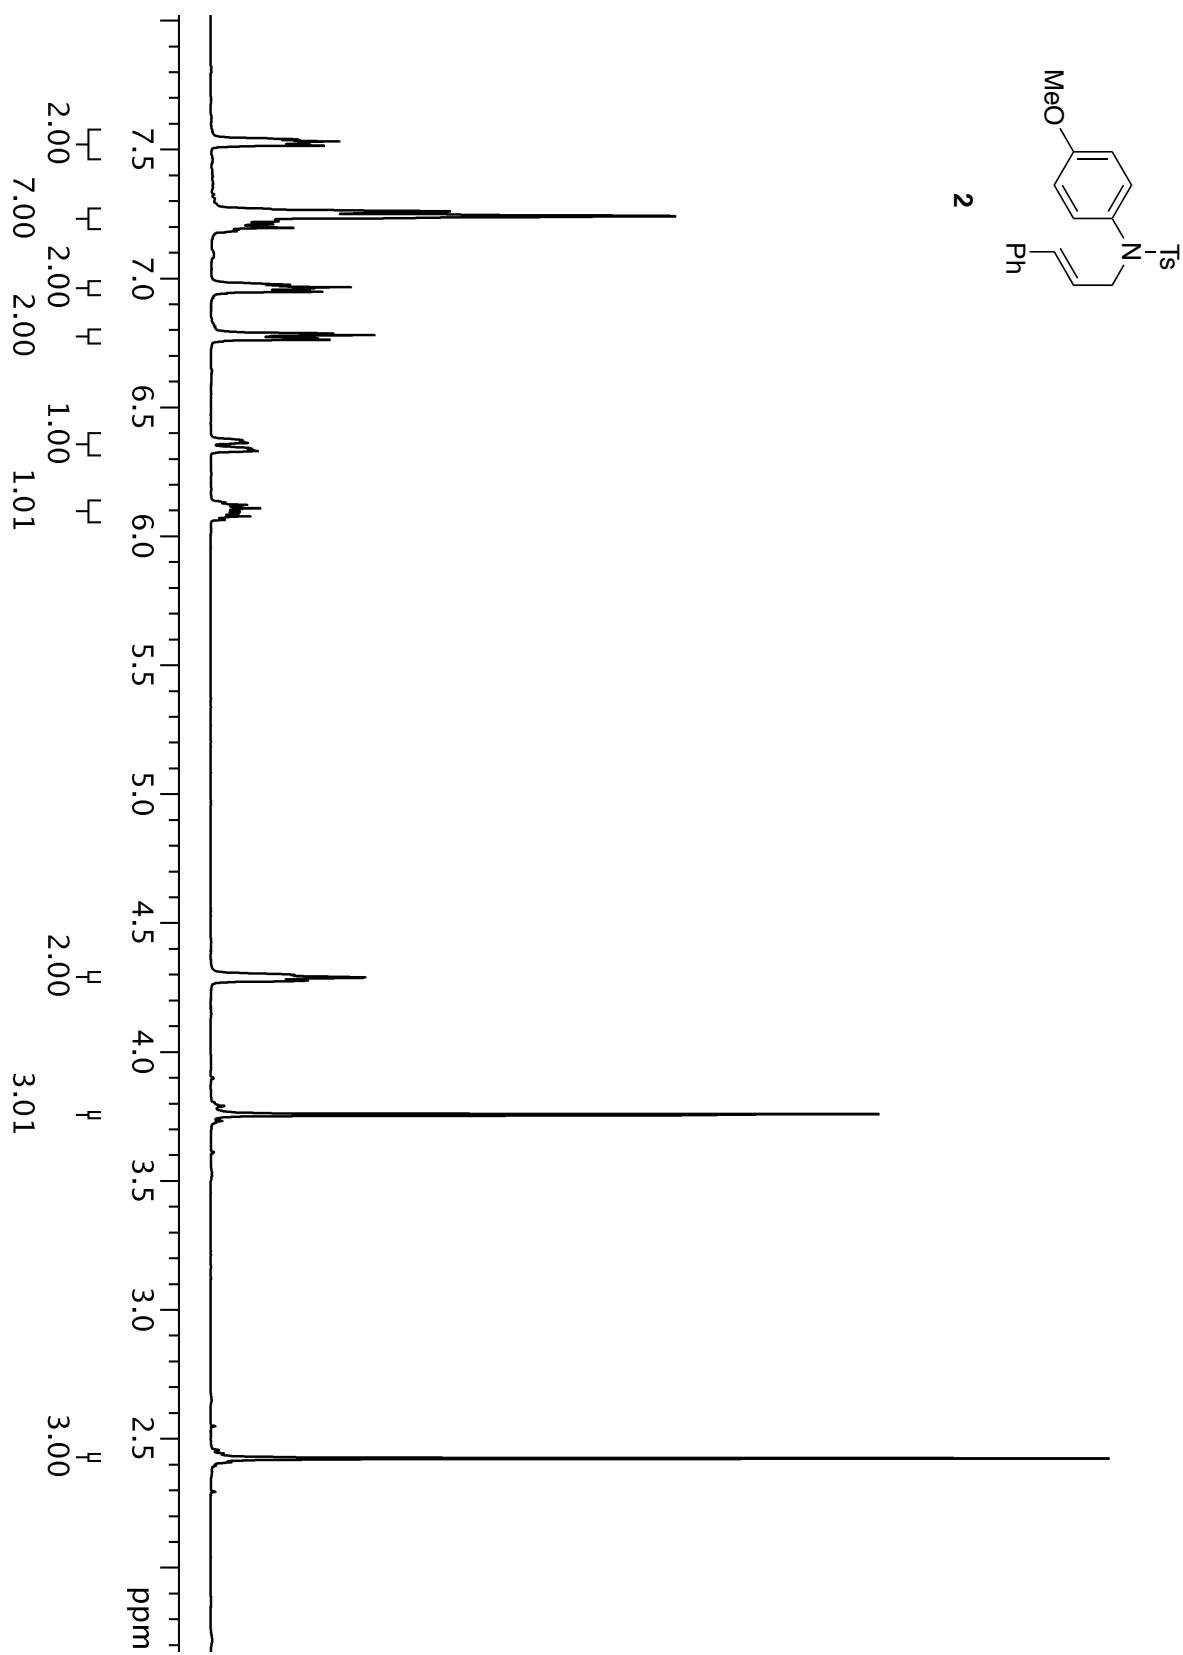

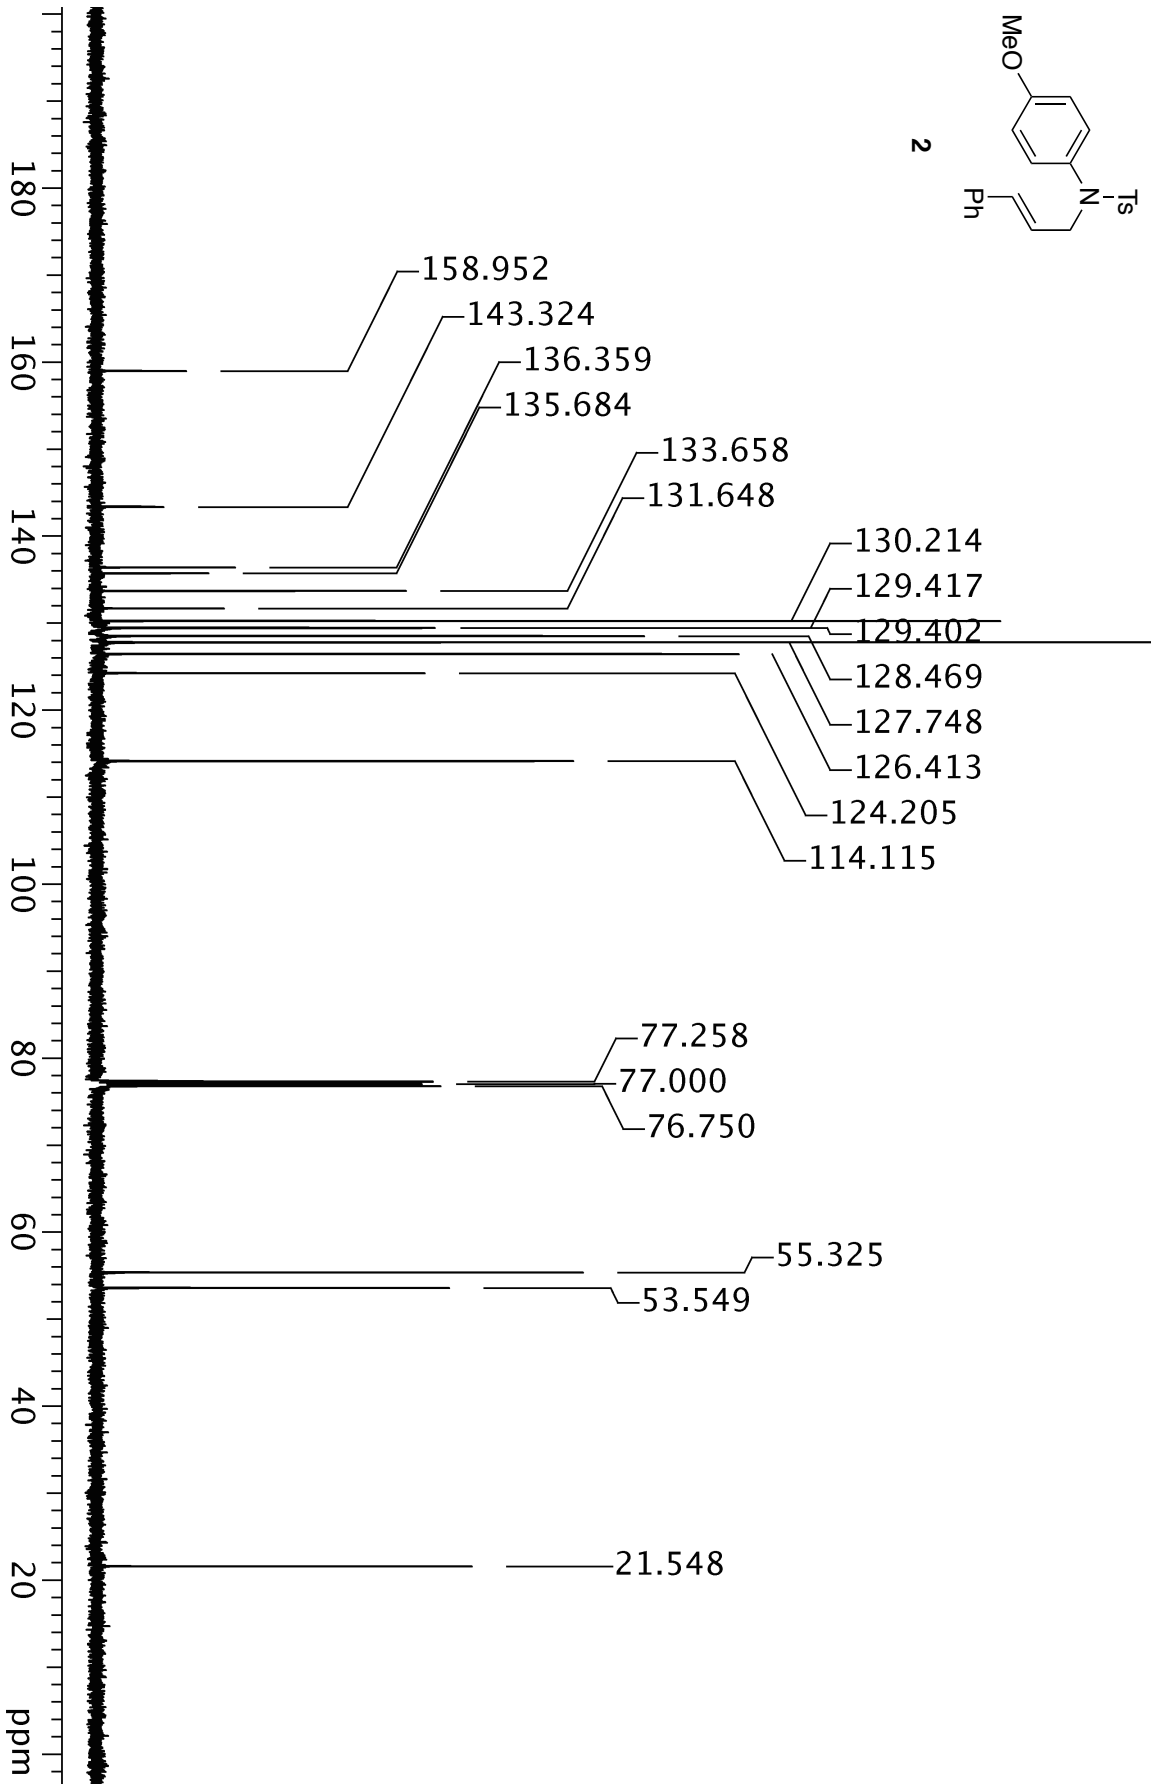

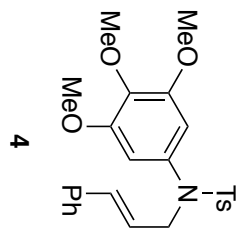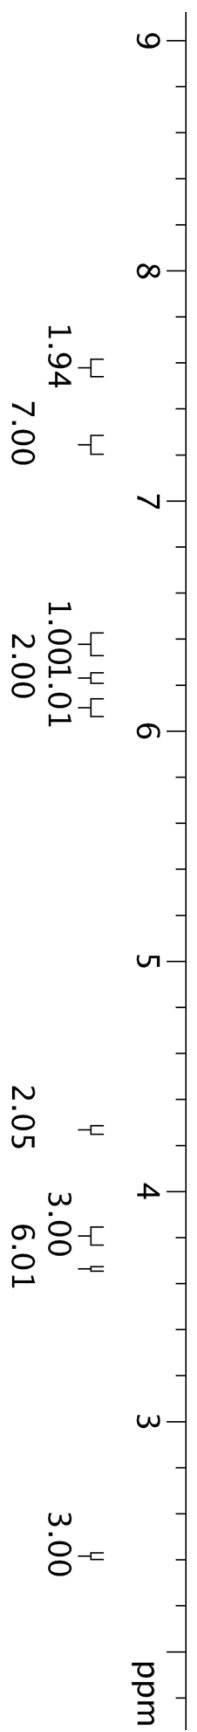

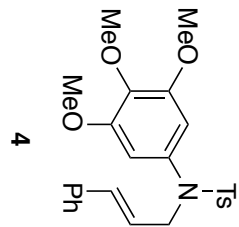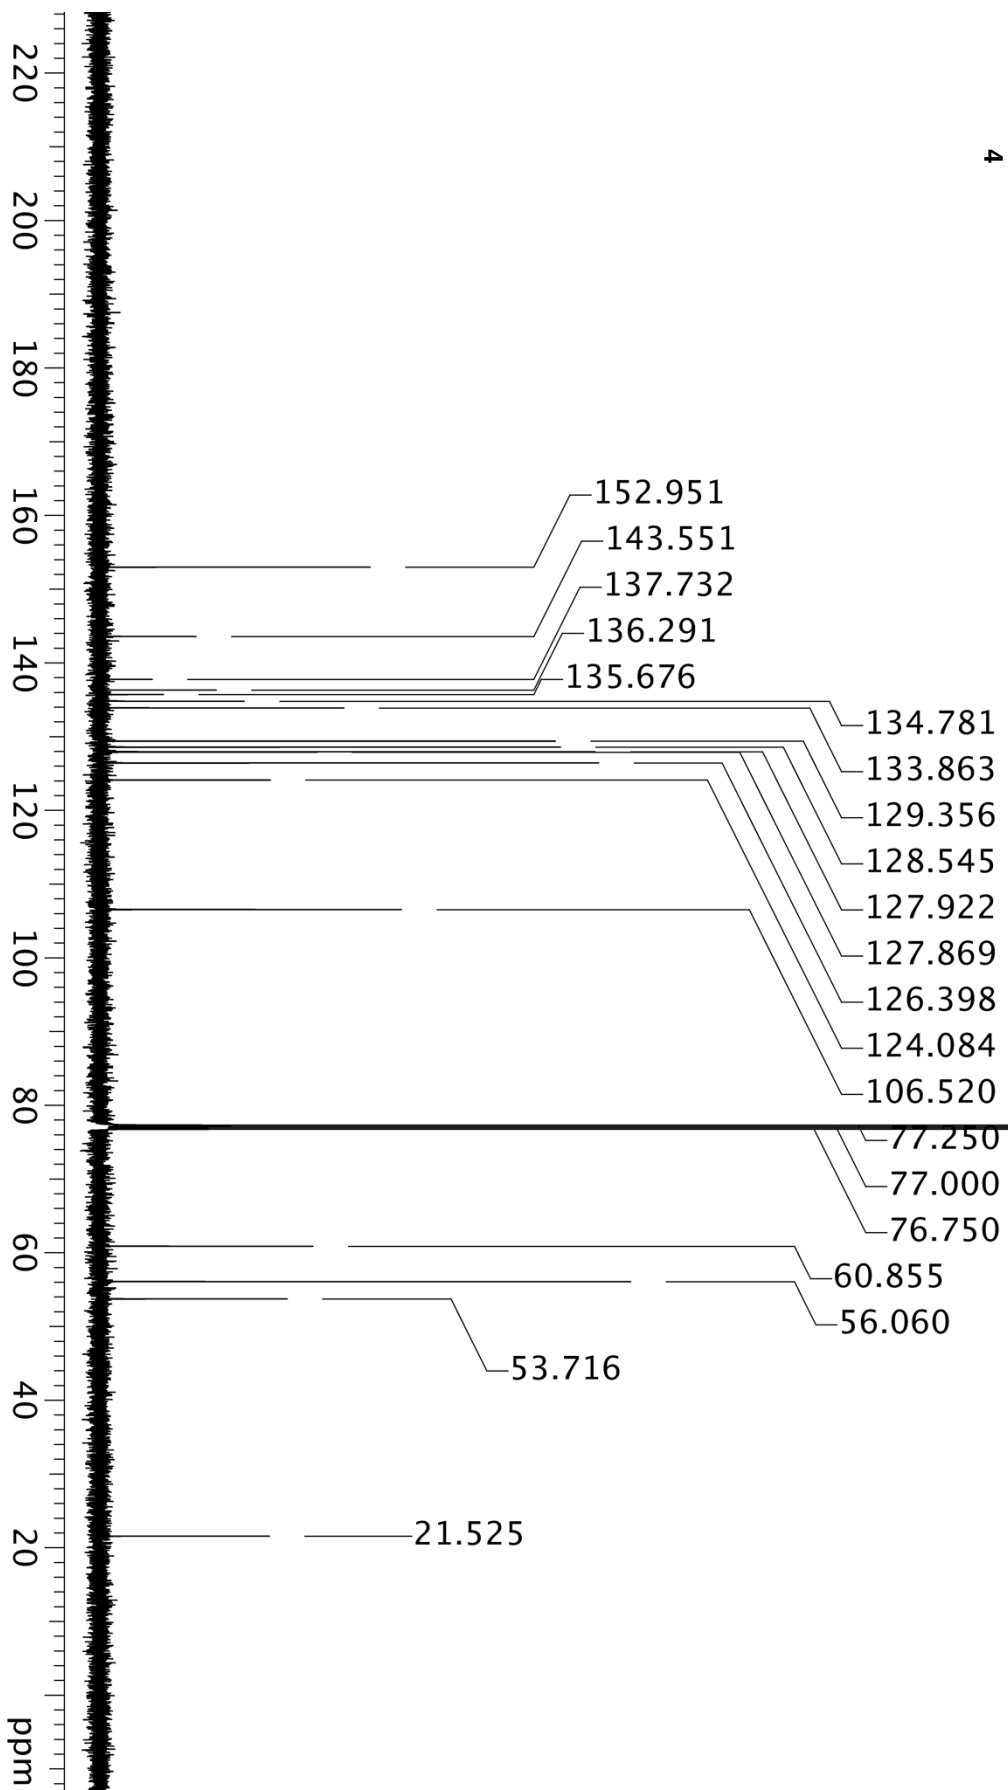

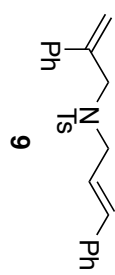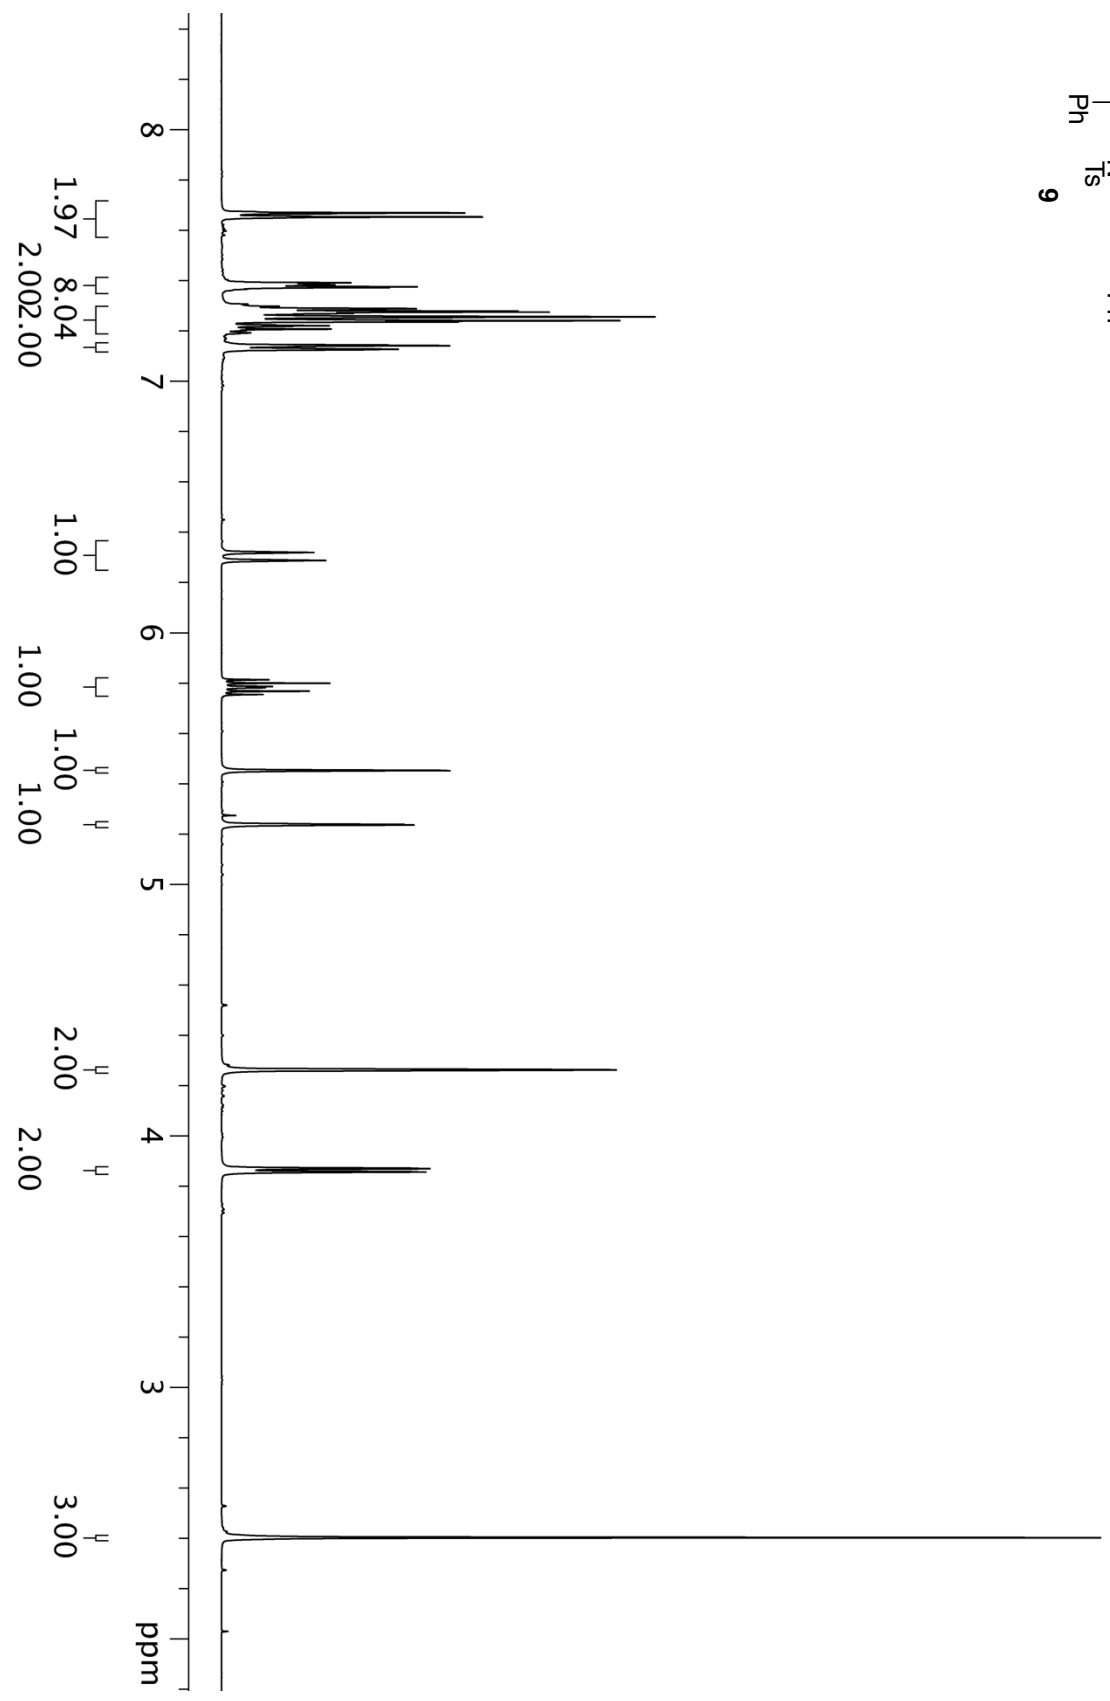



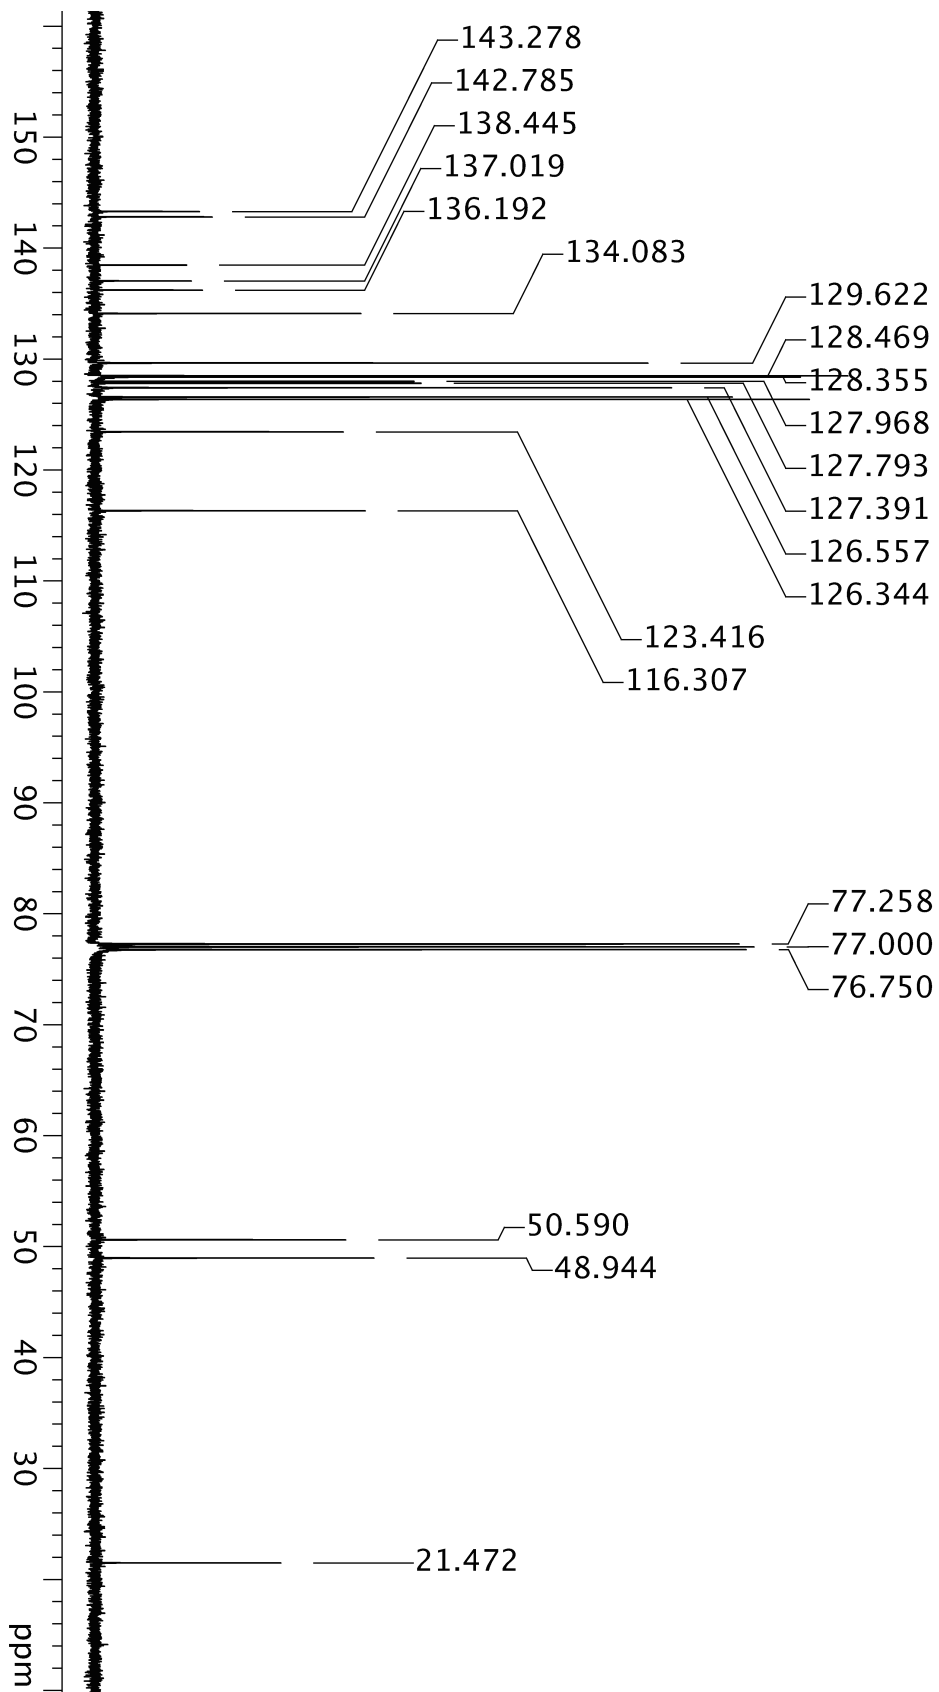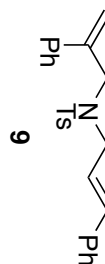

### VIII. References:

- (1) Snyder, S. A.; Treitler, D. S.; Brucks, A. P. *J. Am. Chem. Soc.* **2010**, *132*, 14303.
- (2) (a) Smith, B. J.; Radom, L. *J. Am. Chem. Soc.* **1993**, *115*, 4885; (b) Delbene, J. E. *J. Phys. Chem.* **1993**, *97*, 107; (c) Curtiss, L. A.; Raghavachari, K.; Pople, J. A. *J. Chem. Phys.* **1993**, *98*, 1293.
- (3) Tolman, C. A. *J. Am. Chem. Soc.* **1970**, *92*, 2956.
- (4) (a) Yousefi, R.; Ashtekar, K. D.; Whitehead, D. C.; Jackson, J. E.; Borhan, B. *J. Am. Chem. Soc.* **2013**, *135*, 14524; (b) Haubenstock, H.; Sauers, R. R. *Tetrahedron* **2005**, *61*, 8358.
- (5) Homsí, F.; Sylvie, R.; Rousseau, G. *Org. Synth.* **2000**, *77*, 206.
- (6) Baruah, S. K.; Baruah, R. *Asian J. Chem.* **2004**, *16*, 688.
- (7) Esteves-Souza, A.; Rodrigues-Santos, C. E.; Del Cistia, C. D.; da Silva, D. R.; Sant'Anna, C. M. R.; Echevarria, A. *Molecules* **2012**, *17*, 12882.
- (8) Oppolzer, W. *Helv. Chim. Acta* **1974**, *57*, 2610.
