# Supplementary material
Source: PubMed Central journal article supplement (PMC4183602)
Supplement: ja506889c_si_002.pdf [file ja506889c_si_002.pdf]

## ALKENES, ALKYNES AND AROMATICS BASED ACCEPTORS

| Label | Name                               | Structure                                                                           | Binding Site | Cl <sup>+</sup> affinity kcal/mol | X-Cl distance (Å) |
|-------|------------------------------------|-------------------------------------------------------------------------------------|--------------|-----------------------------------|-------------------|
| A1    | ethyne                             |    | C1-C2        | 114.5                             | 1.902             |
| A2    | prop-1-yne                         |    | C1           | 136.9                             | 1.722             |
| A3    | but-2-yne                          |    | C2           | 143.3                             | 1.768             |
| A4    | but-1-yne                          |    | C1           | 142.0                             | 1.724             |
| A5    | 3-methylbut-1-yne                  |    | C1           | 181.9                             | 1.681             |
| A6    | 3,3-dimethylbut-1-yne              |    | C1           | 192.0                             | 1.689             |
| A7    | 2,2,5,5-tetramethylhex-3-yne       |    | C3           | 156.6                             | 1.781             |
| A8    | ethynylbenzene                     |    | C1           | 168.1                             | 1.727             |
| A9    | prop-2-yn-1-ylbenzene              |    | C3           | 195.0                             | 1.703             |
| A10   | 1,2-diphenylethyne                 |    | C1           | 169.3                             | 1.674             |
| A11   | (3,3-dimethylbut-1-yn-1-yl)benzene |    | C2           | 172.6                             | 1.755             |
| A12   | ethynyltrimethylsilane             |  | C1           | 187.0                             | 1.833             |
| A13   | trimethyl(prop-1-yn-1-yl)silane    |  | C2           | 148.6                             | 1.789             |
| A14   | trimethyl(prop-2-yn-1-yl)silane    |  | C3           | 171.9                             | 1.727             |
| A15   | ethynylcyclopropane                |  | C2           | 164.9                             | 1.721             |
| A16   | prop-1-yn-1-ylcyclopropane         |  | C2           | 168.0                             | 1.743             |
| A17   | cyclooctyne                        |  | C1-C2        | 164.0                             | 1.749             |
| A18   | ethynamine                         |  | C2           | 177.1                             | 1.709             |
| A19   | <i>N</i> -methylethynamine         |  | C2           | 187.4                             | 1.713             |
| A20   | <i>N,N</i> -dimethylethynamine     |  | C2           | 195.0                             | 1.718             |
| AO42  | methoxyethyne                      |  | C2<br>O      | 162.8<br>NA                       | 1.717<br>NA       |

| Label | Name                           | Structure                                                                           | Binding Site | Cl <sup>+</sup> affinity kcal/mol | X-Cl distance (Å) |
|-------|--------------------------------|-------------------------------------------------------------------------------------|--------------|-----------------------------------|-------------------|
| A21   | 1-methoxyprop-1-yne            | 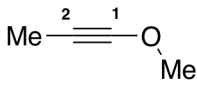   | C2           | 202.9                             | 1.738             |
| AO43  | (ethoxyethynyl)trimethylsilane |    | C1<br>O      | 175.9<br>NA                       | 1.732<br>NA       |
| A22   | <i>N</i> -ethynylacetamide     |    | C2           | 172.3                             | 1.712             |
| A23   | propiolamide                   |    | C2-C3        | 146.4                             | 1.699             |
| A24   | but-3-yn-2-one                 |    | C3-C4        | 138.7                             | 1.692             |
| A25   | pent-3-yn-2-one                |   | C3-C4        | 140.2                             | 1.696             |
| A26   | 1,3-diphenylprop-2-yn-1-one    |  | C2           | 167.8                             | 1.730             |
| A27   | but-2-ynoic acid               |  | C2-C3        | 133.3                             | 1.720             |
| A28   | propionic acid                 |  | C2-C3        | 125.6                             | 1.697             |
| A29   | methyl propiolate              |  | C2-C3        | 135.1                             | 1.695             |
| A30   | methyl but-2-ynoate            |  | C2           | 154.8                             | 1.687             |
| A31   | methyl 3-methoxypropiolate     |  | C2           | 162.4                             | 1.711             |

| Label | Name                       | Structure | Binding Site | Cl <sup>+</sup> affinity<br>kcal/mol | X-Cl distance<br>(Å) |
|-------|----------------------------|-----------|--------------|--------------------------------------|----------------------|
| A32   | ethynyl acetate            |           | C2           | 170.8                                | 1.731                |
| A33   | buta-1,3-diyne             |           | C1           | 140.7                                | 1.705                |
| AO41  | (ethynyloxy)ethyne         |           | C2<br>O      | 144.2<br>NA                          | 1.715<br>NA          |
| A34   | hexa-2,4-diyne             |           | C2           | 160.1                                | 1.733                |
| A35   | 1,4-diphenylbuta-1,3-diyne |           | C1           | 177.4                                | 1.751                |
| A36   | hexa-1,3,5-triyne          |           | C3<br>C1     | 134.8<br>156.5                       | 1.733<br>1.707       |
| A37   | but-1-en-3-yne             |           | C4<br>C1     | 151.6<br>142.1                       | 1.721<br>1.828       |
| A38   | (E)-hex-2-en-4-yne         |           | C5<br>C2     | 168.6<br>160.0                       | 1.745<br>1.848       |
| A39   | (Z)-hex-2-en-4-yne         |           | C5<br>C2     | 166.2<br>159.3                       | 1.747<br>1.855       |
| A40   | pent-1-en-4-yne            |           | C5<br>C1     | 168.5<br>147.9                       | 1.683<br>1.811       |
| A41   | (E)-hept-2-en-5-yne        |           | C6<br>C2     | 203.6<br>162.1                       | 1.711<br>1.829       |
| A42   | (Z)-hept-2-en-5-yne        |           | C6<br>C2     | 169.4<br>162.4                       | 1.745<br>1.830       |
| A43   | 1-ethynyl-4-vinylbenzene   |           | C1<br>C2     | 177.1<br>171.2                       | 1.733<br>1.815       |
| A44   | ethene                     |           | C1-C2        | 136.2                                | 1.892                |
| A45   | prop-1-ene                 |           | C1-C2        | 146.0                                | 1.862                |
| A46   | but-1-ene                  |           | C1-C2        | 148.4                                | 1.855                |

| Label | Name                         | Structure                                                                           | Binding Site | Cl <sup>+</sup> affinity kcal/mol | X-Cl distance (Å) |
|-------|------------------------------|-------------------------------------------------------------------------------------|--------------|-----------------------------------|-------------------|
| A47   | 3-methylbut-1-ene            | 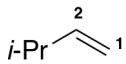   | C1-C2        | 150.9                             | 1.848             |
| A48   | 3,3-dimethylbut-1-ene        |    | C1           | 153.6                             | 1.836             |
| A49   | styrene                      |    | C1           | 167.4                             | 1.815             |
| A50   | 3-phenylpropene              |    | C1           | 165.0                             | 1.804             |
| AO11* | prop-2-en-1-ol               |    | O<br>C3      | 109.8<br>147.4                    | 1.746<br>1.799    |
| A51   | prop-2-ene-1,1-diyldibenzene |    | C3           | 181.1                             | 1.808             |
| AO37  | ethoxyethene                 |    | C2<br>O      | 165.5<br>NA                       | 1.808<br>NA       |
| A52   | N-ethylethenamine            |    | C2           | 193.0                             | 1.801             |
| A53   | N-vinylacetamide             |   | C2           | 169.7                             | 1.804             |
| A54   | acrylamide                   |  | C2-C3        | 135.4                             | 1.882             |
| A55   | methyl acrylate              |  | C2-C3        | 133.1                             | 1.882             |
| A56   | acrylic acid                 |  | C2-C3        | 128.0                             | 1.884             |
| A57   | vinyl acetate                |  | C2           | 158.9                             | 1.806             |
| A58   | but-3-en-2-one               |  | C3-C4        | 133.4                             | 1.882             |
| AS20  | phenyl(vinyl)sulfane         |  | S<br>C2      | 159.4<br>171.5                    | 2.089<br>1.811    |
| A59   | 2-methylprop-1-ene           |  | C1           | 155.8                             | 1.831             |
| A60   | 3-methylenepentane           |  | C1           | 161.6                             | 1.824             |

\*Addition of Cl<sup>+</sup> to the olefin leads to the epoxide during geometry optimization.

| Label | Name                                   | Structure                                                                           | Binding Site | Cl <sup>+</sup> affinity kcal/mol | X-Cl distance (Å) |
|-------|----------------------------------------|-------------------------------------------------------------------------------------|--------------|-----------------------------------|-------------------|
| A61   | 2,4-dimethyl-3-methylenepentane        | 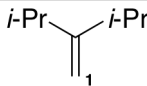   | C1           | 202.9                             | 1.818             |
| A62   | 2,2,4,4-tetramethyl-3-methylenepentane |    | C1           | 165.7                             | 1.819             |
| A63   | α-methylstyrene                        |    | C1           | 173.7                             | 1.813             |
| AO39  | 2-ethoxyprop-1-ene                     |    | C1<br>O      | 176.9<br>NA                       | 1.808<br>NA       |
| A64   | N-ethylprop-1-en-2-amine               |    | C1           | 200.9                             | 1.802             |
| A65   | ethene-1,1-diyldibenzene               |    | C2           | 182.2                             | 1.814             |
| A66   | trans-but-2-ene                        |    | C2-C3        | 153.7                             | 1.955             |
| A67   | cis-but-2-ene                          |  | C2-C3        | 154.1                             | 1.957             |
| A68   | trans-2,2,5,5-tetramethylhex-3-ene     |  | C3-C4        | 163.2                             | 1.972             |
| A69   | cis-2,2,5,5-tetramethylhex-3-ene       |  | C3-C4        | 162.9                             | 1.957             |
| A70   | (E)-(3,3-dimethylbut-1-en-1-yl)benzene |  | C2<br>C1     | 171.7<br>172.9                    | 1.846<br>1.848    |
| A71   | β-methylstyrene                        |  | C2           | 170.1                             | 1.838             |
| A72   | trans-stilbene                         |  | C1           | 169.7                             | 1.815             |
| A73   | cis-stilbene                           |  | C1           | 168.1                             | 1.846             |
| A74   | (E)-N-ethylprop-1-en-1-amine           |  | C2           | 196.1                             | 1.821             |
| AO38  | (E)-1-ethoxyprop-1-ene                 |  | C2<br>O      | 171.3<br>NA                       | 1.835<br>NA       |

| Label | Name                                        | Structure                                                                           | Binding Site | Cl <sup>+</sup> affinity kcal/mol | X-Cl distance (Å) |
|-------|---------------------------------------------|-------------------------------------------------------------------------------------|--------------|-----------------------------------|-------------------|
| A75   | (E)-pent-3-en-2-one                         | 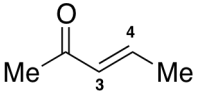   | C3-C4        | 141.1                             | 1.883             |
| A76   | (E)-1,3-diphenyl-2-propene-1-one (chalcone) |    | C2           | 168.9                             | 1.781             |
| A77   | (E)-but-2-enoic acid                        |    | C2-C3        | 136.5                             | 1.874             |
| A78   | (Z)-but-2-enoic acid                        |    | C2-C3        | 136.9                             | 1.871             |
| A79   | (E)-methyl but-2-enoate                     |    | C2-C3        | 140.4                             | 1.881             |
| A80   | (Z)-methyl but-2-enoate                     |    | C2-C3        | 141.1                             | 1.876             |
| AO40  | (E)-methyl 3-methoxyacrylate                |    | C2<br>O      | 160.6<br>NA                       | 1.787<br>NA       |
| A81   | 2-methylbut-2-ene                           |   | C3           | 161.0                             | 1.887             |
| A82   | 2-methylpent-2-ene                          |  | C3           | 166.3                             | 1.870             |
| A83   | 2,3-dimethylbut-2-ene                       |  | C2-C3        | 166.3                             | 2.001             |
| A84   | (E)-2,3-diphenyl-2-butene                   |  | C2           | 170.2                             | 1.874             |
| A85   | (Z)-2,3-diphenyl-2-butene                   |  | C2           | 174.7                             | 1.867             |
| A86   | cyclopropene                                |  | C1-C2        | 141.1                             | 1.899             |
| A87   | cyclobutene                                 |  | C1-C2        | 147.9                             | 1.935             |
| A88   | cyclopentene                                |  | C1-C2        | 155.5                             | 1.958             |

| Label | Name                                 | Structure                                                                           | Binding Site | Cl <sup>+</sup> affinity kcal/mol | X-Cl distance (Å) |
|-------|--------------------------------------|-------------------------------------------------------------------------------------|--------------|-----------------------------------|-------------------|
| A89   | cyclohexene                          |    | C1-C2        | 154.8                             | 1.962             |
| A90   | cycloheptene                         |    | C1-C2        | 156.9                             | 1.962             |
| A91   | <i>cis</i> -cyclooctene              |    | C1-C2        | 159.2                             | 1.827             |
| A92   | <i>trans</i> -cyclooctene            |    | C1-C2        | 170.3                             | 1.970             |
| A93   | bicyclo[2.2.0]hex-1(4)-ene           |    | C1-C4        | 162.2                             | 1.950             |
| A94   | 1,2,3,4,5,6-hexahydropentalene       |    | C1-C5        | 169.1                             | 2.005             |
| A95   | 1,2,3,4,5,6,7,8-octahydronaphthalene |   | C1-C6        | 165.2                             | 2.029             |
| A96   | methylenecyclopropane                |  | C1           | 147.9                             | 1.871             |
| A97   | methylenecyclobutane                 |  | C1           | 155.9                             | 1.830             |
| A98   | methylenecyclopentane                |  | C1           | 161.5                             | 1.819             |
| A99   | methylenecyclohexane                 |  | C1           | 162.1                             | 1.822             |
| A100  | cycloprop-2-enone                    |  | C2-C3        | 101.1                             | 1.875             |
| A101  | cyclobut-2-enone                     |  | C2-C3        | 127.2                             | 1.896             |
| A102  | cyclopent-2-enone                    |  | C2-C3        | 131.9                             | 1.893             |
| A103  | cyclohex-2-enone                     |  | C2-C3        | 137.7                             | 1.891             |
| A104  | cyclohept-2-enone                    |  | C2-C3        | 140.1                             | 1.906             |

| Label | Name                                     | Structure                                                                           | Binding Site | Cl <sup>+</sup> affinity kcal/mol | X-Cl distance (Å) |
|-------|------------------------------------------|-------------------------------------------------------------------------------------|--------------|-----------------------------------|-------------------|
| A105  | 1-methylcyclohex-1-ene                   | 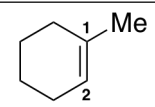   | C2           | 162.2                             | 1.867             |
| A106  | 1,2-dimethylcyclohex-1-ene               |    | C1-C2        | 166.1                             | 1.974             |
| A107  | 1-methoxycyclohex-1-ene                  |    | C2           | 180.2                             | 1.830             |
| A108  | [1,1'-bi(cyclohexane)]-1,1'-diene        |    | C2           | 181.4                             | 1.835             |
| A109  | 2,3,4,5-tetrahydro-1,1'-biphenyl         |    | C2           | 177.5                             | 1.830             |
| A110  | 1,2-dihydronaphthalene                   |   | C2           | 173.7                             | 1.842             |
| A111  | 1 <i>H</i> -indene                       |  | C2           | 170.4                             | 1.813             |
| A112  | 2,3-dihydrofuran                         |  | C3           | 169.9                             | 1.822             |
| A113  | 3,4-dihydro-2 <i>H</i> -pyran            |  | C3           | 169.2                             | 1.810             |
| A114  | 2,3-dihydro-1,4-dioxine                  |  | C3           | 164.6                             | 1.878             |
| A115  | 1-methyl-2,3-dihydro-1 <i>H</i> -pyrrole |  | C4           | 201.7                             | 1.819             |
| A116  | 1-methyl-1,2,3,4-tetrahydropyridine      |  | C5           | 200.0                             | 1.812             |



| Label  | Name                                         | Structure                                                                           | Binding Site | Cl <sup>+</sup> affinity<br>kcal/mol | X-Cl distance<br>(Å) |
|--------|----------------------------------------------|-------------------------------------------------------------------------------------|--------------|--------------------------------------|----------------------|
| ANO44  | 4-methyl-3,4-dihydro-2 <i>H</i> -1,4-oxazine | 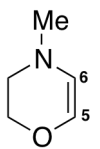   | C5<br>O<br>N | 196.1<br>NA<br>NA                    | 1.851<br>NA<br>NA    |
| A117   | cyclobuta-1,3-diene                          |    | C1           | 193.4                                | 1.754                |
| A118   | cyclopenta-1,3-diene                         |    | C1           | 162.4                                | 1.804                |
| A119   | cyclohexa-1,4-diene                          |    | C1-C2        | 153.6                                | 1.960                |
| A120   | 1,5-dimethylcyclohexa-1,4-diene              |    | C2           | 162.2                                | 1.887                |
| A121*  | <i>trans</i> -cyclohexa-2,5-diene-1,4-diol   |   | C2           | 165.4                                | 1.799                |
| A122   | <i>para</i> -benzoquinone                    |  | C2-C3        | 118.4                                | 1.918                |
| A123   | bicyclo[2.2.1]hept-2-ene                     |  | C2-C3        | 161.0                                | 1.960                |
| A124   | bicyclo[2.2.2]oct-2-ene                      |  | C2-C3        | 158.2                                | 1.953                |
| A125   | 7,7-dimethylbicyclo[2.2.1]hept-2-ene         |  | C2-C3        | 155.7                                | 1.969                |
| A126** | bicyclo[2.2.2]octa-2,5-diene                 |  | C2           | 174.1                                | 1.792                |
| A127   | bicyclo[2.2.1]hepta-2,5-diene                |  | C2           | 175.1                                | 1.783                |
| A128   | 7,7-dimethylbicyclo[2.2.1]hepta-2,5-diene    |  | C2           | 180.7                                | 1.795                |

\*Addition of Cl<sup>+</sup> to the olefin leads to the epoxide during geometry optimization. \*\*Addition of Cl<sup>+</sup> to the olefin results in anchimeric assistance of the other olefin leading to a C-C bond formation.

| Label | Name                                                                          | Structure                                                                           | Binding Site                | Cl <sup>+</sup> affinity kcal/mol | X-Cl distance (Å) |
|-------|-------------------------------------------------------------------------------|-------------------------------------------------------------------------------------|-----------------------------|-----------------------------------|-------------------|
| AN66  | 1-azabicyclo[2.2.2]oct-2-ene                                                  |    | C2-C3                       | 152.6                             | 1.924             |
|       |                                                                               |                                                                                     | N                           | 168.2                             | 1.780             |
| AN64  | 7-methyl-7-azabicyclo[2.2.1]hept-2-ene                                        |    | N (N-Cl <i>syn</i> to C=C)  | 169.0                             | 1.796             |
|       |                                                                               |                                                                                     | N (N-Cl <i>anti</i> to C=C) | 170.8                             | 1.794             |
|       |                                                                               |                                                                                     | C2                          | 188.4                             | 1.781             |
| A129  | buta-1,3-diene                                                                |    | C1                          | 149.8                             | 1.822             |
| A130  | (2 <i>E</i> ,4 <i>E</i> )-hexadiene                                           |    | C2                          | 165.1                             | 1.839             |
| A131  | (2 <i>Z</i> ,4 <i>Z</i> )-hexadiene                                           |    | C2                          | 167.2                             | 1.850             |
| A132  | 2,3-dimethylbuta-1,3-diene                                                    |    | C1                          | 163.8                             | 1.818             |
| A133  | (E)-hexa-1,3,5-triene                                                         |  | C1                          | 171.8                             | 1.815             |
|       |                                                                               |                                                                                     | C3-C4                       | 152.8                             | 1.981             |
| A134  | (3 <i>E</i> ,5 <i>E</i> )-octa-1,3,5,7-tetraene                               |  | C1                          | 184.7                             | 1.814             |
|       |                                                                               |                                                                                     | C3                          | 168.0                             | 1.854             |
| A135  | (3 <i>E</i> ,5 <i>E</i> ,7 <i>E</i> )-deca-1,3,5,7,9-pentaene                 |  | C1                          | 194.1                             | 1.817             |
|       |                                                                               |                                                                                     | C3                          | 178.8                             | 1.847             |
|       |                                                                               |                                                                                     | C5                          | 169.9                             | 1.820             |
| A136  | (3 <i>E</i> ,5 <i>E</i> ,7 <i>E</i> ,9 <i>E</i> )-dodeca-1,3,5,7,9,11-hexaene |  | C1                          | 200.7                             | 1.819             |
|       |                                                                               |                                                                                     | C3                          | 186.8                             | 1.848             |
|       |                                                                               |                                                                                     | C5                          | 179.3                             | 1.843             |
| A137  | (E)-2,6-dimethylnona-2,6-diene                                                |  | C3                          | 164.5                             | 1.918             |
|       |                                                                               |                                                                                     | C7                          | 170.3                             | 1.850             |
| A138  | (6 <i>E</i> ,10 <i>E</i> )-2,6,10-trimethyltrideca-2,6,10-triene              |  | C3                          | 167.7                             | 1.929             |
|       |                                                                               |                                                                                     | C7                          | 171.5                             | 1.853             |
|       |                                                                               |                                                                                     | C11                         | 172.3                             | 1.837             |

| Label | Name                      | Structure                                                                           | Binding Site | Cl <sup>+</sup> affinity<br>kcal/mol | X-Cl<br>distance<br>(Å) |
|-------|---------------------------|-------------------------------------------------------------------------------------|--------------|--------------------------------------|-------------------------|
| A139  | cyclohexa-1,3-dien-5-yne  |    | C5           | 170.8                                | 1.698                   |
| A140  | benzene                   |    | C            | 139.0                                | 1.805                   |
| AO141 | nitrobenzene              |    | O<br>C3      | 118.2<br>121.8                       | 1.709<br>1.804          |
| A142  | hexafluorobenzene         |    | C            | 121.4                                | 1.797                   |
| A143  | fluorobenzene             |    | C2<br>C4     | 137.9<br>141.0                       | 1.807<br>1.814          |
| A144  | chlorobenzene             |   | C2<br>C4     | 136.6<br>139.5                       | 1.815<br>1.816          |
| A145  | bromobenzene              |  | C2<br>C4     | 137.1<br>140.1                       | 1.815<br>1.820          |
| A146  | iodobenzene               |  | C2<br>C4     | 139.3<br>142.2                       | 1.822<br>1.821          |
| A147  | toluene                   |  | C2<br>C4     | 147.2<br>148.4                       | 1.803<br>1.812          |
| A148  | cumene                    |  | C4           | 150.7                                | 1.816                   |
| A149  | <i>tert</i> -butylbenzene |  | C2<br>C4     | 146.6<br>151.5                       | 1.842<br>1.817          |
| A150  | <i>o</i> -xylene          |  | C4           | 151.2                                | 1.817                   |
| A151  | <i>m</i> -xylene          |  | C2<br>C4     | 153.0<br>155.5                       | 1.831<br>1.813          |

| Label | Name                          | Structure                                                                           | Binding Site   | Cl <sup>+</sup> affinity kcal/mol | X-Cl distance (Å)       |
|-------|-------------------------------|-------------------------------------------------------------------------------------|----------------|-----------------------------------|-------------------------|
| A152  | <i>p</i> -xylene              | 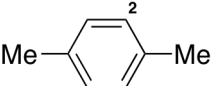   | C2             | 150.7                             | 1.805                   |
| AO153 | anisole                       |    | C2<br>O        | 155.6<br>112.1                    | 1.826<br>2.026          |
| A154  | 1,2-dimethoxybenzene          |    | C3<br>C4       | 161.3<br>166.7                    | 1.821<br>1.830          |
| A155  | 1,3-dimethoxybenzene          |    | C2<br>C4       | 171.3<br>174.3                    | 1.819<br>1.821          |
| A156  | 1,4-dimethoxybenzene          |    | C2             | 158.4                             | 1.825                   |
| AS3   | benzenethiol                  |   | C2<br>C4<br>S  | 149.2<br>152.9<br>146.8           | 1.804<br>1.824<br>2.089 |
| AO12  | phenol                        |  | C2<br>O        | 152.3<br>106.3                    | 1.814<br>2.138          |
| AO13  | <i>p</i> -cresol              |  | C2<br>O        | 157.9<br>113.9                    | 1.806<br>2.205          |
| AO14  | 4-( <i>tert</i> -butyl)phenol |  | C2<br>O        | 159.1<br>116.5                    | 1.818<br>2.247          |
| AO15  | 4-methoxyphenol               |  | C2<br>C3<br>O1 | 156.0<br>158.4<br>124.8           | 1.807<br>1.877<br>2.326 |
| AO16  | 2,4,6-trimethylphenol         |  | C3<br>O        | 159.3<br>124.6                    | 1.816<br>2.321          |
| AO17* | 4-fluorophenol                |  | C1<br>C2<br>O  | 137.4<br>146.1<br>NA              | 1.886<br>1.821<br>NA    |

\*Attempts for the geometry optimization of the structure in which Cl<sup>+</sup> was attached to OH resulted in the migration of the halogen to C1.

| Label | Name                  | Structure                                                                           | Binding Site  | Cl <sup>+</sup> affinity kcal/mol | X-Cl distance (Å)       |
|-------|-----------------------|-------------------------------------------------------------------------------------|---------------|-----------------------------------|-------------------------|
| AO18  | 4-chlorophenol        | 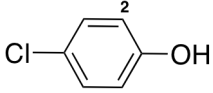   | C2<br>O       | 145.3<br>106.4                    | 1.816<br>2.211          |
| AO19  | 4-bromophenol         |    | C2<br>O       | 145.7<br>107.2                    | 1.816<br>2.222          |
| AO20  | 4-iodophenol          |    | C2<br>O       | 147.2<br>110.1                    | 1.816<br>2.240          |
| AO21  | hydroquinone          |    | C2<br>O       | 153.9<br>120.5                    | 1.807<br>2.216          |
| AO22  | resorcinol            |    | C2<br>C4<br>O | 162.4<br>165.9<br>108.4           | 1.816<br>1.816<br>2.178 |
| AO23* | pyrocatechol          |    | C3<br>C4<br>O | 152.9<br>154.1<br>NA              | 1.808<br>1.823<br>NA    |
| AO157 | 2-hydroxybenzaldehyde |  | C5<br>O       | 149.5<br>125.3                    | 1.822<br>1.727          |
| AO158 | 2-hydroxybenzoic acid |  | C5<br>O       | 153.7<br>124.7                    | 1.823<br>1.731          |
| A159  | benzoic acid          |  | C3            | 133.7                             | 1.804                   |
| A160  | methyl benzoate       |  | C3            | 137.2                             | 1.807                   |
| A161  | acetophenone          |  | C2<br>C3      | 134.8<br>134.7                    | 1.830<br>1.803          |
| AN162 | benzamide             |  | C3<br>N       | 137.2<br>133.0                    | 1.808<br>1.763          |

\*Attempts for the geometry optimization of the structure in which Cl<sup>+</sup> was attached to OH resulted in the migration of the halogen to C3.

| Label | Name                      | Structure                                                                           | Binding Site | Cl <sup>+</sup> affinity<br>kcal/mol | X-Cl<br>distance<br>(Å) |
|-------|---------------------------|-------------------------------------------------------------------------------------|--------------|--------------------------------------|-------------------------|
| A163  | 2-acetoxybenzoic acid     | 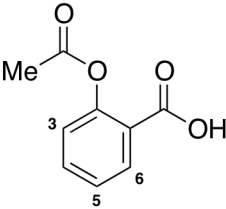   | C3           | 135.8                                | 1.818                   |
|       |                           |                                                                                     | C5           | 137.0                                | 1.819                   |
|       |                           |                                                                                     | C6           | 116.8                                | 1.836                   |
| AN164 | 2-aminobenzoic acid       |    | C5           | 168.6                                | 1.827                   |
|       |                           |                                                                                     | N            | 150.0                                | 1.810                   |
| A165  | <i>N</i> -phenylacetamide |    | C4           | 162.2                                | 1.824                   |
| A166  | benzenesulfonic acid      |    | C2           | 123.8                                | 1.814                   |
|       |                           |                                                                                     | C3           | 126.1                                | 1.803                   |
| A167  | naphthalene               |   | C1           | 156.5                                | 1.834                   |
|       |                           |                                                                                     | C2           | 152.8                                | 1.827                   |
| A168  | 1,1'-biphenyl             |  | C2           | 154.9                                | 1.833                   |
| A169  | anthracene                |  | C9           | 175.7                                | 1.848                   |
| A170  | phenanthrene              |  | C9           | 161.4                                | 1.854                   |
|       |                           |                                                                                     |              |                                      |                         |
| AN104 | 1 <i>H</i> -imidazole     |  | N1           | 107.7                                | 1.791                   |
|       |                           |                                                                                     | N3           | 159.5                                | 1.704                   |
|       |                           |                                                                                     | C2           | 151.8                                | 1.770                   |
|       |                           |                                                                                     | C4           | 149.9                                | 1.792                   |
| AN105 | 1 <i>H</i> -pyrrole       |  | N1           | 122.2                                | 1.796                   |
|       |                           |                                                                                     | C2           | 169.8                                | 1.785                   |
|       |                           |                                                                                     | C3           | 162.0                                | 1.801                   |

| Label | Name                                                             | Structure | Binding Site | Cl <sup>+</sup> affinity kcal/mol | X-Cl distance (Å) |
|-------|------------------------------------------------------------------|-----------|--------------|-----------------------------------|-------------------|
| ANP27 | 5-(dimethylphosphino)-1-phenyl-1 <i>H</i> -pyrazole              |           | P            | 205.9                             | 2.036             |
|       |                                                                  |           | N2           | 160.4                             | 1.696             |
|       |                                                                  |           | N1           | NA                                | Cl transfer to C3 |
|       |                                                                  |           | C5           | 160.1                             | 1.780             |
|       |                                                                  |           | C4           | 171.2                             | 1.805             |
|       |                                                                  |           | C3           | 159.3                             | 1.798             |
| ANP28 | 2-(di- <i>tert</i> -butylphosphino)-1-phenyl-1 <i>H</i> -pyrrole |           | P            | 217.9                             | 2.038             |
|       |                                                                  |           | N            | 131.8                             | 1.830             |
|       |                                                                  |           | C2           | 173.8                             | 1.798             |
|       |                                                                  |           | C3           | 177.6                             | 1.817             |
| AN106 | 1 <i>H</i> -indole                                               |           | N1           | 135.1                             | 1.829             |
|       |                                                                  |           | C2           | 170.1                             | 1.801             |
|       |                                                                  |           | C3           | 173.8                             | 1.812             |
| AN107 | 6-methoxyquinoline                                               |           | N            | 167.0                             | 1.734             |
|       |                                                                  |           | C5           | 165.9                             | 1.838             |
|       |                                                                  |           | C7           | 153.2                             | 1.829             |
|       |                                                                  |           | C9           | 142.1                             | 1.892             |
| AN108 | 7 <i>H</i> -purine                                               |           | N1           | 154.2                             | 1.728             |
|       |                                                                  |           | N2           | 156.6                             | 1.723             |
|       |                                                                  |           | N3           | 151.7                             | 1.702             |
|       |                                                                  |           | N5           | 106.2                             | 1.803             |
|       |                                                                  |           | C4           | 128.2                             | 1.775             |
| ANS10 | 1 <i>H</i> -pyrazolo[3,4- <i>d</i> ]pyrimidine-4-thiol           |           | S            | 132.3                             | 2.059             |
|       |                                                                  |           | N5           | 147.8                             | 1.730             |
|       |                                                                  |           | N7           | 148.2                             | 1.723             |
|       |                                                                  |           | N1           | 115.5                             | 1.772             |
|       |                                                                  |           | N2           | 140.3                             | 1.694             |
| ANS9  | 4 <i>H</i> -1,2,4-triazole-3-thiol                               |           | S            | 128.7                             | 2.086             |
|       |                                                                  |           | N4           | 96.5                              | 1.782             |
|       |                                                                  |           | C5           | 145.3                             | 1.769             |
|       |                                                                  |           | N2           | 153.0                             | 1.695             |

| Label | Name                                                                      | Structure                                                                         | Binding Site | Cl <sup>+</sup> affinity kcal/mol | X-Cl distance (Å) |
|-------|---------------------------------------------------------------------------|-----------------------------------------------------------------------------------|--------------|-----------------------------------|-------------------|
| AOP25 | 4-chlorodinaphtho[2,1- <i>d</i> :1',2'- <i>f</i> ][1,3,2]dioxaphosphepine | 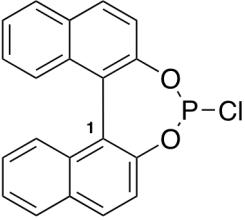 | P            | 181.0                             | 1.984             |
|       |                                                                           |                                                                                   | O            | NA                                | Cl transfer to C1 |
|       |                                                                           |                                                                                   | C1           | 152.0                             | 1.886             |
| AN109 | 1 <i>H</i> -benzimidazole                                                 |  | N1           | 122.4                             | 1.811             |
|       |                                                                           |                                                                                   | C2           | 153.7                             | 1.782             |
|       |                                                                           |                                                                                   | N3           | 163.0                             | 1.703             |
| AP29  | tri(furan-2-yl)phosphine                                                  |  | P            | 205.5                             | 2.046             |
|       |                                                                           |                                                                                   | C2           | 180.6                             | 1.706             |
|       |                                                                           |                                                                                   | C3           | 165.2                             | 1.807             |
|       |                                                                           |                                                                                   | C4           | 154.6                             | 1.827             |
|       |                                                                           |                                                                                   | C5           | 178.2                             | 1.778             |



## SULFUR BASED ACCEPTORS

| Label | Name                                                   | Structure                                                                           | Binding Site | Cl <sup>+</sup> affinity kcal/mol | X-Cl distance (Å) |
|-------|--------------------------------------------------------|-------------------------------------------------------------------------------------|--------------|-----------------------------------|-------------------|
| S1    | ethanethiol                                            | Et-SH                                                                               | S            | 141.1                             | 2.034             |
| S2    | 2-methylpropane-2-thiol                                | <i>i</i> -Pr-SH                                                                     | S            | 149.4                             | 2.037             |
| AS3   | benzenethiol                                           | 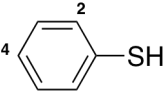   | S            | 146.8                             | 2.089             |
|       |                                                        |                                                                                     | C2           | 149.2                             | 1.804             |
| OS4   | 2-methoxyethanethiol                                   |    | S            | 149.1                             | 2.044             |
|       |                                                        |                                                                                     | O            | 107.0                             | 1.757             |
| OS5   | 2-mercapto-2-methylpropanoic acid                      |    | S            | 142.9                             | 2.071             |
|       |                                                        |                                                                                     | O1           | 119.4                             | 1.751             |
| NOS6  | 2-amino-3-mercaptopropanoic acid                       |    | S            | 175.6                             | 2.070             |
|       |                                                        |                                                                                     | O1           | 107.5                             | 1.747             |
|       |                                                        |                                                                                     | N            | 139.7                             | 1.777             |
| NS7   | 4-(dimethyl amino)benzenethiol                         |   | S            | 167.6                             | 2.213             |
|       |                                                        |                                                                                     | N            | 157.3                             | 1.976             |
| NS8   | 2-(1,4,5,6-tetrahydropyrimidin-2-yl)benzenethiol       |  | S            | 180.5                             | 2.103             |
|       |                                                        |                                                                                     | N1           | 156.4                             | 1.793             |
|       |                                                        |                                                                                     | N3           | 181.4                             | 1.725             |
| ANS9  | 4 <i>H</i> -1,2,4-triazole-3-thiol                     |  | S            | 128.7                             | 2.086             |
|       |                                                        |                                                                                     | N4           | 96.5                              | 1.782             |
|       |                                                        |                                                                                     | C5           | 145.3                             | 1.769             |
| ANS10 | 1 <i>H</i> -pyrazolo[3,4- <i>d</i> ]pyrimidine-4-thiol |  | S            | 132.3                             | 2.059             |
|       |                                                        |                                                                                     | N5           | 147.8                             | 1.730             |
|       |                                                        |                                                                                     | N7           | 148.2                             | 1.723             |
|       |                                                        |                                                                                     | N1           | 115.5                             | 1.772             |
|       |                                                        |                                                                                     | N2           | 140.3                             | 1.694             |
| S11   | dimethylsulfane                                        | Me-S-Me                                                                             | S            | 153.3                             | 2.037             |
| S12   | diethylsulfane                                         | Et-S-Et                                                                             | S            | 161.3                             | 2.042             |

| Label | Name                                                 | Structure | Binding Site | Cl <sup>+</sup> affinity kcal/mol | X-Cl distance (Å) |
|-------|------------------------------------------------------|-----------|--------------|-----------------------------------|-------------------|
| S13   | thiirane                                             |           | S            | 147.3                             | 2.031             |
| S14   | thietane                                             |           | S            | 155.2                             | 2.027             |
| S15   | tetrahydrothiophene                                  |           | S            | 159.1                             | 2.045             |
| S16   | tetrahydro-2H-thiopyran                              |           | S            | 161.5                             | 2.041             |
| S17   | di- <i>tert</i> -butylsulfane                        |           | S            | 170.7                             | 2.048             |
| S18   | diphenylsulfane                                      |           | S            | 163.5                             | 2.094             |
| S19   | dibenzylsulfane                                      |           | S            | 168.1                             | 2.050             |
| AS20  | phenyl(vinyl)sulfane                                 |           | S<br>C2      | 159.4<br>171.5                    | 2.089<br>1.811    |
| S21   | trimethyl(phenylthio)silane                          |           | S            | 165.8                             | 2.087             |
| S22   | 4-nitrophenyl hypochlorothioite                      |           | S            | 142.7                             | 2.047             |
| OS23  | <i>S</i> - <i>tert</i> -butyl carbonochloridothioate |           | S<br>O       | 136.6<br>105.9                    | 2.024<br>1.742    |
| OS24  | (methylsulfinyl)cyclopentane                         |           | O            | 144.6                             | 1.747             |
| OS25  | <i>S</i> -phenyl benzenesulfonylthioate              |           | S1<br>O      | 156.2<br>126.6                    | 2.058<br>1.744    |
| NS26  | benzothioamide                                       |           | S<br>N       | 175.8<br>129.3                    | 2.056<br>1.796    |
| NS27  | thiourea                                             |           | S<br>N       | 169.6<br>NA                       | 2.045<br>NA       |

| Label | Name                                                                                     | Structure                                                                            | Binding Site | Cl <sup>+</sup> affinity kcal/mol | X-Cl distance (Å) |
|-------|------------------------------------------------------------------------------------------|--------------------------------------------------------------------------------------|--------------|-----------------------------------|-------------------|
| NS28  | 1,3-dimethylthiourea                                                                     | 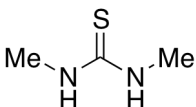    | S<br>N       | 173.2<br>NA                       | 2.056<br>NA       |
| NS29  | 1,1,3,3-tetramethylthiourea                                                              |     | S<br>N       | 181.9<br>NA                       | 2.059<br>NA       |
| NS30  | 1,3-diphenylthiourea                                                                     |     | S<br>N       | 180.2<br>NA                       | 2.058<br>NA       |
| S31   | triphenylphosphine sulfide                                                               |     | S            | 184.2                             | 2.075             |
| S32   | carbon disulfide                                                                         | S=C=S                                                                                | S            | 109.1                             | 2.052             |
| S33   | 1,2-dimethyldisulfane                                                                    | Me-S-S-Me                                                                            | S            | 150.1                             | 2.078             |
| S34   | 1,2-diphenyldiselane                                                                     | Ph-Se-Se-Ph                                                                          | Se           | 173.2                             | 2.222             |
| S35   | diphenylselane                                                                           | Ph-Se-Ph                                                                             | Se           | 173.1                             | 2.210             |
| NS36  | (Z)-N-(3,5-bis(trifluoromethyl)phenyl)-4-(dimethyliminio)pyridine-1(4H)-carbimidothioate |  | S<br>N1      | 189.3<br>172.5                    | 2.079<br>1.777    |

## OXYGEN BASED ACCEPTORS

| Label  | Name                          | Structure                                                                           | Binding Site   | Cl <sup>+</sup> affinity kcal/mol | X-Cl distance (Å)       |
|--------|-------------------------------|-------------------------------------------------------------------------------------|----------------|-----------------------------------|-------------------------|
| O1     | water                         | H <sub>2</sub> O                                                                    | O              | 81.0                              | 1.774                   |
| O2     | methanol                      | Me-OH                                                                               | O              | 98.3                              | 1.762                   |
| O3     | ethanol                       | Et-OH                                                                               | O              | 104.9                             | 1.757                   |
| O4     | propan-2-ol                   | <i>i</i> -Pr-OH                                                                     | O              | 110.5                             | 1.751                   |
| O5     | butan-1-ol                    | <i>n</i> -Bu-OH                                                                     | O              | 106.1                             | 1.753                   |
| O6     | 2-methylpropan-2-ol           | <i>t</i> -Bu-OH                                                                     | O              | 117.4                             | 1.731                   |
| O7     | cyclopropanol                 |    | O              | 104.9                             | 1.805                   |
| O8     | cyclobutanol                  |    | O              | 109.9                             | 1.766                   |
| O9     | cyclopentanol                 |    | O              | 113.5                             | 1.750                   |
| O10    | cyclohexanol                  |    | O              | 114.3                             | 1.747                   |
| AO11*  | prop-2-en-1-ol                |    | O<br>C3        | 109.8<br>147.4                    | 1.746<br>1.799          |
| AO12   | phenol                        |   | O<br>C2        | 106.3<br>152.3                    | 2.138<br>1.814          |
| AO13   | <i>p</i> -cresol              |  | O<br>C2        | 113.9<br>157.9                    | 2.205<br>1.806          |
| AO14   | 4-( <i>tert</i> -butyl)phenol |  | O<br>C2        | 116.5<br>159.1                    | 2.247<br>1.818          |
| AO15   | 4-methoxyphenol               |  | O1<br>C2<br>C3 | 124.8<br>156.0<br>158.4           | 2.326<br>1.807<br>1.877 |
| AO16   | 2,4,6-trimethylphenol         |  | O<br>C3        | 124.6<br>159.3                    | 2.321<br>1.816          |
| AO17** | 4-fluorophenol                |  | C1<br>C2<br>O  | 137.4<br>146.1<br>NA              | 1.886<br>1.821<br>NA    |
| AO18   | 4-chlorophenol                |  | O<br>C2        | 106.4<br>145.3                    | 2.211<br>1.816          |

\*Addition of Cl<sup>+</sup> to the olefin leads to the epoxide during geometry optimization. \*\*Attempts for the geometry optimization of the structure in which Cl<sup>+</sup> was attached to OH resulted in the migration of the halogen to C2.

| Label | Name                                                 | Structure                                                                            | Binding Site | Cl <sup>+</sup> affinity kcal/mol | X-Cl distance (Å) |
|-------|------------------------------------------------------|--------------------------------------------------------------------------------------|--------------|-----------------------------------|-------------------|
| AO19  | 4-bromophenol                                        | 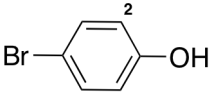    | O            | 107.2                             | 2.222             |
|       |                                                      |                                                                                      | C2           | 145.7                             | 1.816             |
| AO20  | 4-iodophenol                                         |     | C2           | 147.2                             | 1.816             |
|       |                                                      |                                                                                      | O            | 110.1                             | 2.240             |
| AO21  | hydroquinone                                         |     | O            | 120.5                             | 2.216             |
|       |                                                      |                                                                                      | C2           | 153.9                             | 1.807             |
| AO22  | resorcinol                                           |     | O            | 108.4                             | 2.178             |
|       |                                                      |                                                                                      | C2           | 162.4                             | 1.816             |
|       |                                                      |                                                                                      | C4           | 165.9                             | 1.816             |
| AO23* | pyrocatechol                                         |     | O            | NA                                | NA                |
|       |                                                      |                                                                                      | C3           | 152.9                             | 1.808             |
|       |                                                      |                                                                                      | C4           | 154.1                             | 1.823             |
| AO157 | 2-hydroxybenzaldehyde                                |    | O            | 125.3                             | 1.727             |
|       |                                                      |                                                                                      | C5           | 149.5                             | 1.822             |
| AO158 | 2-hydroxybenzoic acid                                |   | O            | 124.7                             | 1.731             |
|       |                                                      |                                                                                      | C5           | 153.7                             | 1.823             |
| NO24  | pyridin-4-ol                                         |   | O            | 90.3                              | 1.917             |
|       |                                                      |                                                                                      | N            | 161.7                             | 1.725             |
| O25   | phenylmethanol                                       | Ph-CH <sub>2</sub> -OH                                                               | O            | 118.4                             | 1.786             |
| OP16  | phosphinetriyltrimethanol                            |   | O            | 123.6                             | 1.757             |
|       |                                                      |                                                                                      | P            | 191.3                             | 2.017             |
| NO26  | 3-hydroxy-2-(4-methylphenylsulfonamido)butanoic acid |  | O1           | 137.0                             | 1.779             |
|       |                                                      |                                                                                      | N            | 138.5                             | 1.749             |
| NO27  | hydroxylamine                                        | H <sub>2</sub> N-OH                                                                  | O            | 95.0                              | 1.883             |
|       |                                                      |                                                                                      | N            | 131.2                             | 1.784             |

\*Attempts for the geometry optimization of the structure in which Cl<sup>+</sup> was attached to OH resulted in the migration of the halogen to C3.

| Label | Name                              | Structure | Binding Site | Cl <sup>+</sup> affinity kcal/mol | X-Cl distance (Å) |
|-------|-----------------------------------|-----------|--------------|-----------------------------------|-------------------|
| NO28  | 2-aminoethanol                    |           | O            | 148.2                             | 1.725             |
|       |                                   |           | N            | 153.5                             | 1.763             |
| NO55  | 2-(dimethylamino)ethanol          |           | O            | 158.0                             | 1.725             |
|       |                                   |           | N            | 161.8                             | 1.807             |
| O29   | ethane-1,2-diol                   |           | O            | 117.4                             | 1.745             |
| O30   | propane-1,3-diol                  |           | O            | 129.9                             | 1.743             |
| NO31  | <i>N</i> -methylhydroxylamine     |           | O            | 106.7                             | 2.006             |
|       |                                   |           | N            | 142.9                             | 1.798             |
| NO32  | <i>N,N</i> -dimethylhydroxylamine |           | N            | 150.5                             | 1.798             |
|       |                                   |           | O            | 117.4                             | 1.798             |
| AO141 | nitrobenzene                      |           | O            | 118.2                             | 1.709             |
|       |                                   |           | C3           | 121.8                             | 1.804             |
| O33   | methoxymethane                    |           | O            | 107.9                             | 1.760             |
| O34   | 2-isopropoxypropane               |           | O            | 123.8                             | 1.743             |
| AO153 | anisole                           |           | O            | 112.1                             | 2.026             |
|       |                                   |           | C1           | 155.6                             | 1.826             |
| O35   | oxydibenzene                      |           | O            | 115.0                             | 2.240             |
| O36   | (oxybis(methylene))dibenzene      |           | O            | 129.2                             | 1.762             |
| AO37  | ethoxyethene                      |           | O            | NA                                | NA                |
|       |                                   |           | C2           | 165.5                             | 1.808             |
| AO38  | <i>(E)</i> -1-ethoxyprop-1-ene    |           | O            | NA                                | NA                |
|       |                                   |           | C2           | 171.3                             | 1.835             |

| Label | Name                                                    | Structure                                                                           | Binding Site               | Cl <sup>+</sup> affinity kcal/mol | X-Cl distance (Å)                         |
|-------|---------------------------------------------------------|-------------------------------------------------------------------------------------|----------------------------|-----------------------------------|-------------------------------------------|
| AO39  | 2-ethoxyprop-1-ene                                      | 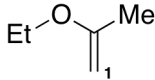   | O<br>C1                    | NA<br>176.9                       | NA<br>1.806                               |
| AO40  | (E)-methyl 3-methoxyacrylate                            |    | O<br>C2                    | NA<br>160.6                       | NA<br>1.787                               |
| AO41  | (ethynyloxy)ethyne                                      |    | C2<br>O                    | 144.2<br>NA                       | 1.715<br>NA                               |
| AO42  | methoxyethyne                                           |    | C2<br>O                    | 162.8<br>NA                       | 1.717<br>NA                               |
| AO43  | (ethoxyethynyl)trimethylsilane                          |    | C2<br>O                    | 175.9<br>NA                       | 1.732<br>NA                               |
| ANO44 | 4-methyl-3,4-dihydro-2H-1,4-oxazine                     |    | C5<br>N<br>O               | 196.1<br>NA<br>NA                 | 1.851<br>NA<br>NA                         |
| NO45  | morpholine                                              |   | O (eq)<br>N (ax)<br>N (eq) | 117.8<br>156.0<br>157.5           | 1.883<br>1.791<br>1.790                   |
| NO46  | 4-methylmorpholine                                      |  | O<br>N (ax)<br>N (eq)      | 118.5<br>159.7<br>158.5           | 1.804<br>1.804<br>1.811                   |
| OP17  | trimethyl phosphite                                     |  | O<br>P                     | 130.9<br>202.1                    | 1.740<br>2.006                            |
| OP18  | triethyl phosphite                                      |  | O<br>P                     | 135.7<br>209.1                    | 1.742<br>2.013                            |
| OP19  | triphenyl phosphite                                     |  | O<br>P                     | 128.1<br>198.4                    | 1.846<br>2.000                            |
| AOP25 | 4-chlorodinaphtho[2,1-d:1',2'-f][1,3,2]dioxaphosphepine |  | O<br>P<br>C1               | NA<br>181.0<br>152.0              | Cl transfer to C1<br>1.985, 1.84<br>1.886 |

| Label | Name                                                 | Structure | Binding Site      | Cl <sup>+</sup> affinity kcal/mol | X-Cl distance (Å) |
|-------|------------------------------------------------------|-----------|-------------------|-----------------------------------|-------------------|
| O47   | oxirane                                              |           | O                 | 104.4                             | 1.752             |
| O48   | <i>cis</i> -2,3-dimethyloxirane                      |           | O ( <i>syn</i> )  | 117.6                             | 1.738             |
|       |                                                      |           | O ( <i>anti</i> ) | 119.8                             | 1.746             |
| O49   | <i>trans</i> -2,3-dimethyloxirane                    |           | O                 | 118.6                             | 1.742             |
| O50   | <i>trans</i> -2,3-di- <i>tert</i> -butyloxirane      |           | O                 | 122.5                             | 1.742             |
| O51   | <i>trans</i> -2,3-diphenyloxirane                    |           | O                 | 141.4                             | 1.743             |
| O52   | <i>trans</i> -2,3-dibenzyloxirane                    |           | O                 | 124.5                             | 1.754             |
| OS5   | 2-mercapto-2-methyl propanoic acid                   |           | O1                | 119.4                             | 1.751             |
|       |                                                      |           | S                 | 142.9                             | 2.071             |
| NOS6  | 2-amino-3-mercapto propanoic acid                    |           | O1                | 107.5                             | 1.747             |
|       |                                                      |           | S                 | 175.6                             | 2.070             |
|       |                                                      |           | N                 | 139.7                             | 1.777             |
| OS23  | <i>S</i> - <i>tert</i> -butyl carbonochloridothioate |           | O                 | 105.9                             | 1.742             |
|       |                                                      |           | S                 | 136.6                             | 2.024             |
| OP24  | diphenyl(phenylsulfonyl)phosphine                    |           | O                 | 141.7                             | 1.739             |
|       |                                                      |           | P                 | 198.8                             | 2.030             |
| OS24  | (methylsulfinyl)cyclopentane                         |           | O                 | 144.6                             | 1.747             |
| OS25  | <i>S</i> -phenyl benzenesulfonylthioate              |           | O                 | 126.6                             | 1.744             |
|       |                                                      |           | S1                | 156.2                             | 2.058             |



## NIROGEN BASED ACCEPTORS

| Label | Name                             | Structure                                                                           | Binding Site | Cl <sup>+</sup> affinity kcal/mol | X-Cl distance (Å)       |
|-------|----------------------------------|-------------------------------------------------------------------------------------|--------------|-----------------------------------|-------------------------|
| N1    | ammonia                          | NH <sub>3</sub>                                                                     | N            | 132.5                             | 1.764                   |
| N2    | methanamine                      | Me-NH <sub>2</sub>                                                                  | N            | 146.7                             | 1.773                   |
| N3    | ethanamine                       | Et-NH <sub>2</sub>                                                                  | N            | 151.0                             | 1.772                   |
| N4    | propan-2-amine                   | <i>i</i> -Pr-NH <sub>2</sub>                                                        | N            | 154.3                             | 1.772                   |
| N5    | 2-methylpropan-2-amine           | <i>t</i> -Bu-NH <sub>2</sub>                                                        | N            | 156.9                             | 1.774                   |
| N6    | prop-2-yn-1-amine                | 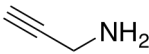   | N            | 146.1                             | 1.773                   |
| N7    | prop-2-en-1-amine                |    | N            | 152.8                             | 1.778                   |
| N8    | but-3-en-2-amine                 |    | N            | 153.4                             | 1.780                   |
| N9    | cyclohexanamine                  | Cy-NH <sub>2</sub>                                                                  | N (eq)       | 157.8                             | 1.777                   |
| N10   | aniline                          | Ph-NH <sub>2</sub>                                                                  | N            | 146.8                             | 1.865                   |
| N11   | phenylmethanamine                | Ph-CH <sub>2</sub> -NH <sub>2</sub>                                                 | N            | 157.8                             | 1.788                   |
| N12   | naphthalen-1-amine               |   | N            | 153.5                             | 2.072                   |
| N13   | naphthalen-2-amine               |  | N            | 152.2                             | 2.004                   |
| AN164 | 2-aminobenzoic acid              |  | N<br>C5      | 150.0<br>168.6                    | 1.810<br>1.827          |
| N14   | cyanamide                        | <sup>2</sup> NC- <sup>1</sup> NH <sub>2</sub>                                       | N1<br>N2     | 93.7<br>125.4                     | 1.858<br>1.637          |
| N15   | 2-aminoacetic acid               | HO <sub>2</sub> C-CH <sub>2</sub> -NH <sub>2</sub>                                  | N            | 146.7                             | 1.764                   |
| N16   | methyl 2-aminoacetate            | MeO <sub>2</sub> C-CH <sub>2</sub> -NH <sub>2</sub>                                 | N            | 146.0                             | 1.778                   |
| NOS6  | 2-amino-3-mercaptopropanoic acid |  | N<br>O1<br>S | 139.7<br>107.5<br>175.6           | 1.777<br>1.747<br>2.070 |
| NS26  | benzothioamide                   |  | N<br>S       | 129.3<br>175.8                    | 1.796<br>2.056          |
| NO27  | hydroxylamine                    | HO-NH <sub>2</sub>                                                                  | N<br>O       | 131.2<br>95.0                     | 1.784<br>1.883          |

| Label | Name                        | Structure                                                                           | Binding Site | Cl <sup>+</sup> affinity kcal/mol | X-Cl distance (Å) |
|-------|-----------------------------|-------------------------------------------------------------------------------------|--------------|-----------------------------------|-------------------|
| NO28  | 2-aminoethanol              | 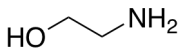   | N            | 153.5                             | 1.763             |
|       |                             |                                                                                     | O            | 148.2                             | 1.725             |
| N17   | hydrazine                   |    | N            | 147.7                             | 1.858             |
| N18   | ethane-1,2-diamine          |    | N            | 164.2                             | 1.758             |
| N19   | naphthalene-1,8-diamine     |    | N            | 168.4                             | 1.835             |
| N20   | guanidine                   |    | N            | 173.9                             | 1.709             |
| N21   | methanesulfonamide          |    | N            | 124.9                             | 1.747             |
| N22   | trifluoromethanesulfonamide |    | N            | 113.8                             | 1.744             |
| N23   | 4-methyl benzenesulfonamide |   | N            | 142.8                             | 1.744             |
| N24   | dimethylamine               |  | N            | 155.6                             | 1.786             |
| N25   | diethylamine                |  | N            | 161.7                             | 1.786             |
| N26   | diisopropylamine            |  | N            | 164.7                             | 1.793             |
| N27   | di-tert-butylamine          |  | N            | 164.7                             | 1.797             |
| N28   | bis(trimethylsilyl)amine    |  | N            | 162.6                             | 1.798             |
| N29   | diphenylamine               |  | N            | 151.3                             | 1.901             |
| N30   | dibenzylamine               |  | N            | 167.4                             | 1.785             |
| N31   | N-methylprop-2-en-1-amine   |  | N            | 153.7                             | 1.780             |
| NO31  | N-methylhydroxylamine       |  | N            | 142.9                             | 1.798             |
|       |                             |                                                                                     | O            | 106.7                             | 2.006             |

| Label | Name                                                                      | Structure | Binding Site | Cl <sup>+</sup> affinity kcal/mol | X-Cl distance (Å) |
|-------|---------------------------------------------------------------------------|-----------|--------------|-----------------------------------|-------------------|
| N32   | methylhydrazine                                                           |           | N1           | 159.0                             | 1.870             |
| N33   | <i>N</i> <sup>1</sup> -methylethane-1,2-diamine                           |           | N1           | 171.1                             | 1.781             |
| N34   | <i>N</i> <sup>1</sup> , <i>N</i> <sup>2</sup> -dimethylethane-1,2-diamine |           | N            | 170.9                             | 1.782             |
| N35   | 1,2-dimethylhydrazine                                                     |           | N            | 163.1                             | 1.939             |
| N36   | 1,2-diphenylhydrazine                                                     |           | N            | 161.7                             | 2.196             |
| AN162 | benzamide                                                                 |           | C3           | 137.2                             | 1.808             |
|       |                                                                           |           | N            | 133.0                             | 1.763             |
| NS26  | benzothioamide                                                            |           | S            | 175.8                             | 2.056             |
|       |                                                                           |           | N            | 129.3                             | 1.796             |
| NS27  | thiourea                                                                  |           | S            | 169.6                             | 2.045             |
|       |                                                                           |           | N            | NA                                | NA                |
| NS28  | 1,3-dimethylthiourea                                                      |           | N            | NA                                | NA                |
|       |                                                                           |           | S            | 173.2                             | 2.056             |
| NS29  | 1,1,3,3-tetramethylthiourea                                               |           | S            | 181.9                             | 2.059             |
|       |                                                                           |           | N            | NA                                | NA                |
| NS30  | 1,3-diphenylthiourea                                                      |           | S            | 180.2                             | 2.058             |
|       |                                                                           |           | N            | NA                                | NA                |
| N37   | aziridine                                                                 |           | N            | 150.5                             | 1.740             |
| N38   | azetidine                                                                 |           | N            | 161.8                             | 1.761             |
| N39   | pyrrolidine                                                               |           | N            | 162.3                             | 1.770             |
| N40   | piperidine                                                                |           | N (ax)       | 162.7                             | 1.789             |
|       |                                                                           |           | N (eq)       | 164.3                             | 1.785             |
| NO45  | morpholine                                                                |           | N (ax)       | 156.0                             | 1.791             |
|       |                                                                           |           | N (eq)       | 157.5                             | 1.790             |
|       |                                                                           |           | O (eq)       | 117.8                             | 1.883             |

| Label | Name                                                 | Structure                                                                            | Binding Site | Cl <sup>+</sup> affinity kcal/mol | X-Cl distance (Å) |
|-------|------------------------------------------------------|--------------------------------------------------------------------------------------|--------------|-----------------------------------|-------------------|
| N41   | <i>cis</i> -2,6-dimethylpiperidine                   | 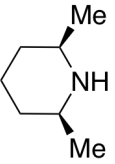    | N (ax)       | 165.5                             | 1.789             |
|       |                                                      |                                                                                      | N (eq)       | 166.2                             | 1.794             |
| N42   | <i>trans</i> -2,6-dimethylpiperidine                 |     | N (ax)       | 167.5                             | 1.791             |
|       |                                                      |                                                                                      | N (eq)       | 167.5                             | 1.791             |
| N43   | 2,2,6,6-tetramethylpiperidine                        |     | N (ax)       | 163.5                             | 1.797             |
|       |                                                      |                                                                                      | N (eq)       | 168.9                             | 1.798             |
| N44   | 7-azabicyclo[2.2.1]heptane                           |     | N            | 166.9                             | 1.766             |
| N45   | indoline                                             |    | N            | 158.8                             | 1.869             |
| N46   | 1,2,3,4-tetrahydroquinoline                          |   | N            | 155.4                             | 1.832             |
| N47   | 1,2,3,4-tetrahydroisoquinoline                       |   | N (ax)       | 162.1                             | 1.788             |
|       |                                                      |                                                                                      | N (eq)       | 163.9                             | 1.786             |
| NO26  | 3-hydroxy-2-(4-methylphenylsulfonamido)butanoic acid |  | N            | 138.5                             | 1.749             |
|       |                                                      |                                                                                      | O1           | 137.0                             | 1.779             |
| N48   | trimethylamine                                       |   | N            | 160.1                             | 1.799             |
| N49   | triethylamine                                        |   | N            | 167.7                             | 1.805             |

| Label | Name                                                                                                                         | Structure                                                                           | Binding Site     | Cl <sup>+</sup> affinity kcal/mol | X-Cl distance (Å) |
|-------|------------------------------------------------------------------------------------------------------------------------------|-------------------------------------------------------------------------------------|------------------|-----------------------------------|-------------------|
| N50   | triisopropylamine                                                                                                            | 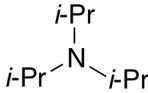   | N                | 160.4                             | 1.834             |
| N51   | <i>N</i> -ethyl- <i>N</i> -isopropylpropan-2-amine                                                                           |    | N                | 166.3                             | 1.820             |
| N52   | tri- <i>tert</i> -butylamine                                                                                                 |    | N                | 169.2                             | 1.800             |
| N53   | triphenylamine                                                                                                               |    | N                | 202.9                             | 2.409             |
| N54   | tribenzylamine                                                                                                               |    | N                | 170.1                             | 1.794             |
| NO32  | <i>N,N</i> -dimethylhydroxylamine                                                                                            |    | N<br>O           | 150.5<br>117.4                    | 1.798<br>1.798    |
| NO55  | 2-(dimethylamino)ethanol                                                                                                     |   | N<br>O           | 161.8<br>158.0                    | 1.807<br>1.725    |
| N56   | <i>N</i> <sup>1</sup> , <i>N</i> <sup>1</sup> , <i>N</i> <sup>2</sup> , <i>N</i> <sup>2</sup> -tetramethylethane-1,2-diamine |  | N                | 164.4                             | 1.802             |
| N57   | 1,1,2,2-tetramethylhydrazine                                                                                                 |  | N                | 168.9                             | 2.068             |
| NP20  | <i>N,N,N',N',1</i> -pentamethylphosphinediamine                                                                              |  | N<br>P           | 177.8<br>219.9                    | 1.792<br>2.045    |
| N58   | 1-methylaziridine                                                                                                            |  | N                | 157.4                             | 1.758             |
| N59   | 1-methylazetidine                                                                                                            |  | N                | 164.3                             | 1.785             |
| N60   | 1-methylpyrrolidine                                                                                                          |  | N                | 165.4                             | 1.799             |
| N61   | 1-methylpiperidine                                                                                                           |  | N (ax)<br>N (eq) | 165.9<br>165.1                    | 1.803<br>1.804    |

| Label | Name                                                           | Structure | Binding Site            | Cl <sup>+</sup> affinity kcal/mol | X-Cl distance (Å) |
|-------|----------------------------------------------------------------|-----------|-------------------------|-----------------------------------|-------------------|
| N62   | 1-phenylpiperidine                                             |           | N                       | 161.8                             | 1.838             |
| NO46  | 4-methylmorpholine                                             |           | N (ax)                  | 159.7                             | 1.804             |
|       |                                                                |           | N (eq)                  | 158.5                             | 1.811             |
|       |                                                                |           | O (eq)                  | 118.5                             | 1.804             |
| ANO44 | 4-methyl-3,4-dihydro-2H-1,4-oxazine                            |           | N                       | NA                                | NA                |
|       |                                                                |           | O                       | NA                                | NA                |
|       |                                                                |           | C5                      | 196.1                             | 1.851             |
| N63   | 7-methyl-7-azabicyclo[2.2.1]heptane                            |           | N                       | 169.0                             | 1.793             |
| AN64  | 7-methyl-7-azabicyclo[2.2.1]hept-2-ene                         |           | N (Cl syn to C=C)       | 169.0                             | 1.796             |
|       |                                                                |           | N (Cl anti to C=C)      | 170.8                             | 1.794             |
|       |                                                                |           | C2                      | 188.4                             | 1.781             |
| N65   | quinuclidine                                                   |           | N                       | 171.3                             | 1.791             |
| AN66  | 1-azabicyclo[2.2.2]oct-2-ene                                   |           | C2-C3                   | 152.6                             | 1.924             |
|       |                                                                |           | N                       | 168.2                             | 1.780             |
| N67   | 1,4-diazabicyclo[2.2.2]octane                                  |           | N (1 <sup>st</sup> -Cl) | 167.5                             | 1.796             |
|       |                                                                |           | N (2 <sup>nd</sup> -Cl) | 55.3                              | 1.783             |
| N68   | 1,3,5,7-Tetraazatricyclo[3.3.1.1 <sup>3,7</sup> ]decane (HMTA) |           | N                       | 169.6                             | 1.773             |
| NP22  | 1,3,5-triaza-7-phosphaadamantane                               |           | N                       | 170.0                             | 1.800             |
|       |                                                                |           | P                       | 200.5                             | 2.021             |
| N69   | 1,5-diazabicyclo [4.3.0] non-5-ene (DBN)                       |           | N1                      | 148.6                             | 1.806             |
|       |                                                                |           | N2                      | 184.9                             | 1.723             |
| N70   | 1,8-diazabicyclo [5.4.0] undec-7-ene (DBU)                     |           | N1                      | 148.9                             | 1.816             |
|       |                                                                |           | N2                      | 184.2                             | 1.730             |
| NS8   | 2-(1,4,5,6-tetrahydropyrimidin-2-yl)benzenethiol               |           | S                       | 180.5                             | 2.103             |
|       |                                                                |           | N1                      | 156.4                             | 1.793             |
|       |                                                                |           | N3                      | 181.4                             | 1.725             |

| Label | Name                                                                                                                              | Structure                                                                           | Binding Site    | Cl <sup>+</sup> affinity kcal/mol | X-Cl distance (Å) |
|-------|-----------------------------------------------------------------------------------------------------------------------------------|-------------------------------------------------------------------------------------|-----------------|-----------------------------------|-------------------|
| NP23  | <i>N</i> -(triphenyl phosphoranylidene)aniline                                                                                    | 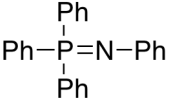   | N               | 189.3                             | 1.773             |
| N71   | Sparteine                                                                                                                         |    | N               | 171.8                             | 1.817             |
| N72   | 1-methylindoline                                                                                                                  |    | N               | 162.1                             | 1.876             |
| N73   | 1-methyl-1,2,3,4-tetrahydroquinoline                                                                                              |    | N (pseudo-ax)   | 161.0                             | 1.866             |
|       |                                                                                                                                   |                                                                                     | N (pseudo-eq)   | 159.7                             | 1.837             |
| N74   | 2-methyl-1,2,3,4-tetrahydroisoquinoline                                                                                           |    | N               | 165.5                             | 1.803             |
| N75   | <i>N</i> <sup>1</sup> , <i>N</i> <sup>1</sup> , <i>N</i> <sup>8</sup> , <i>N</i> <sup>8</sup> -tetramethylnaphthalene-1,8-diamine |   | N               | 154.4                             | 1.844             |
| N76   | <i>N,N</i> -dimethylaniline                                                                                                       |  | N               | 156.8                             | 1.843             |
| NS7   | 4-(dimethylamino)benzenethiol                                                                                                     |  | N               | 157.3                             | 1.976             |
|       |                                                                                                                                   |                                                                                     | S               | 167.6                             | 2.213             |
| N77   | pyridine                                                                                                                          |  | N               | 157.3                             | 1.728             |
| N78   | 2-methylpyridine                                                                                                                  |  | N               | 161.3                             | 1.732             |
| N79   | 3-methylpyridine                                                                                                                  |  | N               | 160.8                             | 1.730             |
| N80   | 4-methylpyridine                                                                                                                  |  | N               | 161.8                             | 1.727             |
| N81   | 2,6-dimethylpyridine                                                                                                              |  | N               | 164.4                             | 1.736             |
| N82   | 2,6-di- <i>tert</i> -butylpyridine                                                                                                |  | N               | 150.5                             | 1.743             |
|       |                                                                                                                                   |                                                                                     | N (SM8-acetone) | 126.1                             | 1.749             |

| Label | Name                                        | Structure                                                                           | Binding Site     | Cl <sup>+</sup> affinity kcal/mol | X-Cl distance (Å) |
|-------|---------------------------------------------|-------------------------------------------------------------------------------------|------------------|-----------------------------------|-------------------|
| N83   | 2,4,6-trimethylpyridine                     | 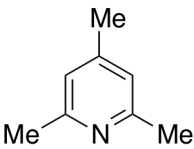   | N                | 168.2                             | 1.735             |
|       |                                             |                                                                                     | N (SM8-acetone)  | 148.2                             | 1.743             |
| N84   | 2,6-di- <i>tert</i> -butyl-4-methylpyridine |    | N                | 153.1                             | 1.742             |
|       |                                             |                                                                                     | N (SM8-acetone)  | 127.2                             | 1.742             |
| N85   | 2-methoxypyridine                           |    | N                | 161.9                             | 1.725             |
| N86   | 3-methoxypyridine                           |    | N                | 160.9                             | 1.731             |
| N87   | 4-methoxypyridine                           |    | N                | 165.2                             | 1.725             |
| N88   | <i>N,N</i> -dimethylpyridin-4-amine         |   | N1               | 176.0                             | 1.724             |
|       |                                             |                                                                                     | N1 (SM8-acetone) | 154.3                             | 1.732             |
|       |                                             |                                                                                     | N2               | 145.7                             | 1.823             |
| NO24  | 4-hydroxypyridine                           |  | N                | 161.7                             | 1.725             |
|       |                                             |                                                                                     | O                | 90.3                              | 1.917             |
| N89   | 4-( <i>tert</i> -butyl)pyridine             |  | N                | 164.6                             | 1.727             |
|       |                                             |                                                                                     | N (SM8-acetone)  | 146.3                             | 1.737             |
| N90   | 4-phenylpyridine                            |  | N                | 165.7                             | 1.725             |
|       |                                             |                                                                                     | N (SM8-acetone)  | 145.7                             | 1.735             |
| N91   | 4-benzylpyridine                            |  | N                | 164.7                             | 1.728             |
| N92   | 4-bromopyridine                             |  | N                | 153.4                             | 1.726             |
|       |                                             |                                                                                     | N (SM8-acetone)  | 138.8                             | 1.735             |
| N93   | 4-chloropyridine                            |  | N                | 152.9                             | 1.726             |
| N94   | 4-cyanopyridine                             |  | N1               | 145.2                             | 1.725             |
|       |                                             |                                                                                     | N1 (SM8-acetone) | 138.0                             | 1.737             |
|       |                                             |                                                                                     | N2               | 120.5                             | 1.614             |
| N95   | 4-(trifluoromethyl)pyridine                 |  | N                | 149.3                             | 1.726             |
|       |                                             |                                                                                     | N (SM8-acetone)  | 137.2                             | 1.736             |



| Label | Name                                                             | Structure | Binding Site    | Cl <sup>+</sup> affinity kcal/mol | X-Cl distance (Å)  |
|-------|------------------------------------------------------------------|-----------|-----------------|-----------------------------------|--------------------|
| N96   | pyridine-4-carbaldehyde                                          |           | N               | 150.8                             | 1.726              |
|       |                                                                  |           | N (SM8-acetone) | 140.8                             | 1.737              |
| N97   | 4-pyridyl methyl ketone                                          |           | N               | 154.6                             | 1.726              |
| N98   | quinoline                                                        |           | N               | 163.3                             | 1.733              |
| N99   | isoquinoline                                                     |           | N               | 164.7                             | 1.728              |
| N100  | pyridazine                                                       |           | N               | 154.4                             | 1.728              |
| N101  | pyrimidine                                                       |           | N               | 146.7                             | 1.729              |
| N102  | pyrazine                                                         |           | N               | 144.2                             | 1.727              |
| N103  | 1,3,5-triazine                                                   |           | N               | 135.0                             | 1.725              |
| AN104 | 1 <i>H</i> -imidazole                                            |           | N1              | 107.7                             | 1.791              |
|       |                                                                  |           | N3              | 159.5                             | 1.704              |
|       |                                                                  |           | C2              | 151.8                             | 1.770              |
|       |                                                                  |           | C4              | 149.9                             | 1.792              |
| ANP27 | 5-(dimethylphosphino)-1-phenyl-1 <i>H</i> -pyrazole              |           | P               | 205.9                             | 2.036              |
|       |                                                                  |           | N2              | 160.4                             | 1.696              |
|       |                                                                  |           | N1              | NA                                | Cl transfers to C3 |
|       |                                                                  |           | C5              | 160.1                             | 1.780              |
|       |                                                                  |           | C4              | 171.2                             | 1.805              |
|       |                                                                  |           | C3              | 159.3                             | 1.798              |
| ANP28 | 2-(di- <i>tert</i> -butylphosphino)-1-phenyl-1 <i>H</i> -pyrrole |           | P               | 217.9                             | 2.038              |
|       |                                                                  |           | N               | 131.8                             | 1.830              |
|       |                                                                  |           | C2              | 173.8                             | 1.798              |
|       |                                                                  |           | C3              | 177.6                             | 1.817              |
|       |                                                                  |           | C4              | 177.3                             | 1.811              |
| AN105 | 1 <i>H</i> -pyrrole                                              |           | N1              | 122.2                             | 1.796              |
|       |                                                                  |           | C2              | 169.8                             | 1.785              |
|       |                                                                  |           | C3              | 162.0                             | 1.801              |

| Label | Name                                                                                                             | Structure | Binding Site | Cl <sup>+</sup> affinity kcal/mol | X-Cl distance (Å) |
|-------|------------------------------------------------------------------------------------------------------------------|-----------|--------------|-----------------------------------|-------------------|
| AN106 | 1 <i>H</i> -indole                                                                                               |           | N1           | 135.1                             | 1.829             |
|       |                                                                                                                  |           | C2           | 170.1                             | 1.801             |
|       |                                                                                                                  |           | C3           | 173.8                             | 1.812             |
| AN107 | 6-methoxyquinoline                                                                                               |           | N            | 167.0                             | 1.734             |
|       |                                                                                                                  |           | C5           | 165.9                             | 1.838             |
|       |                                                                                                                  |           | C7           | 153.2                             | 1.829             |
| AN108 | 7 <i>H</i> -purine                                                                                               |           | C9           | 142.1                             | 1.892             |
|       |                                                                                                                  |           | N1           | 154.2                             | 1.728             |
|       |                                                                                                                  |           | N2           | 156.6                             | 1.723             |
| AN108 | 7 <i>H</i> -purine                                                                                               |           | N3           | 151.7                             | 1.702             |
|       |                                                                                                                  |           | N5           | 106.2                             | 1.803             |
|       |                                                                                                                  |           | C4           | 128.2                             | 1.775             |
| ANS10 | 1 <i>H</i> -pyrazolo[3,4- <i>d</i> ]pyrimidine-4-thiol                                                           |           | S            | 132.3                             | 2.059             |
|       |                                                                                                                  |           | N5           | 147.8                             | 1.730             |
|       |                                                                                                                  |           | N7           | 148.2                             | 1.723             |
|       |                                                                                                                  |           | N1           | 115.5                             | 1.772             |
| ANS9  | 4 <i>H</i> -1,2,4-triazole-3-thiol                                                                               |           | N2           | 140.3                             | 1.694             |
|       |                                                                                                                  |           | S            | 128.7                             | 2.086             |
|       |                                                                                                                  |           | N4           | 96.5                              | 1.782             |
| ANS9  | 4 <i>H</i> -1,2,4-triazole-3-thiol                                                                               |           | C5           | 145.3                             | 1.769             |
|       |                                                                                                                  |           | N2           | 153.0                             | 1.695             |
|       |                                                                                                                  |           | N1           | 122.4                             | 1.811             |
| AN109 | 1 <i>H</i> -benzimidazole                                                                                        |           | C2           | 153.7                             | 1.782             |
|       |                                                                                                                  |           | N3           | 163.0                             | 1.703             |
|       |                                                                                                                  |           | N            | 164.9                             | 1.726             |
| N110  | phthalazine                                                                                                      |           | N            | 164.9                             | 1.726             |
| N111  | 1,4-dimethoxyphthalazine                                                                                         |           | N            | 162.7                             | 1.731             |
|       |                                                                                                                  |           | N            | 162.7                             | 1.731             |
| NS36  | <i>Z</i> - <i>N</i> -(3,5-bis(trifluoromethyl)phenyl)-4-(dimethyliminio)pyridine-1(4 <i>H</i> )-carbimidothioate |           | S            | 189.3                             | 2.079             |
|       |                                                                                                                  |           | N1           | 172.5                             | 1.777             |

| Label | Name                                              | Structure | Binding Site         | Cl <sup>+</sup> affinity kcal/mol | X-Cl distance (Å) |
|-------|---------------------------------------------------|-----------|----------------------|-----------------------------------|-------------------|
| N112  | 3,5-dichloro-2,4,6-trioxo-1,3,5-triazinan-1-ide   |           | N<br>N (SM8-acetone) | 252.1<br>148.1                    | 1.715<br>1.715    |
| N113  | 3-chloro-2,5-dioxoimidazolidin-1-ide              |           | N                    | 273.6                             | 1.703             |
| N114  | 3-chloro-4,4-dimethyl-2,5-dioxoimidazolidin-1-ide |           | N<br>N (SM8-acetone) | 275.7<br>168.3                    | 1.705<br>1.708    |
| N115  | 2,5-dioxopyrrolidin-1-ide                         |           | N<br>N (SM8-acetone) | 290.1<br>181.1                    | 1.707<br>1.716    |
| N116  | 3-oxo-3H-benzo[d]isothiazol-2-ide 1,1-dioxide     |           | N                    | 265.0                             | 1.712             |
| N117  | 1,3-dioxoisindolin-2-ide                          |           | N<br>N (SM8-acetone) | 286.7<br>177.7                    | 1.702<br>1.705    |
| N118  | chloro(tosyl)amide                                |           | N                    | 273.3                             | 1.778             |
| N119  | (1-carboxy-2-hydroxypropyl)(tosyl)amide           |           | N                    | 268.2                             | 1.768             |

## PHOSPHORUS BASED ACCEPTORS

| Label | Name                                    | Structure                                                                           | Binding Site | Cl <sup>+</sup> affinity kcal/mol | X-Cl distance (Å) |
|-------|-----------------------------------------|-------------------------------------------------------------------------------------|--------------|-----------------------------------|-------------------|
| P1    | phosphine                               |    | P            | 156.0                             | 1.978             |
| P2    | phenylphosphine                         |    | P            | 184.6                             | 2.012             |
| P3    | trichlorophosphine                      |    | P            | 142.6                             | 1.980             |
| P4    | trimethylphosphine                      |    | P            | 205.9                             | 2.015             |
| P5    | <i>tert</i> -butyl diisopropylphosphine |    | P            | 220.5                             | 2.039             |
| P6    | triphenylphosphine                      |   | P            | 215.0                             | 2.049             |
| P7    | tribenzylphosphine                      |  | P            | 215.0                             | 2.022             |
| P8    | tri(naphthalen-1-yl)phosphine           |  | P            | 221.3                             | 2.057             |
| P9    | tri- <i>o</i> -tolylphosphine           |  | P            | 214.5                             | 2.055             |

| Label | Name                                                     | Structure                                                                           | Binding Site | Cl <sup>+</sup> affinity kcal/mol | X-Cl distance (Å) |
|-------|----------------------------------------------------------|-------------------------------------------------------------------------------------|--------------|-----------------------------------|-------------------|
| P10   | tris(4-methoxyphenyl)phosphine                           | 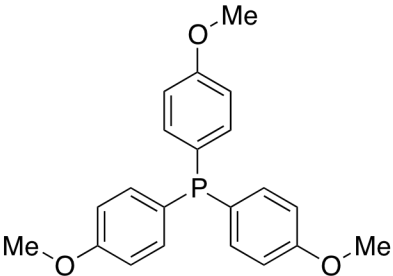  | P            | 227.8                             | 2.066             |
| P11   | tris(4-chlorophenyl)phosphine                            |   | P            | 207.7                             | 2.049             |
| P12   | tris(4-fluorophenyl)phosphine                            |   | P            | 211.3                             | 2.051             |
| P13   | tricyclopentylphosphine                                  |  | P            | 222.2                             | 2.037             |
| P14   | tricyclohexylphosphine                                   |  | P            | 223.5                             | 2.046             |
| P15   | 1,1,1,3,3,3-hexamethyl-2-(trimethylsilyl)disilaphosphane |  | P            | 216.7                             | 2.091             |
| OP16  | phosphinetriyltrimethanol                                |  | O            | 123.6                             | 1.757             |
| OP17  | trimethyl phosphite                                      |  | O            | 130.9                             | 1.740             |

| Label | Name                                                                      | Structure | Binding Site | Cl <sup>+</sup> affinity kcal/mol | X-Cl distance (Å)  |
|-------|---------------------------------------------------------------------------|-----------|--------------|-----------------------------------|--------------------|
| OP18  | triethyl phosphite                                                        |           | P            | 209.1                             | 2.013              |
|       |                                                                           |           | O            | 135.7                             | 1.742              |
| OP19  | triphenyl phosphite                                                       |           | P            | 198.4                             | 2.000              |
|       |                                                                           |           | O            | 128.1                             | 1.846              |
| NP20  | <i>N,N,N',N',1</i> -pentamethylphosphinediamine                           |           | P            | 219.9                             | 2.045              |
|       |                                                                           |           | N            | 177.8                             | 1.792              |
| NP21  | <i>N,N,N',N',N'',N''</i> -hexamethylphosphinetriamine                     |           | P            | 221.4                             | 2.075              |
|       |                                                                           |           | N            | 180.2                             | 1.792              |
| NP22  | 1,3,5-triaza-7-phosphaadamantane                                          |           | P            | 200.5                             | 2.021              |
|       |                                                                           |           | N            | 170.0                             | 1.800              |
| NP23  | <i>N</i> -(triphenyl phosphoranylidene)aniline                            |           | N            | 189.3                             | 1.773              |
| OP24  | diphenyl(phenylsulfonyl)phosphine                                         |           | P            | 198.7                             | 2.030              |
|       |                                                                           |           | O            | 141.7                             | 1.739              |
| AOP25 | 4-chlorodinaphtho[2,1- <i>d</i> :1',2'- <i>f</i> ][1,3,2]dioxaphosphepine |           | P            | 181.0                             | 1.984              |
|       |                                                                           |           | O            | NA                                | Cl transfers to C1 |
|       |                                                                           |           | C1           | 152.0                             | 1.886              |
| NP26  | 5-(dichlorophosphino)-5 <i>H</i> -dibenzo[ <i>b,f</i> ]azepine            |           | P            | 175.3                             | 2.001              |
|       |                                                                           |           | N            | NA                                | Cl transfers to P  |

| Label | Name                                                             | Structure                                                                           | Binding Site | Cl <sup>+</sup> affinity kcal/mol | X-Cl distance (Å)         |
|-------|------------------------------------------------------------------|-------------------------------------------------------------------------------------|--------------|-----------------------------------|---------------------------|
| ANP27 | 5-(dimethylphosphino)-1-phenyl-1 <i>H</i> -pyrazole              | 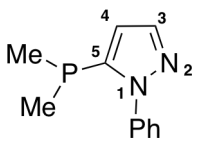   | P            | 205.9                             | 2.036                     |
|       |                                                                  |                                                                                     | N2           | 160.4                             | 1.696                     |
|       |                                                                  |                                                                                     | N1           | NA                                | <i>Cl transfers to C3</i> |
|       |                                                                  |                                                                                     | C5           | 160.1                             | 1.780                     |
|       |                                                                  |                                                                                     | C4           | 171.2                             | 1.805                     |
|       |                                                                  |                                                                                     | C3           | 159.3                             | 1.798                     |
| ANP28 | 2-(di- <i>tert</i> -butylphosphino)-1-phenyl-1 <i>H</i> -pyrrole |    | P            | 217.9                             | 2.038                     |
|       |                                                                  |                                                                                     | N            | 131.8                             | 1.830                     |
|       |                                                                  |                                                                                     | C2           | 173.8                             | 1.798                     |
|       |                                                                  |                                                                                     | C3           | 177.6                             | 1.817                     |
|       |                                                                  |                                                                                     | C4           | 177.3                             | 1.811                     |
|       |                                                                  |                                                                                     | C5           | 185.6                             | 1.793                     |
| AP29  | tri(furan-2-yl)phosphine                                         |   | P            | 205.5                             | 2.046                     |
|       |                                                                  |                                                                                     | C3           | 165.2                             | 1.807                     |
|       |                                                                  |                                                                                     | C4           | 154.6                             | 1.827                     |
|       |                                                                  |                                                                                     | C5           | 178.2                             | 1.778                     |
| P30   | 1,2-bis(diphenylphosphino)ethane                                 |  | P            | 217.6                             | 2.041                     |
| P31   | 1,2-bis(dichlorophosphino)benzene                                |  | P            | 162.2                             | 1.988                     |
